# Supplementary material
Source: MDPI journal article supplement (https://www.mdpi.com/2073-4395/11/2/227)
Supplement: s1 [file s1]

Archive with 2 entries (2 files):
- agronomy-1060504 supplementary/agronomy-1060504-supplementary 20210121.pdf
- agronomy-1060504 supplementary/agronomy-1060504-Table S1_20210118.xlsx
