# Supplementary material
Source: MDPI journal article supplement (https://www.mdpi.com/2073-4395/11/2/227)
Supplement: s1 [file s1 › agronomy-1060504 supplementary/agronomy-1060504-Table S1_20210118.xlsx]

## Sheet: Sheet1
Table S1. The details of the markers, the linkage maps of individual maps for Sp7A and G7A populations and the consensus map.
Index on iSelect 90K SNP bead chip	chr	Marker ID	physic map	Sp7A (cM)	Con_map_Wang2014 (cM)		Index on iSelect 90K SNP bead chip	chr	Marker ID	physic map	G7A (cM)	Con_map_Wang2014 (cM)		Index on iSelect 90K SNP bead chip	chr	Marker ID	physic map	Sp7A_G7A (cM)	Con_map_Wang2014 (cM)
72725	1A	1A_IWB72725	1232815	0			30645	1A	1A_IWB30645	4525448	0			30645	1A	1A_IWB30645	4525448	0
42055	1A	1A_IWB42055	1235280	0	13.7315		34707	1A	1A_IWB34707	3563047	2.22	16.7304		72725	1A	1A_IWB72725	1232815	0.65
29495	1A	1A_IWB29495	1336994	0	13.7315		42635	1A	1A_IWB42635	6899863	4.14	25.3385		42055	1A	1A_IWB42055	1235280	0.65	13.7315
8776	1A	1A_IWB8776	3760728	8.53	19.7325		8696	1A	1A_IWB8696	7294614	6.53	24.0625		29495	1A	1A_IWB29495	1336994	0.65	13.7315
11098	1A	1A_IWB11098	7658612	12.34	24.409		3088	1A	1A_IWB3088	9156654	13.24	27.3464		34707	1A	1A_IWB34707	3563047	2.22	16.7304
17894	1A	1A_IWB17894	7661858	12.34	25.2607		33789	1A	1A_IWB33789	9715311	13.24	27.3464		42635	1A	1A_IWB42635	6899863	4.14	25.3385
12206	1A	1A_IWB12206	12369432	22.54	35.6533		60396	1A	1A_IWB60396	10055484	18.33			8696	1A	1A_IWB8696	7294614	6.53	24.0625
2105	1A	1A_IWB2105	12916455	22.54	36.1552		11402	1A	1A_IWB11402	11182277	18.33	30.9865		8776	1A	1A_IWB8776	3760728	9.18	19.7325
21945	1A	1A_IWB21945	13671747	23.66	43.8584		78419	1A	1A_IWA4241	13178622	19.31	29.6781		11098	1A	1A_IWB11098	7658612	12.99	24.409
28635	1A	1A_IWB28635	13673697	23.66	41.2129		15678	1A	1A_IWB15678	11584302	19.86			17894	1A	1A_IWB17894	7661858	12.99	25.2607
12040	1A	1A_IWB12040	14046420	23.66	60.6243		12612	1A	1A_IWB12612	11633947	19.86	35.2323		3088	1A	1A_IWB3088	9156654	13.24	27.3464
71359	1A	1A_IWB71359_1	20518950	30.45	71.6619		48292	1A	1A_IWB48292	13201258	19.86			33789	1A	1A_IWB33789	9715311	13.24	27.3464
71359	1A	1A_IWB71359_2	20518950	30.45	71.6619		23623	1A	1A_IWB23623	35992403	20.36	29.1114		60396	1A	1A_IWB60396	10055484	18.33
41059	1A	1A_IWB41059	27392674	42.48	53.7179		59322	1A	1A_IWB59322	11571978	20.82	30.9865		11402	1A	1A_IWB11402	11182277	18.33	30.9865
1739	1A	1A_IWB1739	28361226	42.48			1201	1A	1A_IWB1201	12098032	22.23	35.2323		78419	1A	1A_IWA4241	13178622	19.31	29.6781
40979	1A	1A_IWB40979	28614097	42.48	52.5488		45546	1A	1A_IWB45546	12099004	22.23	35.2323		15678	1A	1A_IWB15678	11584302	19.86
3294	1A	1A_IWB3294	28626883	42.48	52.5488		56841	1A	1A_IWB56841	12099910	22.23	35.2323		12612	1A	1A_IWB12612	11633947	19.86	35.2323
12251	1A	1A_IWB12251	24321355	43.07	51.5092		7203	1A	1A_IWB7203	12157317	22.71	35.0638		48292	1A	1A_IWB48292	13201258	19.86
80744	1A	1A_IWA7377	24944403	43.75	51.9432		63712	1A	1A_IWB63712	12182178	22.71	38.1113		23623	1A	1A_IWB23623	35992403	20.36	29.1114
54638	1A	1A_IWB54638	25541241	43.75	51.9432		71175	1A	1A_IWB71175	12207676	22.71	38.1113		59322	1A	1A_IWB59322	11571978	20.82	30.9865
80500	1A	1A_IWA7050	25708710	43.75	51.9432		45122	1A	1A_IWB45122	12303775	22.71	35.2323		1201	1A	1A_IWB1201	12098032	22.23	35.2323
47586	1A	1A_IWB47586	26958877	43.75	51.0947		35649	1A	1A_IWB35649	12303846	22.71	38.1113		45546	1A	1A_IWB45546	12099004	22.23	35.2323
60691	1A	1A_IWB60691	26961620	43.75	51.9432		42452	1A	1A_IWB42452	12304195	22.71	38.1113		56841	1A	1A_IWB56841	12099910	22.23	35.2323
3419	1A	1A_IWB3419	31779240	45.88	55.1785		79872	1A	1A_IWA6172	12305206	23.19	38.1113		7203	1A	1A_IWB7203	12157317	22.71	35.0638
31602	1A	1A_IWB31602	32087536	45.88	55.1785		12206	1A	1A_IWB12206	12369432	23.19	35.6533		63712	1A	1A_IWB63712	12182178	22.71	38.1113
74868	1A	1A_IWB74868	458397080	62.3	74.7297		21572	1A	1A_IWB21572	13008267	23.19	31.9824		71175	1A	1A_IWB71175	12207676	22.71	38.1113
7022	1A	1A_IWB7022	465131790	62.3			43005	1A	1A_IWB43005	13663567	23.19	32.9838		45122	1A	1A_IWB45122	12303775	22.71	35.2323
36584	1A	1A_IWB36584	474642165	62.97	124.808		46667	1A	1A_IWB46667	13670677	23.19			35649	1A	1A_IWB35649	12303846	22.71	38.1113
78371	1A	1A_IWA4179	480831300	62.97	77.7836		36835	1A	1A_IWB36835	12585383	25.29	36.1552		42452	1A	1A_IWB42452	12304195	22.71	38.1113
78330	1A	1A_IWA4126	481692078	62.97	77.7836		63553	1A	1A_IWB63553	15345434	27.6			79872	1A	1A_IWA6172	12305206	23.19	38.1113
34496	1A	1A_IWB34496	482278982	62.97	74.7847		9029	1A	1A_IWB9029	22330782	35.28	47.04		12206	1A	1A_IWB12206	12369432	23.19	35.6533
31604	1A	1A_IWB31604	483923104	62.97	79.458		20633	1A	1A_IWB20633	23130893	38.68	48.9475		2105	1A	1A_IWB2105	12916455	23.19	36.1552
4238	1A	1A_IWB4238	512635708	62.97	74.3716		26042	1A	1A_IWB26042	23131262	38.68	48.9475		21572	1A	1A_IWB21572	13008267	23.19	31.9824
64622	1A	1A_IWB64622	488070209	65.26	78.3342		80744	1A	1A_IWA7377	24944403	42.41	51.9432		43005	1A	1A_IWB43005	13663567	23.19	32.9838
55442	1A	1A_IWB55442	491130184	65.85	79.1892		76219	1A	1A_IWA1388	25543187	42.41	51.0947		46667	1A	1A_IWB46667	13670677	23.19
77165	1A	1A_IWA2598	492123959	65.85	79.1892		78358	1A	1A_IWA4164	26959380	42.88	51.9432		21945	1A	1A_IWB21945	13671747	24.31	43.8584
77009	1A	1A_IWA2394	495447421	66.45	79.5908		78357	1A	1A_IWA4163	26960753	42.88	51.0947		28635	1A	1A_IWB28635	13673697	24.31	41.2129
35897	1A	1A_IWB35897	496478834	69.72	80.7955		28549	1A	1A_IWB28549	28620484	43.34	52.5488		12040	1A	1A_IWB12040	14046420	24.31	60.6243
81102	1A	1A_IWA7868	500980417	74.27	82.907		3294	1A	1A_IWB3294	28626883	43.34	52.5488		36835	1A	1A_IWB36835	12585383	25.26	36.1552
10113	1A	1A_IWB10113	505338262	74.93	83.7037		73652	1A	1A_IWB73652	29611921	44.74	57.9313		63553	1A	1A_IWB63553	15345434	27.57
43631	1A	1A_IWB43631	505672046	74.93	83.7037		76755	1A	1A_IWA2056	28203073	45.25	65.1341		71359	1A	1A_IWB71359_1	20518950	31.11	71.6619
51439	1A	1A_IWB51439	506282326	74.93	88.8503		81049	1A	1A_IWA7796	29191797	46.24	53.6175		71359	1A	1A_IWB71359_2	20518950	31.11	71.6619
25493	1A	1A_IWB25493	506855550	74.93	84.8923		63846	1A	1A_IWB63846	29280638	46.24			9029	1A	1A_IWB9029	22330782	35.24	47.04
75965	1A	1A_IWA931	508527866	74.93	84.6299		46199	1A	1A_IWB46199	25485067	47.24			20633	1A	1A_IWB20633	23130893	38.64	48.9475
38369	1A	1A_IWB38369	513662375	77.03	86.1391		48819	1A	1A_IWB48819	29191725	48.91	54.3786		26042	1A	1A_IWB26042	23131262	38.64	48.9475
52379	1A	1A_IWB52379	513894012	77.03	87.4572		75585	1A	1A_IWA360	31780988	53.63	55.1785		80744	1A	1A_IWA7377	24944403	52.74	51.9432
77081	1A	1A_IWA2485	514137547	78.27	87.8588		45604	1A	1A_IWB45604	32894232	54.56			76219	1A	1A_IWA1388	25543187	42.37	51.0947
40049	1A	1A_IWB40049	514136602	78.82	87.8588		47786	1A	1A_IWB47786	35935991	56.74	62.5805		78358	1A	1A_IWA4164	26959380	42.84	51.9432
60627	1A	1A_IWB60627	515553365	78.82	88.024		32899	1A	1A_IWB32899	35534613	58.64			78357	1A	1A_IWA4163	26960753	42.84	51.0947
6935	1A	1A_IWB6935	516373257	79.47			68106	1A	1A_IWB68106	33372421	60.32	56.814		41059	1A	1A_IWB41059	27392674	43.3	53.7179
75757	1A	1A_IWA601	516787625	80.79			36939	1A	1A_IWB36939	36267889	60.32			1739	1A	1A_IWB1739	28361226	43.3
23141	1A	1A_IWB23141	517488745	81.36	91.9977		77089	1A	1A_IWA2496	39199074	62.17			40979	1A	1A_IWB40979	28614097	43.3	52.5488
58118	1A	1A_IWB58118	517489260	81.36	91.9977		64888	1A	1A_IWB64888	41744193	64.02	62.6369		28549	1A	1A_IWB28549	28620484	43.3	52.5488
58119	1A	1A_IWB58119	517489581	81.36	91.9977		48461	1A	1A_IWB48461	44364150	64.02			3294	1A	1A_IWB3294	28626883	43.3	52.5488
24863	1A	1A_IWB24863	520579865	84.49	93.6105		49926	1A	1A_IWB49926	42139450	64.64	62.7535		73652	1A	1A_IWB73652	29611921	44.7	57.9313
67661	1A	1A_IWB67661	522234198	86.65	94.4557		73772	1A	1A_IWB73772	45796984	65.25			76755	1A	1A_IWA2056	28203073	45.21	65.1341
13768	1A	1A_IWB13768	522560118	86.65	94.4557		51667	1A	1A_IWB51667	46238736	65.25	65.435		81049	1A	1A_IWA7796	29191797	46.2	53.6175
77125	1A	1A_IWA2541	527178181	86.65	95.5536		28824	1A	1A_IWB28824	49252857	66.18	65.435		63846	1A	1A_IWB63846	29280638	46.2
80175	1A	1A_IWA6624	528668864	86.65	95.2006		53442	1A	1A_IWB53442	58704729	68.96	70.1018		46199	1A	1A_IWB46199	25485067	47.2
60784	1A	1A_IWB60784	530213616	86.65	95.2006		36144	1A	1A_IWB36144	92567918	69.9	70.1018		48819	1A	1A_IWB48819	29191725	48.87	54.3786
77766	1A	1A_IWA3405	530233351	86.65	95.2006		9895	1A	1A_IWB9895	94120880	69.9	70.5228		12251	1A	1A_IWB12251	24321355	51.89	51.5092
80890	1A	1A_IWA7570	530236430	86.65	95.2006		5974	1A	1A_IWB5974	155840884	70.87	70.9114		54638	1A	1A_IWB54638	25541241	52.74	51.9432
75572	1A	1A_IWA339	521339698	87.27	93.6105		80991	1A	1A_IWA7715	114062296	71.82	70.8434		80500	1A	1A_IWA7050	25708710	52.74	51.9432
8167	1A	1A_IWB8167	522500993	87.27	94.4557		39081	1A	1A_IWB39081	182069951	71.82	70.8434		47586	1A	1A_IWB47586	26958877	52.74	51.0947
31945	1A	1A_IWB31945	531605234	87.96	96.6774		11462	1A	1A_IWB11462	281657026	72.29	70.7851		60691	1A	1A_IWB60691	26961620	52.74	51.9432
75699	1A	1A_IWA530	531643079	87.96	96.8361		76700	1A	1A_IWA1990	306112162	73.7	70.7851		75585	1A	1A_IWA360	31780988	52.46	55.1785
38341	1A	1A_IWB38341	531644393	87.96	96.8361		77489	1A	1A_IWA3048	320224007	75.9	65.4206		45604	1A	1A_IWB45604	32894232	53.85
13749	1A	1A_IWB13749	532090234	88.55	101.192		3507	1A	1A_IWB3507	354938468	76.47	70.6167		3419	1A	1A_IWB3419	31779240	55.59	55.1785
4630	1A	1A_IWB4630	531682521	89.14	96.3049		65878	1A	1A_IWB65878	397773589	84.18	71.0474		31602	1A	1A_IWB31602	32087536	55.59	55.1785
80409	1A	1A_IWA6934	532921523	89.8	101.192		69187	1A	1A_IWB69187	436929798	86.93			47786	1A	1A_IWB47786	35935991	55.68	62.5805
14141	1A	1A_IWB14141	533254365	89.8	101.642		22535	1A	1A_IWB22535	417399680	88.02	73.4764		32899	1A	1A_IWB32899	35534613	57.58
2243	1A	1A_IWB2243	533140383	90.56	101.192		64970	1A	1A_IWB64970	424803886	88.02	71.0474		68106	1A	1A_IWB68106	33372421	59.26	56.814
78644	1A	1A_IWA4537	533447686	91.53	102.646		65579	1A	1A_IWB65579	430179951	88.49	73.4764		36939	1A	1A_IWB36939	36267889	59.26
45538	1A	1A_IWB45538	533902154	92.23	101.908		74073	1A	1A_IWB74073	432586390	88.95	73.4764		77089	1A	1A_IWA2496	39199074	61.11
54196	1A	1A_IWB54196	533902931	92.23	101.943		71397	1A	1A_IWB71397	432634528	88.95	73.4764		64888	1A	1A_IWB64888	41744193	62.96	62.6369
52875	1A	1A_IWB52875	592360262	92.23	90.5951		42791	1A	1A_IWB42791	434873788	90.34	73.4764		48461	1A	1A_IWB48461	44364150	62.96
28573	1A	1A_IWB28573	534241429	92.84			79268	1A	1A_IWA5310	441235985	90.81	73.3047		49926	1A	1A_IWB49926	42139450	63.58	62.7535
45987	1A	1A_IWB45987	534931318	92.84	102.617		2927	1A	1A_IWB2927	535431480	90.81	71.0474		73772	1A	1A_IWB73772	45796984	64.19
31771	1A	1A_IWB31771	536614283	93.98	104.145		36443	1A	1A_IWB36443	461047793	92.68	73.9816		51667	1A	1A_IWB51667	46238736	64.19	65.435
75825	1A	1A_IWA691	544054450	97.63	110.678		78484	1A	1A_IWA4327	462435213	93.14	71.096		28824	1A	1A_IWB28824	49252857	65.12	65.435
10986	1A	1A_IWB10986	544055675	97.63	110.678		65944	1A	1A_IWB65944	465505646	95.08	74.7297		53442	1A	1A_IWB53442	58704729	67.9	70.1018
72959	1A	1A_IWB72959	545334566	98.71	111.552		35927	1A	1A_IWB35927	471488518	95.57	76.1417		36144	1A	1A_IWB36144	92567918	68.84	70.1018
66484	1A	1A_IWB66484	545528860	98.71	110.205		21382	1A	1A_IWB21382	471700415	95.57	76.1417		9895	1A	1A_IWB9895	94120880	68.84	70.5228
59501	1A	1A_IWB59501	545891404	98.71	110.678		44485	1A	1A_IWB44485	474642192	96.05	76.838		5974	1A	1A_IWB5974	155840884	69.81	70.9114
34750	1A	1A_IWB34750	546036276	98.71	110.917		40291	1A	1A_IWB40291	477654671	96.05	77.7836		80991	1A	1A_IWA7715	114062296	70.76	70.8434
76547	1A	1A_IWA1790	546044424	98.71	110.678		74613	1A	1A_IWB74613	480829320	96.57	77.8225		39081	1A	1A_IWB39081	182069951	70.76	70.8434
51733	1A	1A_IWB51733	546044483	98.71	110.678		58391	1A	1A_IWB58391	480596269	97.13	77.7836		11462	1A	1A_IWB11462	281657026	71.23	70.7851
27519	1A	1A_IWB27519	546212974	98.71	110.678		8255	1A	1A_IWB8255	480755283	97.63	74.7847		76700	1A	1A_IWA1990	306112162	72.64	70.7851
80443	1A	1A_IWA6975	547255492	99.25	111.552		11516	1A	1A_IWB11516	481655155	98.55	74.7847		77489	1A	1A_IWA3048	320224007	74.84	65.4206
72519	1A	1A_IWB72519	547725149	99.25			39171	1A	1A_IWB39171	481685150	99.01	82.3833		3507	1A	1A_IWB3507	354938468	75.41	70.6167
9961	1A	1A_IWB9961	547906982	99.25	130.086		70213	1A	1A_IWB70213	481757546	99.01	74.7847		74868	1A	1A_IWB74868	458397080	80	74.7297
39248	1A	1A_IWB39248	547964005	99.25	115.723		79988	1A	1A_IWA6372	482337539	99.01	77.7836		7022	1A	1A_IWB7022	465131790	80
77556	1A	1A_IWA3145	547966044	99.25	130.086		5406	1A	1A_IWB5406	482761802	99.01	74.7847		36584	1A	1A_IWB36584	474642165	80.67	124.808
54366	1A	1A_IWB54366	549313790	99.25	113.77		80272	1A	1A_IWA6751	485343051	99.49	78.3342		78371	1A	1A_IWA4179	480831300	80.67	77.7836
52703	1A	1A_IWB52703	549704338	99.25	118.829		78875	1A	1A_IWA4816	485343698	99.49	78.3342		78330	1A	1A_IWA4126	481692078	80.67	77.7836
77296	1A	1A_IWA2783	549845289	99.25	115.39		7921	1A	1A_IWB7921	484328730	99.95	78.3342		34496	1A	1A_IWB34496	482278982	80.67	74.7847
77297	1A	1A_IWA2784	549846677	99.25	127.855		35691	1A	1A_IWB35691	492807667	102.27	78.3342		31604	1A	1A_IWB31604	483923104	80.67	79.458
62509	1A	1A_IWB62509	551321974	99.25	115.646		31863	1A	1A_IWB31863	493210518	102.27	78.3342		4238	1A	1A_IWB4238	512635708	80.67	74.3716
52276	1A	1A_IWB52276	551461696	99.25	115.39		52858	1A	1A_IWB52858	493510006	103.37	79.5908		65878	1A	1A_IWB65878	397773589	81.36	71.0474
51279	1A	1A_IWB51279	551533722	99.25	108.414		34337	1A	1A_IWB34337	496308625	103.93	80.5429		64622	1A	1A_IWB64622	488070209	84.16	78.3342
39439	1A	1A_IWB39439	551609890	99.25	116.183		35039	1A	1A_IWB35039	496311634	103.93	80.7955		69187	1A	1A_IWB69187	436929798	84.11
66931	1A	1A_IWB66931	554208204	99.25	117.819		35897	1A	1A_IWB35897	496478834	103.93	80.7955		55442	1A	1A_IWB55442	491130184	84.75	79.1892
58389	1A	1A_IWB58389	558489897	99.25	119.891		43838	1A	1A_IWB43838	498536695	105.69	82.907		77165	1A	1A_IWA2598	492123959	84.75	79.1892
76404	1A	1A_IWA1618	558515681	99.25	113.813		62117	1A	1A_IWB62117	498811359	106.16	82.907		77009	1A	1A_IWA2394	495447421	85.35	79.5908
10613	1A	1A_IWB10613	558536628	99.25	113.77		65763	1A	1A_IWB65763	499621586	106.62	82.907		22535	1A	1A_IWB22535	417399680	85.51	73.4764
73626	1A	1A_IWB73626	558591873	99.25	132.758		75446	1A	1A_IWA163	501031123	107.09	82.907		64970	1A	1A_IWB64970	424803886	85.51	71.0474
73444	1A	1A_IWB73444	558977996	99.25	113.77		75722	1A	1A_IWA560	503369210	107.09	83.7037		65579	1A	1A_IWB65579	430179951	85.98	73.4764
8695	1A	1A_IWB8695	560463557	99.25	113.453		11083	1A	1A_IWB11083	503381202	107.09			74073	1A	1A_IWB74073	432586390	86.44	73.4764
80784	1A	1A_IWA7428	564302528	99.25	125.17		56353	1A	1A_IWB56353	504242218	107.09	83.7037		71397	1A	1A_IWB71397	432634528	86.44	73.4764
23299	1A	1A_IWB23299	564749321	99.25	113.194		74828	1A	1A_IWB74828	505270073	108.49	83.7037		42791	1A	1A_IWB42791	434873788	87.83	73.4764
45491	1A	1A_IWB45491	564749792	99.25	115.723		57297	1A	1A_IWB57297	505282998	108.49			79268	1A	1A_IWA5310	441235985	88.3	73.3047
10092	1A	1A_IWB10092	565360200	99.25	15.8564		44918	1A	1A_IWB44918	505526664	108.96	83.7037		2927	1A	1A_IWB2927	535431480	88.3	71.0474
72163	1A	1A_IWB72163	566011001	99.25	127.732		10113	1A	1A_IWB10113	505338262	109.45	83.7037		36443	1A	1A_IWB36443	461047793	90.17	73.9816
61310	1A	1A_IWB61310	566640169	99.25	130.086		51039	1A	1A_IWB51039	505471337	109.45	83.7037		78484	1A	1A_IWA4327	462435213	90.63	71.096
26549	1A	1A_IWB26549	567973397	99.25	130.086		40044	1A	1A_IWB40044	505513074	109.45	83.4252		65944	1A	1A_IWB65944	465505646	92.57	74.7297
11057	1A	1A_IWB11057	568013275	99.25	130.086		7753	1A	1A_IWB7753	508638227	109.91	84.3255		35927	1A	1A_IWB35927	471488518	93.06	76.1417
28698	1A	1A_IWB28698	568017209	99.25	130.086		47335	1A	1A_IWB47335	508962300	110.46			21382	1A	1A_IWB21382	471700415	93.06	76.1417
50952	1A	1A_IWB50952	568074322	99.25	130.086		72551	1A	1A_IWB72551	514887900	112.82	81.609		44485	1A	1A_IWB44485	474642192	93.54	76.838
43028	1A	1A_IWB43028	568110790	99.25	130.326		79855	1A	1A_IWA6145	514138226	113.32	87.8588		40291	1A	1A_IWB40291	477654671	93.54	77.7836
65681	1A	1A_IWB65681	570426189	99.25	127.732		72548	1A	1A_IWB72548	515144621	113.9			74613	1A	1A_IWB74613	480829320	94.06	77.8225
73557	1A	1A_IWB73557	571291310	99.25	131.557		54227	1A	1A_IWB54227	518019189	116.2	91.9977		58391	1A	1A_IWB58391	480596269	94.62	77.7836
80697	1A	1A_IWA7316	571291569	99.25	130.086		78978	1A	1A_IWA4955	519469969	117.63	91.7612		8255	1A	1A_IWB8255	480755283	95.12	74.7847
2902	1A	1A_IWB2902	571788143	99.25	115.723		55	1A	1A_IWB55	520412991	118.11	93.6105		11516	1A	1A_IWB11516	481655155	96.04	74.7847
3351	1A	1A_IWB3351	572020396	99.25	113.813		34600	1A	1A_IWB34600	520413077	118.11	93.6105		39171	1A	1A_IWB39171	481685150	96.5	82.3833
14279	1A	1A_IWB14279	573233513	99.25	130.086		439	1A	1A_IWB439	520579765	119.03	93.6105		70213	1A	1A_IWB70213	481757546	96.5	74.7847
34929	1A	1A_IWB34929	575215821	100.72	134.248		24863	1A	1A_IWB24863	520579865	119.03	93.6105		79988	1A	1A_IWA6372	482337539	96.5	77.7836
78937	1A	1A_IWA4898	577840967	105.94	137.205		9631	1A	1A_IWB9631	522980590	120.53	94.2841		5406	1A	1A_IWB5406	482761802	96.5	74.7847
80110	1A	1A_IWA6530	578563413	106.67	137.205		13379	1A	1A_IWB13379	527178211	121.03	94.4557		80272	1A	1A_IWA6751	485343051	96.98	78.3342
53222	1A	1A_IWB53222	579830514	107.44	139.744		79438	1A	1A_IWA5533	530212408	121.5	96.007		78875	1A	1A_IWA4816	485343698	96.98	78.3342
6426	1A	1A_IWB6426	579830592	107.44	139.744		62844	1A	1A_IWB62844	530212417	121.5			7921	1A	1A_IWB7921	484328730	97.44	78.3342
78249	1A	1A_IWA4022	579864365	107.44	145.759		80934	1A	1A_IWA7639	531051927	147.75	101.192		35691	1A	1A_IWB35691	492807667	99.76	78.3342
11395	1A	1A_IWB11395	580422490	107.44	139.744		42110	1A	1A_IWB42110	531230792	147.75	88.5017		31863	1A	1A_IWB31863	493210518	99.76	78.3342
12340	1A	1A_IWB12340	581828997	107.44	140.929		52902	1A	1A_IWB52902	531237231	147.75			52858	1A	1A_IWB52858	493510006	100.86	79.5908
38852	1A	1A_IWB38852	581830214	107.44	170.797		13749	1A	1A_IWB13749	532090234	148.21	101.192		34337	1A	1A_IWB34337	496308625	101.42	80.5429
77747	1A	1A_IWA3377	579299322	108.08	137.12		81346	1A	1A_IWA8212	532246717	148.21	99.0124		35039	1A	1A_IWB35039	496311634	101.42	80.7955
52856	1A	1A_IWB52856	582864991	111.39	165.012		11513	1A	1A_IWB11513	532253659	148.68	99.0124		35897	1A	1A_IWB35897	496478834	101.42	80.7955
72943	1A	1A_IWB72943	582867330	111.39	163.855		6984	1A	1A_IWB6984	535027925	151.5			43838	1A	1A_IWB43838	498536695	103.18	82.907
45411	1A	1A_IWB45411	583291151	111.39	142.309		26708	1A	1A_IWB26708	535078549	152.46			62117	1A	1A_IWB62117	498811359	103.65	82.907
34474	1A	1A_IWB34474	583660923	111.39	142.62		46690	1A	1A_IWB46690	535079313	152.46	102.918		65763	1A	1A_IWB65763	499621586	104.11	82.907
44568	1A	1A_IWB44568	583925902	112.56	164.726		55855	1A	1A_IWB55855	535324125	152.46	102.918		75446	1A	1A_IWA163	501031123	104.58	82.907
8006	1A	1A_IWB8006	587360579	115.84	149.819		4307	1A	1A_IWB4307	540150500	156.66	105.742		75722	1A	1A_IWA560	503369210	104.58	83.7037
80677	1A	1A_IWA7289	589028327	118.18	161.355		79050	1A	1A_IWA5047	541468767	158.04	107.663		11083	1A	1A_IWB11083	503381202	104.58
34353	1A	1A_IWB34353	589874499	118.84	152.682		53529	1A	1A_IWB53529	541632726	158.04	107.663		56353	1A	1A_IWB56353	504242218	104.58	83.7037
22117	1A	1A_IWB22117	590002741	118.84	139.744		64984	1A	1A_IWB64984	541990759	158.5	108.174		74828	1A	1A_IWB74828	505270073	105.98	83.7037
45352	1A	1A_IWB45352	590343150	118.84	152.682		64983	1A	1A_IWB64983	541991897	158.5	108.058		57297	1A	1A_IWB57297	505282998	105.98
56272	1A	1A_IWB56272	591090300	119.97	155.8		51733	1A	1A_IWB51733	546044483	163.21	110.678		81102	1A	1A_IWA7868	500980417	106.15	82.907
57932	1A	1A_IWB57932	591095673	119.97	155.8		27519	1A	1A_IWB27519	546212974	163.71	110.678		44918	1A	1A_IWB44918	505526664	106.45	83.7037
78213	1A	1A_IWA3977	592313196	121.42	155.8		46495	1A	1A_IWB46495	546520068	163.71	111.51		10113	1A	1A_IWB10113	505338262	106.94	83.7037
36466	1B	1B_IWB36466	5159773	0	9.67858		5566	1A	1A_IWB5566	547215707	164.64	111.432		51039	1A	1A_IWB51039	505471337	106.94	83.7037
7076	1B	1B_IWB7076	8559748	12.61	30.3377		80443	1A	1A_IWA6975	547255492	164.64	111.552		40044	1A	1A_IWB40044	505513074	106.94	83.4252
38627	1B	1B_IWB38627	9548231	13.84	24.5459		14450	1A	1A_IWB14450	547215814	166.16			43631	1A	1A_IWB43631	505672046	106.94	83.7037
45439	1B	1B_IWB45439	9672889	13.84	21.8005		77967	1A	1A_IWA3660	575228795	206.76	137.003		51439	1A	1A_IWB51439	506282326	106.94	88.8503
5922	1B	1B_IWB5922	9711366	13.84	27.6412		34929	1A	1A_IWB34929	575215821	209.57	134.248		25493	1A	1A_IWB25493	506855550	106.94	84.8923
48324	1B	1B_IWB48324	9711621	13.84	27.6157		29697	1A	1A_IWB29697	575228835	209.57	134.248		75965	1A	1A_IWA931	508527866	106.94	84.6299
10492	1B	1B_IWB10492	10102105	15.11	41.2129		54198	1A	1A_IWB54198	575363755	209.57	134.248		7753	1A	1A_IWB7753	508638227	107.4	84.3255
71754	1B	1B_IWB71754	10103946	15.11	41.2129		58979	1A	1A_IWB58979	577841655	212.36	137.12		47335	1A	1A_IWB47335	508962300	107.95
6008	1B	1B_IWB6008	11634673	15.11	41.2129		77747	1A	1A_IWA3377	579299322	212.36	137.12		38369	1A	1A_IWB38369	513662375	109.05	86.1391
53314	1B	1B_IWB53314	11696983	15.11	31.0397		45182	1A	1A_IWB45182	592185947	214.67	151.254		52379	1A	1A_IWB52379	513894012	109.05	87.4572
12208	1B	1B_IWB12208	10359531	15.72	41.4714		3413	1A	1A_IWB3413	589023953	215.15	154.061		77081	1A	1A_IWA2485	514137547	110.29	87.8588
12602	1B	1B_IWB12602	10361195	15.72	41.2129		76422	1A	1A_IWA1644	590001461	216.12	154.554		72551	1A	1A_IWB72551	514887900	110.31	81.609
7884	1B	1B_IWB7884	11181523	15.72	41.2129		80396	1A	1A_IWA6916	590001977	216.12	153.197		79855	1A	1A_IWA6145	514138226	110.81	87.8588
38368	1B	1B_IWB38368	11859756	15.72	41.2129		22117	1A	1A_IWB22117	590002741	216.12	139.744		40049	1A	1A_IWB40049	514136602	110.84	87.8588
11603	1B	1B_IWB11603	11621389	17.46	141.352		9978	1A	1A_IWB9978	156063435	217.16	151.96		60627	1A	1A_IWB60627	515553365	110.84	88.024
73945	1B	1B_IWB73945	17810037	22.38	45.4284		10491	1A	1A_IWB10491	586914403	218.69	149.819		72548	1A	1A_IWB72548	515144621	111.39
48067	1B	1B_IWB48067	17810101	22.38	39.5536		11851	1B	1B_IWB11851	99712980	0	64.46		6935	1A	1A_IWB6935	516373257	111.49
72107	1B	1B_IWB72107	20588217	22.38	43.8584		9362	1B	1B_IWB9362	37114004	3.29	176.3		75757	1A	1A_IWA601	516787625	112.81
11671	1B	1B_IWB11671	20589360	22.38			46756	1B	1B_IWB46756	70327929	5.42	59.4724		23141	1A	1A_IWB23141	517488745	113.38	91.9977
80710	1B	1B_IWA7331	20594497	22.38	43.8584		76973	1B	1B_IWA2345	94977942	5.42	62.5805		58118	1A	1A_IWB58118	517489260	113.38	91.9977
75093	1B	1B_IWB75093	24932284	24.75	60.6243		80897	1B	1B_IWA7578	119622027	5.42	60.6243		58119	1A	1A_IWB58119	517489581	113.38	91.9977
72786	1B	1B_IWB72786	28561000	25.53	53.371		41878	1B	1B_IWB41878	94977286	5.9	62.5805		54227	1A	1A_IWB54227	518019189	113.69	91.9977
31417	1B	1B_IWB31417	28764697	26.16	53.3487		35285	1B	1B_IWB35285	120398623	6.38	62.5805		78978	1A	1A_IWA4955	519469969	115.12	91.7612
7923	1B	1B_IWB7923	38910632	28.76	56.6482		78304	1B	1B_IWA4093	112203159	6.88	62.839		55	1A	1A_IWB55	520412991	115.6	93.6105
48577	1B	1B_IWB48577	40199660	28.76	56.8812		12440	1B	1B_IWB12440	111368162	7.44			34600	1A	1A_IWB34600	520413077	115.6	93.6105
31874	1B	1B_IWB31874	40942876	28.76	56.8812		62999	1B	1B_IWB62999	280163250	11.06			439	1A	1A_IWB439	520579765	116.52	93.6105
21709	1B	1B_IWB21709	42016061	29.45			31876	1B	1B_IWB31876	234251759	12.19			24863	1A	1A_IWB24863	520579865	116.52	93.6105
74006	1B	1B_IWB74006	42350904	29.45			31877	1B	1B_IWB31877	234251783	12.19	70.1018		9631	1A	1A_IWB9631	522980590	118.02	94.2841
63847	1B	1B_IWB63847	46883147	29.45	56.7344		12443	1B	1B_IWB12443	234251835	12.19	63.8569		13379	1A	1A_IWB13379	527178211	118.52	94.4557
69962	1B	1B_IWB69962	50183768	30.07	60.6243		36558	1B	1B_IWB36558	269648202	12.19			79438	1A	1A_IWA5533	530212408	118.99	96.007
10754	1B	1B_IWB10754	51990806	30.66	56.8812		6139	1B	1B_IWB6139	290127040	13.25			62844	1A	1A_IWB62844	530212417	118.99
10806	1B	1B_IWB10806	51990850	30.66			56965	1B	1B_IWB56965	326918373	13.25	64.0994		67661	1A	1A_IWB67661	522234198	131.71	94.4557
76371	1B	1B_IWA1578	52901757	30.66	60.6243		55154	1B	1B_IWB55154	327233912	13.25	64.8908		13768	1A	1A_IWB13768	522560118	131.71	94.4557
76671	1B	1B_IWA1947	53052373	30.66			61739	1B	1B_IWB61739	328824385	14.93			77125	1A	1A_IWA2541	527178181	131.71	95.5536
73550	1B	1B_IWB73550	53248886	30.66	57.596		31638	1B	1B_IWB31638	390098427	26.5			80175	1A	1A_IWA6624	528668864	131.71	95.2006
80045	1B	1B_IWA6450	56313047	30.66	57.596		24627	1B	1B_IWB24627	540279885	33.2	70.0795		60784	1A	1A_IWB60784	530213616	131.71	95.2006
78616	1B	1B_IWA4504	56314807	30.66			28554	1B	1B_IWB28554	482164712	34.3	70.0795		77766	1A	1A_IWA3405	530233351	131.71	95.2006
42781	1B	1B_IWB42781	56879637	30.66	60.6243		60913	1B	1B_IWB60913	487406389	36.09	72.1538		80890	1A	1A_IWA7570	530236430	131.71	95.2006
28624	1B	1B_IWB28624	57003287	30.66	59.6995		55419	1B	1B_IWB55419	228560592	41.32	77.3935		75572	1A	1A_IWA339	521339698	132.33	93.6105
7023	1B	1B_IWB7023	57430608	32.04	57.596		10066	1B	1B_IWB10066	543517602	41.32	75.1023		8167	1A	1A_IWB8167	522500993	132.33	94.4557
47932	1B	1B_IWB47932	58754069	32.04	57.596		74237	1B	1B_IWB74237	505283378	41.88			31945	1A	1A_IWB31945	531605234	133.02	96.6774
49337	1B	1B_IWB49337	58754108	32.04	57.3088		55418	1B	1B_IWB55418	638308782	42.44	75.1023		75699	1A	1A_IWA530	531643079	133.02	96.8361
80554	1B	1B_IWA7117	59592676	32.04	57.596		69319	1B	1B_IWB69319	572342634	42.98	78.4498		38341	1A	1A_IWB38341	531644393	133.02	96.8361
58093	1B	1B_IWB58093	71623729	32.04	60.6243		42085	1B	1B_IWB42085	548968557	43.52	78.4498		80934	1A	1A_IWA7639	531051927	140.77	101.192
45038	1B	1B_IWB45038	59196975	32.62	57.3088		12813	1B	1B_IWB12813	549794625	43.52	78.4498		42110	1A	1A_IWB42110	531230792	140.77	88.5017
77150	1B	1B_IWA2577	59593301	33.2	57.596		10372	1B	1B_IWB10372	551221687	43.52			52902	1A	1A_IWB52902	531237231	140.77
31762	1B	1B_IWB31762	54461810	36.3			71352	1B	1B_IWB71352	548623862	45.01	78.4498		13749	1A	1A_IWB13749	532090234	141.23	101.192
32564	1B	1B_IWB32564	98168686	38.23			40125	1B	1B_IWB40125	548623862	45.01	78.4498		81346	1A	1A_IWA8212	532246717	141.23	99.0124
23428	1B	1B_IWB23428	114343934	38.81	63.7325		67865	1B	1B_IWB67865	573571920	48.5	86.0733		11513	1A	1A_IWB11513	532253659	141.7	99.0124
7193	1B	1B_IWB7193	115951864	39.37	62.6379		70039	1B	1B_IWB70039	566838457	49.02	84.4331		6984	1A	1A_IWB6984	535027925	144.52
67341	1B	1B_IWB67341	113815138	40.56	59.9351		70038	1B	1B_IWB70038	566838725	49.02	84.4331		4630	1A	1A_IWB4630	531682521	144.55	96.3049
40637	1B	1B_IWB40637	130007853	41.19	43.8584		29347	1B	1B_IWB29347	566840473	49.02	84.4331		80409	1A	1A_IWA6934	532921523	145.21	101.192
38539	1B	1B_IWB38539	136650758	41.19	62.9507		77588	1B	1B_IWA3189	581693720	50.04	87.2955		14141	1A	1A_IWB14141	533254365	145.21	101.642
39791	1B	1B_IWB39791	137154068	42.41	62.6379		54518	1B	1B_IWB54518	598381224	57.52	130.086		26708	1A	1A_IWB26708	535078549	145.39
81153	1B	1B_IWA7934	151463896	43.7	64.46		54519	1B	1B_IWB54519	598381336	58.17			46690	1A	1A_IWB46690	535079313	145.39	102.918
72311	1B	1B_IWB72311	290125941	44.87	70.1018		13742	1B	1B_IWB13742	598381569	58.17	95.487		55855	1A	1A_IWB55855	535324125	145.39	102.918
70284	1B	1B_IWB70284	297728896	44.87	64.0994		63852	1B	1B_IWB63852	600891127	58.73	95.4168		2243	1A	1A_IWB2243	533140383	146	101.192
72755	1B	1B_IWB72755	308588150	44.87	64.0994		75930	1B	1B_IWA858	622219011	60	96.1635		78644	1A	1A_IWA4537	533447686	146.97	102.646
20988	1B	1B_IWB20988	322937664	44.87			60066	1B	1B_IWB60066	608995839	60.61			45538	1A	1A_IWB45538	533902154	147.67	101.908
38766	1B	1B_IWB38766	325289356	44.87			3934	1B	1B_IWB3934	637369236	80.03	109.697		54196	1A	1A_IWB54196	533902931	147.67	101.943
78532	1B	1B_IWA4389	326783444	44.87	64.8908		41690	1B	1B_IWB41690	637596852	80.53	110.926		52875	1A	1A_IWB52875	592360262	147.67	90.5951
48664	1B	1B_IWB48664	329488001	45.65	64.8908		74754	1B	1B_IWB74754	637621986	80.53	109.697		28573	1A	1A_IWB28573	534241429	148.28
78993	1B	1B_IWA4975	331423186	45.65	64.8908		34585	1B	1B_IWB34585	637944995	80.53	110.926		45987	1A	1A_IWB45987	534931318	148.28	102.617
7205	1B	1B_IWB7205	334549974	46.91	66.0715		3768	1B	1B_IWB3768	640853587	82.04	118.829		4307	1A	1A_IWB4307	540150500	149.38	105.742
63332	1B	1B_IWB63332	336648484	46.91			77670	1B	1B_IWA3284	640853587	83.54	118.829		31771	1A	1A_IWB31771	536614283	149.46	104.145
35618	1B	1B_IWB35618	342648038	46.91	65.3567		1371	1B	1B_IWB1371	640508532	84.56	114.129		79050	1A	1A_IWA5047	541468767	150.71	107.663
7211	1B	1B_IWB7211	344044080	46.91			79698	1B	1B_IWA5900	640853347	84.56	114.129		53529	1A	1A_IWB53529	541632726	150.71	107.663
69305	1B	1B_IWB69305	347021397	46.91	69.9252		77524	1B	1B_IWA3097	640856172	84.56	113.842		64984	1A	1A_IWB64984	541990759	151.17	108.174
78783	1B	1B_IWA4706	348797994	46.91	66.0715		77523	1B	1B_IWA3096	640857501	84.56	114.085		64983	1A	1A_IWB64983	541991897	151.17	108.058
20542	1B	1B_IWB20542	367439573	46.91	65.4206		80573	1B	1B_IWA7141	643096819	87.36	115.881		75825	1A	1A_IWA691	544054450	153.25	110.678
37118	1B	1B_IWB37118	402143932	46.91	66.9044		65867	1B	1B_IWB65867	643097046	87.36	115.881		10986	1A	1A_IWB10986	544055675	153.25	110.678
20717	1B	1B_IWB20717	365692953	47.53			24341	1B	1B_IWB24341	643102204	87.36	115.881		51733	1A	1A_IWB51733	546044483	154.33	110.678
6815	1B	1B_IWB6815	406042964	48.18	67.1406		46686	1B	1B_IWB46686	646167745	89.21	118.23		72959	1A	1A_IWB72959	545334566	154.83	111.552
11881	1B	1B_IWB11881	409630041	48.18	67.1406		5810	1B	1B_IWB5810	646172198	89.21	118.919		66484	1A	1A_IWB66484	545528860	154.83	110.205
12002	1B	1B_IWB12002	407544322	48.76	67.1406		75829	1B	1B_IWA696	646167658	89.68	118.287		59501	1A	1A_IWB59501	545891404	154.83	110.678
8804	1B	1B_IWB8804	412895506	50.11	67.3767		13876	1B	1B_IWB13876	646167658	89.68	118.287		34750	1A	1A_IWB34750	546036276	154.83	110.917
35871	1B	1B_IWB35871	419203671	50.11	67.3767		36030	1B	1B_IWB36030	651557802	93.85	121.306		76547	1A	1A_IWA1790	546044424	154.83	110.678
10997	1B	1B_IWB10997	430168568	51.83	68.7521		76572	1B	1B_IWA1825	652455270	93.85	122.519		27519	1A	1A_IWB27519	546212974	154.83	110.678
74145	1B	1B_IWB74145	445180564	52.4	70.0795		35065	1B	1B_IWB35065	652457867	93.85	122.519		46495	1A	1A_IWB46495	546520068	154.83	111.51
73167	1B	1B_IWB73167	447323307	52.4	70.0795		35891	1B	1B_IWB35891	653185853	93.85	122.519		5566	1A	1A_IWB5566	547215707	155.5	111.432
9703	1B	1B_IWB9703	448141350	52.4	70.0795		76033	1B	1B_IWA1069	653185853	93.85	122.519		80443	1A	1A_IWA6975	547255492	155.5	111.552
77218	1B	1B_IWA2667	451076976	52.4	70.7816		15640	1B	1B_IWB15640	683108684	94.32	122.764		72519	1A	1A_IWB72519	547725149	155.5
39738	1B	1B_IWB39738	452316860	52.4	70.6444		8840	1B	1B_IWB8840	654241389	96.06	126.137		9961	1A	1A_IWB9961	547906982	155.5	130.086
51889	1B	1B_IWB51889	453878508	53.02	70.0795		81298	1B	1B_IWA8139	655272117	97.21			39248	1A	1A_IWB39248	547964005	155.5	115.723
5511	1B	1B_IWB5511	471193698	53.72	76.0916		7459	1B	1B_IWB7459	655781639	97.21	117.812		77556	1A	1A_IWA3145	547966044	155.5	130.086
78387	1B	1B_IWA4197	474451205	53.72	70.0795		73299	1B	1B_IWB73299	655781892	97.21			54366	1A	1A_IWB54366	549313790	155.5	113.77
65832	1B	1B_IWB65832	478055163	53.72	70.0795		41964	1B	1B_IWB41964	655278151	97.21	117.812		52703	1A	1A_IWB52703	549704338	155.5	118.829
44100	1B	1B_IWB44100	488206341	54.42	75.1023		71472	1B	1B_IWB71472	663116963	97.79	85.0057		77296	1A	1A_IWA2783	549845289	155.5	115.39
74758	1B	1B_IWB74758	488455259	54.42	75.2746		8409	1B	1B_IWB8409	655798556	98.92	117.812		77297	1A	1A_IWA2784	549846677	155.5	127.855
51263	1B	1B_IWB51263	488469381	54.42	69.191		74547	1B	1B_IWB74547	656235242	99.4			62509	1A	1A_IWB62509	551321974	155.5	115.646
38741	1B	1B_IWB38741	490452820	54.42	75.1023		26544	1B	1B_IWB26544	677911805	99.4	5.85834		52276	1A	1A_IWB52276	551461696	155.5	115.39
74185	1B	1B_IWB74185	491087439	54.42	74.9396		14791	1B	1B_IWB14791	677912018	99.4	117.812		51279	1A	1A_IWB51279	551533722	155.5	108.414
7183	1B	1B_IWB7183	494159127	54.95	75.1023		10786	1B	1B_IWB10786	658482763	102.22			39439	1A	1A_IWB39439	551609890	155.5	116.183
62507	1B	1B_IWB62507	497781369	54.95	75.1023		10787	1B	1B_IWB10787	658482895	102.22			66931	1A	1A_IWB66931	554208204	155.5	117.819
79833	1B	1B_IWA6107	509892647	54.95	74.1865		77320	1B	1B_IWA2818	658498673	102.22	113.77		58389	1A	1A_IWB58389	558489897	155.5	119.891
80981	1B	1B_IWA7700	511449170	54.95	74.3716		31741	1B	1B_IWB31741	659380843	102.22	130.899		76404	1A	1A_IWA1618	558515681	155.5	113.813
4238	1B	1B_IWB4238	512635708	54.95	74.3716		31742	1B	1B_IWB31742	659380846	102.22	130.899		10613	1A	1A_IWB10613	558536628	155.5	113.77
68593	1B	1B_IWB68593	533963829	56.29	195.099		31740	1B	1B_IWB31740	659381079	102.22	130.899		73626	1A	1A_IWB73626	558591873	155.5	132.758
26192	1B	1B_IWB26192	540730073	57.05	77.6137		31739	1B	1B_IWB31739	659531101	102.22			73444	1A	1A_IWB73444	558977996	155.5	113.77
23636	1B	1B_IWB23636	540847921	57.05	77.6137		73131	1B	1B_IWB73131	660012179	103.18	135.229		8695	1A	1A_IWB8695	560463557	155.5	113.453
32500	1B	1B_IWB32500	544997592	58.16	78.4498		23772	1B	1B_IWB23772	660012310	103.18	135.229		80784	1A	1A_IWA7428	564302528	155.5	125.17
6377	1B	1B_IWB6377	545074573	58.16			73132	1B	1B_IWB73132	660012310	103.18	135.229		23299	1A	1A_IWB23299	564749321	155.5	113.194
34737	1B	1B_IWB34737	545207215	58.16	78.4498		6619	1B	1B_IWB6619	660528121	103.18	132.59		45491	1A	1A_IWB45491	564749792	155.5	115.723
39290	1B	1B_IWB39290	545208141	58.16	78.4498		28819	1B	1B_IWB28819	660529867	103.18	132.134		10092	1A	1A_IWB10092	565360200	155.5	15.8564
49515	1B	1B_IWB49515	545800733	58.16	78.4498		40255	1B	1B_IWB40255	660531687	103.18	132.609		72163	1A	1A_IWB72163	566011001	155.5	127.732
10226	1B	1B_IWB10226	546273043	58.16	78.4498		31646	1B	1B_IWB31646	661515637	103.18	133.26		61310	1A	1A_IWB61310	566640169	155.5	130.086
73745	1B	1B_IWB73745	547584013	58.16	78.4498		42796	1B	1B_IWB42796	660745131	104.26			26549	1A	1A_IWB26549	567973397	155.5	130.086
72079	1B	1B_IWB72079	547968251	58.16	78.4498		11006	1B	1B_IWB11006	662718706	108.18	134.208		11057	1A	1A_IWB11057	568013275	155.5	130.086
10373	1B	1B_IWB10373	551221639	58.16	126.53		11007	1B	1B_IWB11007	662718722	108.18	134.409		28698	1A	1A_IWB28698	568017209	155.5	130.086
78878	1B	1B_IWA4819	553017501	58.16	81.609		73284	1B	1B_IWB73284	662909836	108.18	135.963		50952	1A	1A_IWB50952	568074322	155.5	130.086
10143	1B	1B_IWB10143	554137239	58.16	81.609		36475	1B	1B_IWB36475	666256579	111.25	134.546		43028	1A	1A_IWB43028	568110790	155.5	130.326
43583	1B	1B_IWB43583	557397068	58.16	79.7741		57628	1B	1B_IWB57628	666916680	113.35	137.003		65681	1A	1A_IWB65681	570426189	155.5	127.732
36357	1B	1B_IWB36357	561705199	59.32	80.5814		31755	1B	1B_IWB31755	669029370	118.4	141.825		73557	1A	1A_IWB73557	571291310	155.5	131.557
77987	1B	1B_IWA3684	562375102	59.32	81.609		8812	1B	1B_IWB8812	669650194	118.4	142.664		80697	1A	1A_IWA7316	571291569	155.5	130.086
6730	1B	1B_IWB6730	562893037	59.32	81.609		73865	1B	1B_IWB73865	673180322	118.4	148.398		2902	1A	1A_IWB2902	571788143	155.5	115.723
77253	1B	1B_IWA2717	563027814	59.32	81.609		61210	1B	1B_IWB61210	673743536	118.4	158.591		3351	1A	1A_IWB3351	572020396	155.5	113.813
5796	1B	1B_IWB5796	563028672	59.32	81.609		72918	1B	1B_IWB72918	673784357	118.4	152.85		14279	1A	1A_IWB14279	573233513	155.5	130.086
27998	1B	1B_IWB27998	563030530	59.32	81.609		72919	1B	1B_IWB72919	673784725	118.4	148.398		14450	1A	1A_IWB14450	547215814	157.02
8999	1B	1B_IWB8999	563307053	59.32	81.609		21823	1B	1B_IWB21823	673849321	118.4	152.85		77967	1A	1A_IWA3660	575228795	197.62	137.003
36872	1B	1B_IWB36872	563675946	59.32	81.609		18787	1B	1B_IWB18787	674960353	121.4	145.804		34929	1A	1A_IWB34929	575215821	200.43	134.248
8187	1B	1B_IWB8187	565990601	59.9	82.8854		9613	1B	1B_IWB9613	675315784	121.4	145.804		29697	1A	1A_IWB29697	575228835	200.43	134.248
77159	1B	1B_IWA2588	570293194	61.63	84.4331		8817	1B	1B_IWB8817	675320327	121.4	158.591		54198	1A	1A_IWB54198	575363755	200.43	134.248
80857	1B	1B_IWA7527	570295641	61.63	84.4331		73713	1B	1B_IWB73713	675559614	123.23	154.844		78937	1A	1A_IWA4898	577840967	205.65	137.205
78302	1B	1B_IWA4091	570841370	61.63	84.4331		13057	1B	1B_IWB13057	678259617	125.2	158.591		80110	1A	1A_IWA6530	578563413	206.38	137.205
11437	1B	1B_IWB11437	571060426	61.63	84.4331		72247	1B	1B_IWB72247	678262860	125.2	162.136		53222	1A	1A_IWB53222	579830514	207.15	139.744
64027	1B	1B_IWB64027	572288338	62.54	85.5691		74944	1B	1B_IWB74944	678266671	125.2	153.945		6426	1A	1A_IWB6426	579830592	207.15	139.744
77301	1B	1B_IWA2789	568568831	63.39	84.4331		70716	1B	1B_IWB70716	678318098	125.2	164.893		78249	1A	1A_IWA4022	579864365	207.15	145.759
3990	1B	1B_IWB3990	568968795	63.39	84.4331		65272	1B	1B_IWB65272	679395962	125.2	164.635		11395	1A	1A_IWB11395	580422490	207.15	139.744
48890	1B	1B_IWB48890	570276826	63.39			9077	1B	1B_IWB9077	679653753	125.2	160.244		12340	1A	1A_IWB12340	581828997	207.15	140.929
48254	1B	1B_IWB48254	570842695	63.39	85.3553		43736	1B	1B_IWB43736	32531430	125.8	162.136		38852	1A	1A_IWB38852	581830214	207.15	170.797
40953	1B	1B_IWB40953	571060292	63.39	85.3553		71657	1B	1B_IWB71657	679653020	125.8	160.244		58979	1A	1A_IWB58979	577841655	207.79	137.12
40955	1B	1B_IWB40955	571060544	63.39	85.3553		6721	1B	1B_IWB6721	679710391	125.8	160.244		77747	1A	1A_IWA3377	579299322	207.79	137.12
40167	1B	1B_IWB40167	571439522	63.39	84.4331		35151	1B	1B_IWB35151	680162619	125.8	158.591		52856	1A	1A_IWB52856	582864991	211.1	165.012
27264	1B	1B_IWB27264	572674875	63.39	84.4331		31957	1B	1B_IWB31957	681690519	125.8	159.022		72943	1A	1A_IWB72943	582867330	211.1	163.855
51921	1B	1B_IWB51921	572913310	63.39	85.5691		434	1B	1B_IWB434	584674520	126.28	157.78		45411	1A	1A_IWB45411	583291151	211.1	142.309
48875	1B	1B_IWB48875	568522753	64.11	84.4331		52979	1B	1B_IWB52979	682469918	127.22	171.314		34474	1A	1A_IWB34474	583660923	211.1	142.62
60784	1B	1B_IWB60784	583088060	64.7	95.2006		56213	1B	1B_IWB56213	682470362	127.22	164.635		44568	1A	1A_IWB44568	583925902	212.27	164.726
38693	1B	1B_IWB38693	584156314	64.7	89.3218		56212	1B	1B_IWB56212	682471767	127.22	164.635		8006	1A	1A_IWB8006	587360579	215.55	149.819
40197	1B	1B_IWB40197	592023466	67.37	90.5951		31066	1B	1B_IWB31066	685740824	130.86	171.425		45182	1A	1A_IWB45182	592185947	216.67	151.254
75739	1B	1B_IWA579	595175966	67.95	92.3885		48380	1B	1B_IWB48380	685741380	130.86	173.624		3413	1A	1A_IWB3413	589023953	217.15	154.061
25615	1B	1B_IWB25615	595179212	67.95	92.3885		49490	1B	1B_IWB49490	685779966	130.86	172.673		80677	1A	1A_IWA7289	589028327	217.72	161.355
29957	1B	1B_IWB29957	594134935	68.58			75712	1B	1B_IWA545	686843295	130.86	173.624		34353	1A	1A_IWB34353	589874499	218.38	152.682
39058	1B	1B_IWB39058	588627558	69.16	90.2568		59942	1B	1B_IWB59942	688282801	134.23			76422	1A	1A_IWA1644	590001461	218.38	154.554
77753	1B	1B_IWA3384	588627965	69.71	90.2568		9054	1D	1D_IWB9054	513124	0	9.67858		80396	1A	1A_IWA6916	590001977	218.38	153.197
21176	1B	1B_IWB21176	588629220	69.71	90.2568		7273	1D	1D_IWB7273	2077082	0.48	8.36066		22117	1A	1A_IWB22117	590002741	218.38	139.744
751	1B	1B_IWB751	589061492	69.71	90.2568		44563	1D	1D_IWB44563	2219538	0.48	3.50177		45352	1A	1A_IWB45352	590343150	218.38	152.682
1073	1B	1B_IWB1073	589071333	70.38	90.2568		11805	1D	1D_IWB11805	2219939	0.48			9978	1A	1A_IWB9978	156063435	219.42	151.96
3067	1B	1B_IWB3067	589919596	70.38	90.5951		55046	1D	1D_IWB55046	417199	2.32	3.40225		56272	1A	1A_IWB56272	591090300	219.51	155.8
81458	1B	1B_IWA8398	622478685	76.51	96.1635		77543	1D	1D_IWA3124	417685	2.85	0		57932	1A	1A_IWB57932	591095673	219.51	155.8
64093	1B	1B_IWB64093	622571889	77.1	97.7144		63002	1D	1D_IWB63002	7555941	4.58	9.67858		10491	1A	1A_IWB10491	586914403	220.95	149.819
60038	1B	1B_IWB60038	626707542	81	101.059		24983	1D	1D_IWB24983	7556153	4.58	21.0452		78213	1A	1A_IWA3977	592313196	220.96	155.8
25341	1B	1B_IWB25341	628006165	81	103.57		45439	1D	1D_IWB45439	7039325	18.54	21.8005		36466	1B	1B_IWB36466	5159773	0	9.67858
72324	1B	1B_IWB72324	628006420	81	101.059		59230	1D	1D_IWB59230	7039601	18.54	21.8005		11851	1B	1B_IWB11851	99712980	2.5	64.46
72607	1B	1B_IWB72607	629159139	81	104.256		29450	1D	1D_IWB29450	7208448	20.19	31.0397		9362	1B	1B_IWB9362	37114004	5.79	176.3
62270	1B	1B_IWB62270	630063174	81	107.396		47223	1D	1D_IWB47223	7351669	22.63			46756	1B	1B_IWB46756	70327929	7.92	59.4724
1415	1B	1B_IWB1415	630832119	81	108.414		17979	1D	1D_IWB17979	8721371	24.3	10.3328		76973	1B	1B_IWA2345	94977942	7.92	62.5805
79597	1B	1B_IWA5749	630832212	81	108.363		76921	1D	1D_IWA2269	8464605	24.79	28.2132		80897	1B	1B_IWA7578	119622027	7.92	60.6243
37326	1B	1B_IWB37326	632003882	81	108.363		22921	1D	1D_IWB22921	7211528	25.86			41878	1B	1B_IWB41878	94977286	8.4	62.5805
46187	1B	1B_IWB46187	633299887	81	108.363		28957	1D	1D_IWB28957	8625463	26.37	23.2435		35285	1B	1B_IWB35285	120398623	8.88	62.5805
58214	1B	1B_IWB58214	633333021	81	108.5		77129	1D	1D_IWA2547	8727512	26.89			78304	1B	1B_IWA4093	112203159	9.38	62.839
20313	1B	1B_IWB20313	642770705	87.23	115.186		47907	1D	1D_IWB47907	9875153	27.93	28.1323		12440	1B	1B_IWB12440	111368162	9.94
12979	1B	1B_IWB12979	643591002	88.68	119.474		75909	1D	1D_IWA817	9875275	27.93	28.2132		7076	1B	1B_IWB7076	8559748	12.61	30.3377
8004	1B	1B_IWB8004	652576198	98.52	122.385		80087	1D	1D_IWA6500	10180260	29.32	29.1835		62999	1B	1B_IWB62999	280163250	13.56
27057	1B	1B_IWB27057	652453983	99.66	122.519		576	1D	1D_IWB576	10257281	29.32	29.1835		38627	1B	1B_IWB38627	9548231	13.84	24.5459
73738	1B	1B_IWB73738	654027223	100.27	122.764		2650	1D	1D_IWB2650	10383022	30.25			45439	1B	1B_IWB45439	9672889	13.84	21.8005
79663	1B	1B_IWA5847	654027297	100.27	125.068		65070	1D	1D_IWB65070	10434175	32.27	32.9838		5922	1B	1B_IWB5922	9711366	13.84	27.6412
3140	1B	1B_IWB3140	564279288	101.01	125.263		10914	1D	1D_IWB10914	11659226	35.45	141.352		48324	1B	1B_IWB48324	9711621	13.84	27.6157
631	1B	1B_IWB631	653888017	101.01	125.263		14612	1D	1D_IWB14612	11879726	35.94	45.4359		31876	1B	1B_IWB31876	234251759	14.69
76051	1B	1B_IWA1092	657177219	104.72	128.738		13406	1D	1D_IWB13406	15322246	38.76	41.7475		31877	1B	1B_IWB31877	234251783	14.69	70.1018
10787	1B	1B_IWB10787	658482895	104.72			1071	1D	1D_IWB1071	18066825	40.63	38.1113		12443	1B	1B_IWB12443	234251835	14.69	63.8569
10582	1B	1B_IWB10582	658738539	105.62	130.899		21928	1D	1D_IWB21928	227130166	64.76	77.891		36558	1B	1B_IWB36558	269648202	14.69
26010	1B	1B_IWB26010	660433162	107.22			65746	1D	1D_IWB65746	306673149	68.27			10492	1B	1B_IWB10492	10102105	15.11	41.2129
3351	1B	1B_IWB3351	662556340	108.65	113.813		61426	1D	1D_IWB61426	325964513	69.22	99.7786		71754	1B	1B_IWB71754	10103946	15.11	41.2129
73284	1B	1B_IWB73284	662909836	109.75	135.963		25365	1D	1D_IWB25365	337899075	72.01			6008	1B	1B_IWB6008	11634673	15.11	41.2129
35131	1B	1B_IWB35131	674079891	125.65	154.844		35246	1D	1D_IWB35246	343890012	72.5	80.7086		53314	1B	1B_IWB53314	11696983	15.11	31.0397
435	1B	1B_IWB435	678257416	130.96	164.726		15740	1D	1D_IWB15740	365846043	75.44	82.0458		12208	1B	1B_IWB12208	10359531	15.72	41.4714
53048	1B	1B_IWB53048	678858388	130.96	74.3716		9807	1D	1D_IWB9807	232494180	76.95	84.2165		12602	1B	1B_IWB12602	10361195	15.72	41.2129
78633	1B	1B_IWA4525	681253335	130.96			75573	1D	1D_IWA342	392140588	78.46	82.8171		7884	1B	1B_IWB7884	11181523	15.72	41.2129
31957	1B	1B_IWB31957	681690519	130.96	159.022		65822	1D	1D_IWB65822	407875162	86.47	87.3576		38368	1B	1B_IWB38368	11859756	15.72	41.2129
35036	1B	1B_IWB35036	688710381	132.17	171.314		65846	1D	1D_IWB65846	411560421	86.94	88.8503		6139	1B	1B_IWB6139	290127040	15.75
78964	1B	1B_IWA4935	688768048	132.17	146.254		65030	1D	1D_IWB65030	412217989	87.44	90.2995		56965	1B	1B_IWB56965	326918373	15.75	64.0994
38247	1B	1B_IWB38247	688769254	132.17	146.254		7763	1D	1D_IWB7763	408238972	87.94	78.4498		55154	1B	1B_IWB55154	327233912	15.75	64.8908
57241	1B	1B_IWB57241	687715386	132.9	164.726		79205	1D	1D_IWA5235	415413680	88.41	92.9056		61739	1B	1B_IWB61739	328824385	17.43
7641	1B	1B_IWB7641	687720416	132.9	173.624		60890	1D	1D_IWB60890	416101167	88.41	92.9056		11603	1B	1B_IWB11603	11621389	17.46	141.352
24349	1B	1B_IWB24349	687802310	132.9	173.624		27183	1D	1D_IWB27183	416458439	88.87	92.9056		73945	1B	1B_IWB73945	17810037	22.38	45.4284
80682	1D	1D_IWA7298	2091311	0	38.4909		23980	1D	1D_IWB23980	423251912	92.57	65.8929		48067	1B	1B_IWB48067	17810101	22.38	39.5536
34473	1D	1D_IWB34473	2111062	0	4.57158		77881	1D	1D_IWA3549	436191063	97.63	115.62		72107	1B	1B_IWB72107	20588217	22.38	43.8584
19471	1D	1D_IWB19471	2147421	0	3.50177		5670	1D	1D_IWB5670	467034395	132.43			11671	1B	1B_IWB11671	20589360	22.38
76921	1D	1D_IWA2269	8464605	7.63	28.2132		73445	1D	1D_IWB73445	467033488	132.98	113.813		80710	1B	1B_IWA7331	20594497	22.38	43.8584
78833	1D	1D_IWA4764	8623759	7.63	23.2435		38852	1D	1D_IWB38852	484416985	147.3	170.797		75093	1B	1B_IWB75093	24932284	24.75	60.6243
80430	1D	1D_IWA6960	8184870	8.27	21.8005		7254	1D	1D_IWB7254	486068110	147.3	164.726		72786	1B	1B_IWB72786	28561000	25.53	53.371
76227	1D	1D_IWA1397	8185547	8.93	21.8005		69582	1D	1D_IWB69582	491795998	147.3	164.726		31417	1B	1B_IWB31417	28764697	26.16	53.3487
47908	1D	1D_IWB47908	9874911	10.3	40.6354		68908	1D	1D_IWB68908	492507446	147.93	158.264		7923	1B	1B_IWB7923	38910632	28.76	56.6482
75909	1D	1D_IWA817	9875275	10.3	28.2132		68054	1D	1D_IWB68054	489541205	148.6	161.94		48577	1B	1B_IWB48577	40199660	28.76	56.8812
38400	1D	1D_IWB38400	10180482	11.66	29.1835		6493	1D	1D_IWB6493	491051266	149.19	164.726		31874	1B	1B_IWB31874	40942876	28.76	56.8812
49196	1D	1D_IWB49196	15171657	11.66			27806	1D	1D_IWB27806	485508333	150.46	170.797		31638	1B	1B_IWB31638	390098427	29
78694	1D	1D_IWA4598	31422181	47.37	67.7153		48271	1D	1D_IWB48271	485560353	150.46	163.855		21709	1B	1B_IWB21709	42016061	29.45
79030	1D	1D_IWA5020	31424364	47.37	67.7153		17607	1D	1D_IWB17607	486066929	150.46	159.576		74006	1B	1B_IWB74006	42350904	29.45
74045	1D	1D_IWB74045	32536292	47.37	118.824		60432	1D	1D_IWB60432	486156898	150.46	164.079		63847	1B	1B_IWB63847	46883147	29.45	56.7344
75370	1D	1D_IWA57	32544614	47.37	67.7153		8044	1D	1D_IWB8044	486877128	150.46	164.353		69962	1B	1B_IWB69962	50183768	30.07	60.6243
20760	1D	1D_IWB20760	93102924	53.42	75.0361		37	1D	1D_IWB37	490926881	150.46	148.656		10754	1B	1B_IWB10754	51990806	30.66	56.8812
55502	1D	1D_IWB55502	189661227	54.01			61688	1D	1D_IWB61688	491043140	150.46	163.855		10806	1B	1B_IWB10806	51990850	30.66
77798	1D	1D_IWA3446	203318330	54.01	75.0361		15653	1D	1D_IWB15653	491049956	150.46	159.576		76371	1B	1B_IWA1578	52901757	30.66	60.6243
2192	1D	1D_IWB2192	204295576	55.1	75.0361		5990	1D	1D_IWB5990	491636374	150.46	163.855		76671	1B	1B_IWA1947	53052373	30.66
38561	1D	1D_IWB38561	268950190	57.88	78.3637		19016	1D	1D_IWB19016	493026628	150.46	179.542		73550	1B	1B_IWB73550	53248886	30.66	57.596
708	1D	1D_IWB708	290444008	57.88	78.3637		6300	1D	1D_IWB6300	494063317	150.46	163.855		80045	1B	1B_IWA6450	56313047	30.66	57.596
27449	1D	1D_IWB27449	308455892	60.88	81.1626		59764	1D	1D_IWB59764	488575235	150.46	164.079		78616	1B	1B_IWA4504	56314807	30.66
25365	1D	1D_IWB25365	337899075	64.88			71970	1D	1D_IWB71970	492646464	151.09			42781	1B	1B_IWB42781	56879637	30.66	60.6243
80582	1D	1D_IWA7154	351440063	68.87	81.9339		54334	2A	2A_IWB54334	255651	0	18.1862		28624	1B	1B_IWB28624	57003287	30.66	59.6995
34905	1D	1D_IWB34905	357459858	69.42	99.5671		77542	2A	2A_IWA3122	528186	1.56	4.84848		7023	1B	1B_IWB7023	57430608	32.04	57.596
17397	1D	1D_IWB17397	370629638	72.71	82.5994		31328	2A	2A_IWB31328	3333659	4.16	6.04118		47932	1B	1B_IWB47932	58754069	32.04	57.596
49445	1D	1D_IWB49445	433274834	89.83			5881	2A	2A_IWB5881	3962554	4.16	20.1382		49337	1B	1B_IWB49337	58754108	32.04	57.3088
22184	2A	2A_IWB22184	7545148	0	19.6002		27886	2A	2A_IWB27886	4330429	4.16	6.04118		80554	1B	1B_IWA7117	59592676	32.04	57.596
22183	2A	2A_IWB22183	7545377	0	19.6002		55769	2A	2A_IWB55769	6292860	4.16	16.8796		58093	1B	1B_IWB58093	71623729	32.04	60.6243
41233	2A	2A_IWB41233	21252855	26.11	47.2174		21872	2A	2A_IWB21872	6986156	4.16	16.8796		45038	1B	1B_IWB45038	59196975	32.62	57.3088
23669	2A	2A_IWB23669	21534263	26.11			42600	2A	2A_IWB42600	4213821	4.64	18.5719		77150	1B	1B_IWA2577	59593301	33.2	57.596
57168	2A	2A_IWB57168	24029515	26.11	47.2174		25454	2A	2A_IWB25454	515898475	4.64	20.1382		24627	1B	1B_IWB24627	540279885	35.7	70.0795
62185	2A	2A_IWB62185	24029872	26.11			20060	2A	2A_IWB20060	2640560	5.18	6.04118		31762	1B	1B_IWB31762	54461810	36.3
11847	2A	2A_IWB11847	24278890	26.11	12.3146		27885	2A	2A_IWB27885	2797924	5.69	4.84848		28554	1B	1B_IWB28554	482164712	36.8	70.0795
43984	2A	2A_IWB43984	29285455	29.48	52.7385		54879	2A	2A_IWB54879	3101204	5.69			32564	1B	1B_IWB32564	98168686	38.23
79605	2A	2A_IWA5762	29877256	29.48	53.1809		20059	2A	2A_IWB20059	2647502	6.25	6.04118		60913	1B	1B_IWB60913	487406389	38.59	72.1538
4956	2A	2A_IWB4956	30072653	29.48	61.2816		77034	2A	2A_IWA2425	2646023	6.76	6.04118		23428	1B	1B_IWB23428	114343934	38.81	63.7325
1280	2A	2A_IWB1280	30866076	30.83	64.9852		66102	2A	2A_IWB66102	2646023	6.76	6.04118		7193	1B	1B_IWB7193	115951864	39.37	62.6379
5988	2A	2A_IWB5988	31693325	32.18	66.0643		80266	2A	2A_IWA6745	3447494	6.76	17.3493		67341	1B	1B_IWB67341	113815138	40.56	59.9351
72185	2A	2A_IWB72185	40650914	37.72			490	2A	2A_IWB490	3962431	6.76	18.5719		40637	1B	1B_IWB40637	130007853	41.19	43.8584
67517	2A	2A_IWB67517	40816264	37.72	79.3334		26302	2A	2A_IWB26302	43446860	11.63			38539	1B	1B_IWB38539	136650758	41.19	62.9507
71517	2A	2A_IWB71517	40819957	37.72			65489	2A	2A_IWB65489	8369244	13.21	48.443		39791	1B	1B_IWB39791	137154068	42.41	62.6379
40186	2A	2A_IWB40186	42392191	39.32	77.9105		44423	2A	2A_IWB44423	43445962	14.77			81153	1B	1B_IWA7934	151463896	43.7	64.46
41737	2A	2A_IWB41737	44094979	42.23	82.768		59316	2A	2A_IWB59316	10587192	15.72	21.1875		55419	1B	1B_IWB55419	228560592	43.82	77.3935
71719	2A	2A_IWB71719	44836509	42.23	81.4886		100	2A	2A_IWB100	10993028	15.72	25.9702		10066	1B	1B_IWB10066	543517602	43.82	75.1023
50806	2A	2A_IWB50806	46107321	42.88	81.4886		49592	2A	2A_IWB49592	11746006	15.72			74237	1B	1B_IWB74237	505283378	44.38
35347	2A	2A_IWB35347	46108342	42.88	81.4886		66734	2A	2A_IWB66734	19443359	19.12	30.0056		72311	1B	1B_IWB72311	290125941	44.87	70.1018
76979	2A	2A_IWA2352	49451032	44.87	104.865		66733	2A	2A_IWB66733	13133663	19.71	30.0056		70284	1B	1B_IWB70284	297728896	44.87	64.0994
6858	2A	2A_IWB6858	49851341	44.87	82.768		30196	2A	2A_IWB30196	16077453	25.45	39.3439		72755	1B	1B_IWB72755	308588150	44.87	64.0994
78885	2A	2A_IWA4830	50916491	44.87			21598	2A	2A_IWB21598	671426559	34.48	25.9702		20988	1B	1B_IWB20988	322937664	44.87
78253	2A	2A_IWA4027	83927708	60.77	101.974		39924	2A	2A_IWB39924	620708650	44.62	15.3555		38766	1B	1B_IWB38766	325289356	44.87
77116	2A	2A_IWA2531	84940673	61.47	101.974		49123	2A	2A_IWB49123	736456106	44.62	25.9702		78532	1B	1B_IWA4389	326783444	44.87	64.8908
21265	2A	2A_IWB21265	85599635	61.47	101.974		41233	2A	2A_IWB41233	21252855	45.12	47.2174		55418	1B	1B_IWB55418	638308782	44.94	75.1023
5321	2A	2A_IWB5321	104971952	63.23	101.974		6727	2A	2A_IWB6727	21261871	45.12	47.2174		69319	1B	1B_IWB69319	572342634	45.48	78.4498
65777	2A	2A_IWB65777	111421060	63.23	103.621		12622	2A	2A_IWB12622	21261912	45.12	47.2174		48664	1B	1B_IWB48664	329488001	45.65	64.8908
76840	2A	2A_IWA2159	115435015	63.23	101.974		25031	2A	2A_IWB25031	24060026	45.63	47.2174		78993	1B	1B_IWA4975	331423186	45.65	64.8908
79321	2A	2A_IWA5378	176892097	64.9	103.97		9340	2A	2A_IWB9340	27601984	53.26	61.1413		42085	1B	1B_IWB42085	548968557	46.02	78.4498
26940	2A	2A_IWB26940	278920008	67.34	104.132		59049	2A	2A_IWB59049	27810618	53.26	62.5102		12813	1B	1B_IWB12813	549794625	46.02	78.4498
77678	2A	2A_IWA3294	501323016	67.99	104.132		76666	2A	2A_IWA1942	118994901	53.26	110.863		10372	1B	1B_IWB10372	551221687	46.02
65453	2A	2A_IWB65453	503004751	67.99	103.97		59050	2A	2A_IWB59050	27854945	53.87			7205	1B	1B_IWB7205	334549974	46.91	66.0715
41389	2A	2A_IWB41389	504076105	68.6	101.974		32285	2A	2A_IWB32285	27811161	54.44	62.5102		63332	1B	1B_IWB63332	336648484	46.91
14845	2A	2A_IWB14845	504711045	68.6			43984	2A	2A_IWB43984	29285455	54.91	52.7385		35618	1B	1B_IWB35618	342648038	46.91	65.3567
39681	2A	2A_IWB39681	498043625	69.31	104.132		5525	2A	2A_IWB5525	29871835	55.43	53.1809		7211	1B	1B_IWB7211	344044080	46.91
80785	2A	2A_IWA7429	500533946	69.31	104.132		5428	2A	2A_IWB5428	29872214	55.99	51.767		69305	1B	1B_IWB69305	347021397	46.91	69.9252
77311	2A	2A_IWA2807	585662292	72.28	108.61		79605	2A	2A_IWA5762	29877256	55.99	53.1809		78783	1B	1B_IWA4706	348797994	46.91	66.0715
6986	2A	2A_IWB6986	663328967	82.49	110.992		81511	2A	2A_IWA8498	116000074	55.99	64.9045		20542	1B	1B_IWB20542	367439573	46.91	65.4206
11810	2A	2A_IWB11810	685223728	90.42			79604	2A	2A_IWA5760	29877339	57.02	53.1809		37118	1B	1B_IWB37118	402143932	46.91	66.9044
32430	2A	2A_IWB32430	690932190	91.59	115.135		76079	2A	2A_IWA1166	30071860	58.48	53.1809		40125	1B	1B_IWB40125	548623862	47.51	78.4498
32429	2A	2A_IWB32429	690932208	91.59			17580	2A	2A_IWB17580	27824549	58.95	53.1809		71352	1B	1B_IWB71352	548623862	47.51	78.4498
28453	2A	2A_IWB28453	691218466	91.59	115.135		76112	2A	2A_IWA1242	30047950	58.95	53.1809		20717	1B	1B_IWB20717	365692953	47.53
47525	2A	2A_IWB47525	691224866	91.59	116.193		13159	2A	2A_IWB13159	30047950	58.95	53.1809		6815	1B	1B_IWB6815	406042964	48.18	67.1406
55262	2A	2A_IWB55262	691478680	91.59	115.135		38844	2A	2A_IWB38844	34499208	67.57	68.9698		11881	1B	1B_IWB11881	409630041	48.18	67.1406
22730	2A	2A_IWB22730	692633239	91.59	116.193		17732	2A	2A_IWB17732	33855549	69.06	73.3909		12002	1B	1B_IWB12002	407544322	48.76	67.1406
2961	2A	2A_IWB2961	692850266	91.59			72185	2A	2A_IWB72185	40650914	72.85			8804	1B	1B_IWB8804	412895506	50.11	67.3767
64616	2A	2A_IWB64616	713542491	93.12	119.933		71517	2A	2A_IWB71517	40819957	73.96			35871	1B	1B_IWB35871	419203671	50.11	67.3767
26200	2A	2A_IWB26200	713444679	93.91	119.933		67517	2A	2A_IWB67517	40816264	74.47	79.3334		67865	1B	1B_IWB67865	573571920	51	86.0733
51031	2A	2A_IWB51031	713445656	93.91	119.747		7033	2A	2A_IWB7033	40823104	74.47	79.3334		70039	1B	1B_IWB70039	566838457	51.52	84.4331
11764	2A	2A_IWB11764	715413537	95.11	123.645		8574	2A	2A_IWB8574	43299300	78.72	77.9105		70038	1B	1B_IWB70038	566838725	51.52	84.4331
57860	2A	2A_IWB57860	716169593	95.77	124.931		41737	2A	2A_IWB41737	44094979	80.16	82.768		29347	1B	1B_IWB29347	566840473	51.52	84.4331
78522	2A	2A_IWA4375	716456217	96.51	122.826		71719	2A	2A_IWB71719	44836509	80.16	81.4886		10997	1B	1B_IWB10997	430168568	51.83	68.7521
11942	2A	2A_IWB11942	702714575	97.16	114.568		9401	2A	2A_IWB9401	162563755	80.16	82.768		74145	1B	1B_IWB74145	445180564	52.4	70.0795
75984	2A	2A_IWA970	718223829	97.16			77666	2A	2A_IWA3280	162564077	80.16	79.2886		73167	1B	1B_IWB73167	447323307	52.4	70.0795
11143	2A	2A_IWB11143	718355438	97.16			78529	2A	2A_IWA4385	49176723	83.02	82.768		9703	1B	1B_IWB9703	448141350	52.4	70.0795
11194	2A	2A_IWB11194	718730537	97.16	76.3936		72863	2A	2A_IWB72863	49222399	83.02	82.768		77218	1B	1B_IWA2667	451076976	52.4	70.7816
75001	2A	2A_IWB75001	719528069	97.92	127.382		72864	2A	2A_IWB72864	49222428	83.02	82.768		39738	1B	1B_IWB39738	452316860	52.4	70.6444
79032	2A	2A_IWA5024	721113550	105.61	115.797		48575	2A	2A_IWB48575	49452945	83.51	82.768		77588	1B	1B_IWA3189	581693720	52.54	87.2955
32038	2A	2A_IWB32038	728408867	105.61			9740	2A	2A_IWB9740	49848688	83.51	82.768		51889	1B	1B_IWB51889	453878508	53.02	70.0795
8706	2A	2A_IWB8706	729287911	105.61	132.741		79929	2A	2A_IWA6250	51583980	84.94	88.5371		5511	1B	1B_IWB5511	471193698	53.72	76.0916
8707	2A	2A_IWB8707	729288308	105.61	132.741		51951	2A	2A_IWB51951	58670792	93.11	92.8177		78387	1B	1B_IWA4197	474451205	53.72	70.0795
7563	2A	2A_IWB7563	733091174	107.94	132.422		63547	2A	2A_IWB63547	62299513	96.46	92.2916		65832	1B	1B_IWB65832	478055163	53.72	70.0795
13993	2A	2A_IWB13993	731000215	110.62	76.5687		10490	2A	2A_IWB10490	62302232	96.46	92.2916		44100	1B	1B_IWB44100	488206341	54.42	75.1023
28806	2A	2A_IWB28806	734524537	110.62			36470	2A	2A_IWB36470	70984364	102.98	96.6319		74758	1B	1B_IWB74758	488455259	54.42	75.2746
28215	2A	2A_IWB28215_1	734623121	110.62	82.8209		79691	2A	2A_IWA5893	71589600	102.98	97.5107		51263	1B	1B_IWB51263	488469381	54.42	69.191
28215	2A	2A_IWB28215_2	734623121	110.62	82.8209		77593	2A	2A_IWA3194	71623643	103.93	99.2803		38741	1B	1B_IWB38741	490452820	54.42	75.1023
81225	2A	2A_IWA8040	740366234	114.25	142.355		72481	2A	2A_IWB72481	72381588	103.93	97.5107		74185	1B	1B_IWB74185	491087439	54.42	74.9396
23839	2A	2A_IWB23839	741371290	114.25			64536	2A	2A_IWB64536	107382809	111.37	101.974		7183	1B	1B_IWB7183	494159127	54.95	75.1023
4189	2A	2A_IWB4189	741371713	114.25			67490	2A	2A_IWB67490	298582962	121.35	101.974		62507	1B	1B_IWB62507	497781369	54.95	75.1023
4530	2A	2A_IWB4530	740361149	114.87	82.8209		45113	2A	2A_IWB45113	309690387	121.35	104.132		79833	1B	1B_IWA6107	509892647	54.95	74.1865
81226	2A	2A_IWA8041	740363475	114.87	142.355		39087	2A	2A_IWB39087	337855824	121.92	101.974		80981	1B	1B_IWA7700	511449170	54.95	74.3716
2430	2A	2A_IWB2430	746682372	114.87	143.488		44788	2A	2A_IWB44788	459507067	123.56	104.132		4238	1B	1B_IWB4238	512635708	54.95	74.3716
5740	2A	2A_IWB5740	746763800	114.87	143.649		24815	2A	2A_IWB24815	416831785	124.06			68593	1B	1B_IWB68593	533963829	56.29	195.099
7090	2A	2A_IWB7090	750066046	115.48			47696	2A	2A_IWB47696	468305478	124.06			26192	1B	1B_IWB26192	540730073	57.05	77.6137
9249	2A	2A_IWB9249	752559649	116.73			52745	2A	2A_IWB52745	468305618	124.06	99.5593		23636	1B	1B_IWB23636	540847921	57.05	77.6137
73086	2A	2A_IWB73086	752749824	116.73	134.46		39681	2A	2A_IWB39681	498043625	124.06	104.132		32500	1B	1B_IWB32500	544997592	58.16	78.4498
8654	2A	2A_IWB8654	752796874	116.73			57685	2A	2A_IWB57685	498105407	124.06	104.132		6377	1B	1B_IWB6377	545074573	58.16
30763	2A	2A_IWB30763	753980276	119.59	148.787		28385	2A	2A_IWB28385	502334613	124.06	101.974		34737	1B	1B_IWB34737	545207215	58.16	78.4498
12358	2A	2A_IWB12358	754349286	119.59	148.787		74519	2A	2A_IWB74519	502622814	124.06	104.096		39290	1B	1B_IWB39290	545208141	58.16	78.4498
11978	2A	2A_IWB11978	755789414	120.18	149.648		69588	2A	2A_IWB69588	502626466	124.06			49515	1B	1B_IWB49515	545800733	58.16	78.4498
72339	2A	2A_IWB72339	755930956	120.18	156.691		28	2A	2A_IWB28	502626583	124.06			10226	1B	1B_IWB10226	546273043	58.16	78.4498
74103	2A	2A_IWB74103	759306881	120.84	150.288		34874	2A	2A_IWB34874	504711294	124.57	104.132		73745	1B	1B_IWB73745	547584013	58.16	78.4498
77917	2A	2A_IWA3596	759830602	120.84	151.292		77409	2A	2A_IWA2948	505086981	124.57	103.621		72079	1B	1B_IWB72079	547968251	58.16	78.4498
76190	2A	2A_IWA1348	760565827	120.84	151.292		77561	2A	2A_IWA3151	558526626	127.15	108.463		10373	1B	1B_IWB10373	551221639	58.16	126.53
71057	2A	2A_IWB71057	760567102	120.84	151.292		61279	2A	2A_IWB61279	562604276	127.72	108.463		78878	1B	1B_IWA4819	553017501	58.16	81.609
72299	2A	2A_IWB72299	758420918	121.44	150.288		75354	2A	2A_IWA32	564503087	127.72	105.534		10143	1B	1B_IWB10143	554137239	58.16	81.609
46343	2A	2A_IWB46343	776552712	121.44	162.894		77778	2A	2A_IWA3417	604750643	132.95			43583	1B	1B_IWB43583	557397068	58.16	79.7741
4380	2A	2A_IWB4380	778722860	121.44	162.894		36324	2A	2A_IWB36324	607909124	132.95			36357	1B	1B_IWB36357	561705199	59.32	80.5814
80336	2A	2A_IWA6839	779670506	121.44	150.288		6531	2A	2A_IWB6531	608608502	135.4			77987	1B	1B_IWA3684	562375102	59.32	81.609
11535	2A	2A_IWB11535	779673663	121.44	151.298		71648	2A	2A_IWB71648	636209104	155.76	107.389		6730	1B	1B_IWB6730	562893037	59.32	81.609
72114	2A	2A_IWB72114	779818505	121.44	151.298		32066	2A	2A_IWB32066	678187821	155.76			77253	1B	1B_IWA2717	563027814	59.32	81.609
6580	2A	2A_IWB6580	770012827	122.13	177.436		22575	2A	2A_IWB22575	681195568	157.42			5796	1B	1B_IWB5796	563028672	59.32	81.609
32486	2B	2B_IWB32486	6337735	0	19.156		11810	2A	2A_IWB11810	685223728	157.96			27998	1B	1B_IWB27998	563030530	59.32	81.609
80930	2B	2B_IWA7633	6338184	0	19.156		49283	2A	2A_IWB49283	686857836	158.93			8999	1B	1B_IWB8999	563307053	59.32	81.609
58123	2B	2B_IWB58123	7429616	0	16.8796		50018	2A	2A_IWB50018	686860528	158.93			36872	1B	1B_IWB36872	563675946	59.32	81.609
10890	2B	2B_IWB10890	8342919	0	16.8796		32429	2A	2A_IWB32429	690932208	160.38			8187	1B	1B_IWB8187	565990601	59.9	82.8854
9673	2B	2B_IWB9673	8344459	0	16.8796		25469	2A	2A_IWB25469	690934886	160.38			54518	1B	1B_IWB54518	598381224	60.02	130.086
8365	2B	2B_IWB8365	2109722	0.57			76784	2A	2A_IWA2092	692634022	160.38	116.193		54519	1B	1B_IWB54519	598381336	60.67
47276	2B	2B_IWB47276	2109888	0.57			46979	2A	2A_IWB46979	692636998	160.38	116.193		13742	1B	1B_IWB13742	598381569	60.67	95.487
62175	2B	2B_IWB62175	4988010	0.57	20.1601		77194	2A	2A_IWA2640	703875578	166.04	116.193		63852	1B	1B_IWB63852	600891127	61.23	95.4168
23764	2B	2B_IWB23764	16857226	4.62	26.1068		39108	2A	2A_IWB39108	703878259	166.04			77159	1B	1B_IWA2588	570293194	61.63	84.4331
26388	2B	2B_IWB26388	17564545	6.56	27.1982		11764	2A	2A_IWB11764	715413537	172.14	123.645		80857	1B	1B_IWA7527	570295641	61.63	84.4331
46573	2B	2B_IWB46573	17570892	6.56	27.1982		57860	2A	2A_IWB57860	716169593	173.08	124.931		78302	1B	1B_IWA4091	570841370	61.63	84.4331
12617	2B	2B_IWB12617	17572453	6.56	27.1982		78521	2A	2A_IWA4374	716456284	173.56	124.808		11437	1B	1B_IWB11437	571060426	61.63	84.4331
60877	2B	2B_IWB60877	18176463	6.56	27.1982		81100	2A	2A_IWA7864	716457525	173.56	122.826		75930	1B	1B_IWA858	622219011	62.5	96.1635
22424	2B	2B_IWB22424	18939220	6.56	32.1626		52895	2A	2A_IWB52895	716834890	173.56	123.645		64027	1B	1B_IWB64027	572288338	62.54	85.5691
10944	2B	2B_IWB10944	20373384	8.45			45747	2A	2A_IWB45747	717189499	174.63	114.094		60066	1B	1B_IWB60066	608995839	63.11
81154	2B	2B_IWA7936	24861140	19.06	41.3586		75984	2A	2A_IWA970	718223829	174.63			77301	1B	1B_IWA2789	568568831	63.39	84.4331
26149	2B	2B_IWB26149	28368570	28.67	48.5401		12522	2A	2A_IWB12522	718838946	175.12	125.331		3990	1B	1B_IWB3990	568968795	63.39	84.4331
63153	2B	2B_IWB63153	44426840	42.76	66.5049		54273	2A	2A_IWB54273	721562498	177.06	127.654		48890	1B	1B_IWB48890	570276826	63.39
78103	2B	2B_IWA3838	42150287	43.38	65.2669		973	2A	2A_IWB973	719470677	177.53	125.331		48254	1B	1B_IWB48254	570842695	63.39	85.3553
76806	2B	2B_IWA2115	44424745	44.07	67.1036		75001	2A	2A_IWB75001	719528069	177.53	127.382		40953	1B	1B_IWB40953	571060292	63.39	85.3553
76653	2B	2B_IWA1929	41960988	44.78	65.2669		81109	2A	2A_IWA7876	723525853	182.95	128.894		40955	1B	1B_IWB40955	571060544	63.39	85.3553
23606	2B	2B_IWB23606	44922004	44.78	67.1036		61745	2A	2A_IWB61745	727580363	189.08	130.398		40167	1B	1B_IWB40167	571439522	63.39	84.4331
8280	2B	2B_IWB8280	47426939	44.78	69.7729		76680	2A	2A_IWA1960	728758530	189.55	131.97		27264	1B	1B_IWB27264	572674875	63.39	84.4331
34527	2B	2B_IWB34527	47427272	44.78	69.7729		81447	2A	2A_IWA8385	728758530	189.55	131.97		51921	1B	1B_IWB51921	572913310	63.39	85.5691
34673	2B	2B_IWB34673	52670346	45.56	71.9994		10182	2A	2A_IWB10182	722346909	190.02	132.741		48875	1B	1B_IWB48875	568522753	64.11	84.4331
44675	2B	2B_IWB44675	52700856	45.56	71.9994		8707	2A	2A_IWB8707	729288308	190.02	132.741		60784	1B	1B_IWB60784	583088060	64.7	95.2006
80066	2B	2B_IWA6474	52870346	45.56	71.9994		7094	2A	2A_IWB7094	732569001	195.28	132.741		38693	1B	1B_IWB38693	584156314	64.7	89.3218
76199	2B	2B_IWA1360	52874095	45.56	71.9994		41366	2A	2A_IWB41366	732569649	195.28	132.741		40197	1B	1B_IWB40197	592023466	67.37	90.5951
9200	2B	2B_IWB9200	54554215	46.12			11232	2A	2A_IWB11232	732569776	195.28	132.741		75739	1B	1B_IWA579	595175966	67.95	92.3885
72380	2B	2B_IWB72380	58325008	47.24	73.7488		76342	2A	2A_IWA1539	733922282	199.99	133.142		25615	1B	1B_IWB25615	595179212	67.95	92.3885
46469	2B	2B_IWB46469	58845575	47.24	74.8995		9526	2A	2A_IWB9526	734999495	200.93	135.351		29957	1B	1B_IWB29957	594134935	68.58
77147	2B	2B_IWA2571	58978466	47.79	74.8995		6121	2A	2A_IWB6121	735007905	200.93	135.569		39058	1B	1B_IWB39058	588627558	69.16	90.2568
77148	2B	2B_IWA2572	58978826	48.39	74.8995		62594	2A	2A_IWB62594	734352032	201.39	130.891		77753	1B	1B_IWA3384	588627965	69.71	90.2568
78402	2B	2B_IWA4216	63292314	50.63	78.0331		39215	2A	2A_IWB39215	734528771	202.79	132.741		21176	1B	1B_IWB21176	588629220	69.71	90.2568
56961	2B	2B_IWB56961	65375509	52.3	76.7019		54915	2A	2A_IWB54915	734972837	203.27	134.75		751	1B	1B_IWB751	589061492	69.71	90.2568
71719	2B	2B_IWB71719	68130687	53.07	81.4886		53046	2A	2A_IWB53046	734973568	203.27	134.75		1073	1B	1B_IWB1073	589071333	70.38	90.2568
39654	2B	2B_IWB39654	68363434	53.07	78.1145		72716	2A	2A_IWB72716	739712880	207.59	139.351		3067	1B	1B_IWB3067	589919596	70.38	90.5951
72086	2B	2B_IWB72086	69650680	54.44	79.1498		76750	2A	2A_IWA2051	739876805	207.59	141.655		81458	1B	1B_IWA8398	622478685	76.51	96.1635
78558	2B	2B_IWA4420	72578269	54.44	79.4928		10956	2A	2A_IWB10956	739923970	208.06	139.847		64093	1B	1B_IWB64093	622571889	77.1	97.7144
47654	2B	2B_IWB47654	72769859	54.44			10957	2A	2A_IWB10957	739924052	208.06	139.847		60038	1B	1B_IWB60038	626707542	81	101.059
43156	2B	2B_IWB43156	72814846	54.44	79.7485		36028	2A	2A_IWB36028	743096726	209.92	141.655		25341	1B	1B_IWB25341	628006165	81	103.57
21394	2B	2B_IWB21394	69344059	55.05	79.4928		43349	2A	2A_IWB43349	743573777	209.92	141.655		72324	1B	1B_IWB72324	628006420	81	101.059
59021	2B	2B_IWB59021	69346013	55.05	79.4928		34772	2A	2A_IWB34772	744447878	209.92	141.401		72607	1B	1B_IWB72607	629159139	81	104.256
80375	2B	2B_IWA6893	75608176	55.05	80.7744		78491	2A	2A_IWA4336	740847864	211.32	141.401		62270	1B	1B_IWB62270	630063174	81	107.396
23422	2B	2B_IWB23422	76817110	55.05	81.7505		26553	2A	2A_IWB26553	747179726	211.32	141.401		1415	1B	1B_IWB1415	630832119	81	108.414
74618	2B	2B_IWB74618	76929201	55.05	79.4928		29650	2A	2A_IWB29650	743538643	212.48	141.655		79597	1B	1B_IWA5749	630832212	81	108.363
73250	2B	2B_IWB73250	77290852	55.05	79.7485		49774	2A	2A_IWB49774	744812957	212.48	143.216		37326	1B	1B_IWB37326	632003882	81	108.363
31001	2B	2B_IWB31001	91836588	56.11	82.1247		8907	2A	2A_IWB8907	747090455	215.28	143.216		46187	1B	1B_IWB46187	633299887	81	108.363
57346	2B	2B_IWB57346	94223974	56.11	81.9531		5743	2A	2A_IWB5743	747251775	215.28			58214	1B	1B_IWB58214	633333021	81	108.5
44618	2B	2B_IWB44618	95761959	56.11	83.3938		66059	2A	2A_IWB66059	728782280	215.8			3934	1B	1B_IWB3934	637369236	82.53	109.697
69461	2B	2B_IWB69461	97394385	56.11			71251	2A	2A_IWB71251	586137914	217.95			41690	1B	1B_IWB41690	637596852	83.03	110.926
39862	2B	2B_IWB39862	102421549	58.34	83.7961		3746	2A	2A_IWB3746	751511217	220.43	148.787		74754	1B	1B_IWB74754	637621986	83.03	109.697
60422	2B	2B_IWB60422	98360670	58.93	83.7961		8635	2A	2A_IWB8635	750550273	220.94			34585	1B	1B_IWB34585	637944995	83.03	110.926
78338	2B	2B_IWA4135	102977549	58.93	84.6911		9249	2A	2A_IWB9249	752559649	221.99			3768	1B	1B_IWB3768	640853587	84.54	118.829
72913	2B	2B_IWB72913	104062890	58.93	84.6911		35952	2A	2A_IWB35952	753539728	223.42	143.216		77670	1B	1B_IWA3284	640853587	86.04	118.829
7331	2B	2B_IWB7331	17383933	66.74	92.2811		64018	2A	2A_IWB64018	753540797	223.42	148.787		1371	1B	1B_IWB1371	640508532	87.06	114.129
76524	2B	2B_IWA1763	150707767	67.32	92.5711		39371	2A	2A_IWB39371	757885277	228.47	151.292		79698	1B	1B_IWA5900	640853347	87.06	114.129
48834	2B	2B_IWB48834	96248744	67.93			10540	2A	2A_IWB10540	757918545	228.47	151.292		77524	1B	1B_IWA3097	640856172	87.06	113.842
47487	2B	2B_IWB47487	154251253	68.55	92.6647		55113	2A	2A_IWB55113	757947956	228.99	149.831		77523	1B	1B_IWA3096	640857501	87.06	114.085
79877	2B	2B_IWA6177	157695144	71.28			27309	2A	2A_IWB27309	757948238	228.99	149.831		20313	1B	1B_IWB20313	642770705	87.23	115.186
78933	2B	2B_IWA4894	158618930	72.38	93.4661		77917	2A	2A_IWA3596	759830602	230.86	151.292		12979	1B	1B_IWB12979	643591002	88.68	119.474
75364	2B	2B_IWA50	164089285	73.57	93.8403		55863	2A	2A_IWB55863	759830917	230.86	151.292		80573	1B	1B_IWA7141	643096819	89.86	115.881
9332	2B	2B_IWB9332	165117895	73.57	94.651		4353	2A	2A_IWB4353	758397416	231.34	151.292		65867	1B	1B_IWB65867	643097046	89.86	115.881
77663	2B	2B_IWA3277	166472440	73.57	95.8235		69132	2A	2A_IWB69132	758287054	231.83	151.298		24341	1B	1B_IWB24341	643102204	89.86	115.881
46352	2B	2B_IWB46352	168610742	73.57	96.9867		39958	2A	2A_IWB39958	758396715	231.83	151.292		46686	1B	1B_IWB46686	646167745	91.71	118.23
79812	2B	2B_IWA6075	176706026	73.57	96.9867		61340	2A	2A_IWB61340	758397716	232.81	150.267		5810	1B	1B_IWB5810	646172198	91.71	118.919
76047	2B	2B_IWA1087	180616436	74.31	96.1354		47815	2A	2A_IWB47815	777143444	240.48	163.458		75829	1B	1B_IWA696	646167658	92.18	118.287
77785	2B	2B_IWA3428	182013653	74.31	96.1354		54569	2A	2A_IWB54569	777358212	245.83	153.573		13876	1B	1B_IWB13876	646167658	92.18	118.287
80327	2B	2B_IWA6830	184493270	75.04	96.1354		72975	2A	2A_IWB72975	770486978	252.61	103.328		36030	1B	1B_IWB36030	651557802	96.35	121.306
8099	2B	2B_IWB8099	184661676	75.04	96.1354		54393	2A	2A_IWB54393	774814992	253.14	157.214		76572	1B	1B_IWA1825	652455270	96.35	122.519
76639	2B	2B_IWA1912	185762984	75.62	96.9867		12337	2A	2A_IWB12337	774855820	253.14	103.328		35065	1B	1B_IWB35065	652457867	96.35	122.519
26221	2B	2B_IWB26221	189745264	75.62	95.1469		54394	2A	2A_IWB54394	774814967	253.14	94.145		76033	1B	1B_IWA1069	653185853	96.35	122.519
52025	2B	2B_IWB52025	214562066	78.05	99.7308		79747	2A	2A_IWA5978	772965691	255.94	120.085		35891	1B	1B_IWB35891	653185853	96.35	122.519
49755	2B	2B_IWB49755	216459803	78.6	96.9867		36745	2A	2A_IWB36745	771513369	257.82	97.0048		15640	1B	1B_IWB15640	683108684	96.82	122.764
23294	2B	2B_IWB23294	227080990	79.18	96.9867		35077	2A	2A_IWB35077	770017488	258.73	177.651		8004	1B	1B_IWB8004	652576198	98.52	122.385
12642	2B	2B_IWB12642	237177078	79.18	98.5271		24240	2A	2A_IWB24240	771512388	259.72			8840	1B	1B_IWB8840	654241389	98.56	126.137
27246	2B	2B_IWB27246	239647325	79.18	97.6041		64954	2A	2A_IWB64954	771514533	259.72			27057	1B	1B_IWB27057	652453983	99.66	122.519
23529	2B	2B_IWB23529	242825134	79.18	99.157		11240	2A	2A_IWB11240	767792065	260.66	173.352		81298	1B	1B_IWA8139	655272117	99.71
63406	2B	2B_IWB63406	248149824	80.47	99.7308		56270	2A	2A_IWB56270	769496938	260.66	183.767		7459	1B	1B_IWB7459	655781639	99.71	117.812
34710	2B	2B_IWB34710	239381463	81.19	101.974		34494	2A	2A_IWB34494	765707710	263.95	183.767		73299	1B	1B_IWB73299	655781892	99.71
74681	2B	2B_IWB74681	240318304	81.19	99.157		77990	2A	2A_IWA3688	765710144	263.95	98.5949		41964	1B	1B_IWB41964	655278151	99.71	117.812
32166	2B	2B_IWB32166	245687176	81.19			31176	2A	2A_IWB31176	654021156	270.15	98.5949		73738	1B	1B_IWB73738	654027223	100.27	122.764
3854	2B	2B_IWB3854	531467034	88.39			39966	2A	2A_IWB39966	761540688	270.62	99.1944		79663	1B	1B_IWA5847	654027297	100.27	125.068
41506	2B	2B_IWB41506	532092788	88.39			10841	2A	2A_IWB10841	762503117	273.22	157.214		71472	1B	1B_IWB71472	663116963	100.29	85.0057
24879	2B	2B_IWB24879	539961920	88.39	102.225		65516	2B	2B_IWB65516	5642971	0	20.001		3140	1B	1B_IWB3140	564279288	101.01	125.263
79431	2B	2B_IWA5525	540428617	88.39	104.39		60992	2B	2B_IWB60992	1315230	7.92	20.606		631	1B	1B_IWB631	653888017	101.01	125.263
36256	2B	2B_IWB36256	552261947	89.57			42883	2B	2B_IWB42883	4645477	7.92	20.8648		8409	1B	1B_IWB8409	655798556	101.42	117.812
63790	2B	2B_IWB63790	555840834	90.75	104.39		30384	2B	2B_IWB30384	11459833	11.23	23.5092		74547	1B	1B_IWB74547	656235242	101.9
69109	2B	2B_IWB69109	556677220	91.9	106.563		59945	2B	2B_IWB59945	13166173	11.23	23.5092		26544	1B	1B_IWB26544	677911805	101.9	5.85834
67261	2B	2B_IWB67261	558290519	91.9	104.415		736	2B	2B_IWB736	10871479	14.14	26.007		14791	1B	1B_IWB14791	677912018	101.9	117.812
3627	2B	2B_IWB3627	561228468	91.9	104.39		43644	2B	2B_IWB43644	11549227	14.14	27.1982		76051	1B	1B_IWA1092	657177219	104.72	128.738
75502	2B	2B_IWA243	563859708	91.9	104.39		72375	2B	2B_IWB72375	16871375	14.14	26.1068		10786	1B	1B_IWB10786	658482763	104.72
35658	2B	2B_IWB35658	564874570	91.9			29097	2B	2B_IWB29097	17390904	16.02	26.1068		10787	1B	1B_IWB10787	658482895	104.72
36836	2B	2B_IWB36836	576691579	93.09			46230	2B	2B_IWB46230	11999646	16.48	27.1982		77320	1B	1B_IWA2818	658498673	104.72	113.77
13535	2B	2B_IWB13535	581468073	93.09			12617	2B	2B_IWB12617	17572453	16.48	27.1982		31741	1B	1B_IWB31741	659380843	104.72	130.899
44123	2B	2B_IWB44123	601334100	93.09	105.322		32198	2B	2B_IWB32198	17783428	16.98	27.878		31742	1B	1B_IWB31742	659380846	104.72	130.899
36605	2B	2B_IWB36605	610917158	93.09	106.563		20037	2B	2B_IWB20037	19395247	17.48	27.1982		31740	1B	1B_IWB31740	659381079	104.72	130.899
53902	2B	2B_IWB53902	612686386	93.09	107.006		8851	2B	2B_IWB8851	20077015	17.48	32.1626		31739	1B	1B_IWB31739	659531101	104.72
21922	2B	2B_IWB21922	616481810	93.09	104.415		45886	2B	2B_IWB45886	18632797	18.07	27.1982		73131	1B	1B_IWB73131	660012179	105.68	135.229
59086	2B	2B_IWB59086	619044538	93.09	107.006		80492	2B	2B_IWA7041	776312683	18.73			23772	1B	1B_IWB23772	660012310	105.68	135.229
37941	2B	2B_IWB37941	620594828	93.09	106.563		4596	2B	2B_IWB4596	18320580	19.82	27.1982		73132	1B	1B_IWB73132	660012310	105.68	135.229
61167	2B	2B_IWB61167	717365921	93.09			40415	2B	2B_IWB40415	655602096	19.82	27.1982		6619	1B	1B_IWB6619	660528121	105.68	132.59
50859	2B	2B_IWB50859	619753710	93.77	107.006		57369	2B	2B_IWB57369	23535487	20.8	35.1001		28819	1B	1B_IWB28819	660529867	105.68	132.134
79813	2B	2B_IWA6076	632920884	94.35	107.486		81491	2B	2B_IWA8457	63474278	20.8	62.569		40255	1B	1B_IWB40255	660531687	105.68	132.609
32140	2B	2B_IWB32140	639221010	95.16	108.038		11755	2B	2B_IWB11755	63474278	20.8	62.569		31646	1B	1B_IWB31646	661515637	105.68	133.26
14419	2B	2B_IWB14419	640103095	95.16	108.038		81154	2B	2B_IWA7936	24861140	24.11	41.3586		10582	1B	1B_IWB10582	658738539	106.25	130.899
76818	2B	2B_IWA2130	640340511	95.16	108.453		4667	2B	2B_IWB4667	26101612	28.77	42.1101		42796	1B	1B_IWB42796	660745131	106.75
77391	2B	2B_IWA2924	640341216	95.16	108.038		45061	2B	2B_IWB45061	26297643	28.77	42.4656		26010	1B	1B_IWB26010	660433162	107.86
7979	2B	2B_IWB7979	641665199	95.16	108.038		61608	2B	2B_IWB61608	26298109	28.77	42.4656		3351	1B	1B_IWB3351	662556340	109.29	113.813
7018	2B	2B_IWB7018	643297993	95.16	108.038		80281	2B	2B_IWA6767	26314179	28.77	42.4656		11006	1B	1B_IWB11006	662718706	110.39	134.208
48486	2B	2B_IWB48486	643682925	95.16	108.453		36382	2B	2B_IWB36382	26581185	29.23	47.2174		11007	1B	1B_IWB11007	662718722	110.39	134.409
35072	2B	2B_IWB35072	645309795	95.16	108.453		36077	2B	2B_IWB36077	26574993	29.76			73284	1B	1B_IWB73284	662909836	110.39	135.963
6515	2B	2B_IWB6515	646215599	95.16	108.453		45991	2B	2B_IWB45991	28389220	30.28	48.5401		36475	1B	1B_IWB36475	666256579	113.46	134.546
75660	2B	2B_IWA470	648082015	95.16	107.396		47891	2B	2B_IWB47891	28423764	31.22	48.5401		57628	1B	1B_IWB57628	666916680	115.56	137.003
45296	2B	2B_IWB45296	648920752	95.16	109.526		54720	2B	2B_IWB54720	29004184	31.76			31755	1B	1B_IWB31755	669029370	120.61	141.825
66494	2B	2B_IWB66494	651358139	95.16	107.486		32593	2B	2B_IWB32593	28273407	32.3	48.0692		8812	1B	1B_IWB8812	669650194	120.61	142.664
28677	2B	2B_IWB28677	653594410	95.16			65469	2B	2B_IWB65469	32963762	36.46	53.7353		73865	1B	1B_IWB73865	673180322	120.61	148.398
73669	2B	2B_IWB73669	653620438	95.16	114.094		12400	2B	2B_IWB12400	32064898	37.88	53.7353		61210	1B	1B_IWB61210	673743536	120.61	158.591
68982	2B	2B_IWB68982	653914439	95.86	114.094		10910	2B	2B_IWB10910	32871698	37.88	53.7353		72918	1B	1B_IWB72918	673784357	120.61	152.85
69070	2B	2B_IWB69070	653914722	95.86	108.453		76808	2B	2B_IWA2117	44426773	46.01	66.5049		72919	1B	1B_IWB72919	673784725	120.61	148.398
62876	2B	2B_IWB62876	655007158	95.86	108.453		63153	2B	2B_IWB63153	44426840	46.01	66.5049		21823	1B	1B_IWB21823	673849321	120.61	152.85
11092	2B	2B_IWB11092	655607486	95.86	108.038		23606	2B	2B_IWB23606	44922004	46.01	67.1036		35131	1B	1B_IWB35131	674079891	123.22	154.844
75710	2B	2B_IWA543	657791579	95.86	109.526		28247	2B	2B_IWB28247	36110156	46.47	69.7729		18787	1B	1B_IWB18787	674960353	123.68	145.804
76220	2B	2B_IWA1389	660461061	98.03	109.476		65494	2B	2B_IWB65494	45788713	46.47	67.5402		9613	1B	1B_IWB9613	675315784	123.68	145.804
66389	2B	2B_IWB66389	660466198	98.03	109.526		67044	2B	2B_IWB67044	46090124	46.47	69.0837		8817	1B	1B_IWB8817	675320327	123.68	158.591
47664	2B	2B_IWB47664	662684808	98.03	109.526		54981	2B	2B_IWB54981	47173023	46.47	65.6488		73713	1B	1B_IWB73713	675559614	125.51	154.844
65372	2B	2B_IWB65372	663127896	98.03	114.094		54530	2B	2B_IWB54530	47181430	46.47	70.3654		13057	1B	1B_IWB13057	678259617	127.48	158.591
79066	2B	2B_IWA5064	694954105	98.03	123.597		53589	2B	2B_IWB53589	47430632	46.47	69.7729		72247	1B	1B_IWB72247	678262860	127.48	162.136
68759	2B	2B_IWB68759	675340491	99.77	109.476		38529	2B	2B_IWB38529	47156080	47.44	65.6488		74944	1B	1B_IWB74944	678266671	127.48	153.945
28337	2B	2B_IWB28337	675345867	99.77	109.476		8063	2B	2B_IWB8063	46088370	48.41	69.0837		70716	1B	1B_IWB70716	678318098	127.48	164.893
22281	2B	2B_IWB22281	676128399	99.77	109.526		7053	2B	2B_IWB7053	46894037	48.41	65.6488		65272	1B	1B_IWB65272	679395962	127.48	164.635
102	2B	2B_IWB102	677218397	100.42			34849	2B	2B_IWB34849	47430632	48.41	69.7729		9077	1B	1B_IWB9077	679653753	127.48	160.244
78033	2B	2B_IWA3741	683028635	100.42	109.245		47158	2B	2B_IWB47158	47673052	48.41	69.7729		43736	1B	1B_IWB43736	32531430	128.08	162.136
28807	2B	2B_IWB28807	687206986	100.42	109.245		59781	2B	2B_IWB59781	47839710	48.41	69.3207		435	1B	1B_IWB435	678257416	128.08	164.726
76474	2B	2B_IWA1708	690031652	101.01	109.245		21512	2B	2B_IWB21512	47840058	48.41	65.6488		53048	1B	1B_IWB53048	678858388	128.08	74.3716
27578	2B	2B_IWB27578	680573831	101.59	109.526		23439	2B	2B_IWB23439	49329256	48.41	69.3207		71657	1B	1B_IWB71657	679653020	128.08	160.244
43278	2B	2B_IWB43278	690588623	102.13	114.094		4604	2B	2B_IWB4604	49383962	48.41			6721	1B	1B_IWB6721	679710391	128.08	160.244
18702	2B	2B_IWB18702	693368477	105.43			70198	2B	2B_IWB70198	49136221	49.53	68.9621		35151	1B	1B_IWB35151	680162619	128.08	158.591
11780	2B	2B_IWB11780	696677187	105.43	115.008		65506	2B	2B_IWB65506	46088870	50.17	1.86934		78633	1B	1B_IWA4525	681253335	128.08
78306	2B	2B_IWA4095	696677326	105.43	114.094		57823	2B	2B_IWB57823	46880398	50.17	69.0713		31957	1B	1B_IWB31957	681690519	128.08	159.022
78307	2B	2B_IWA4096	696677568	105.43	113.857		40572	2B	2B_IWB40572	51890952	50.17	71.9994		434	1B	1B_IWB434	584674520	128.56	157.78
76339	2B	2B_IWA1534	698212970	106.1	114.322		167	2B	2B_IWB167	52667576	50.17	71.9994		35036	1B	1B_IWB35036	688710381	129.29	171.314
52991	2B	2B_IWB52991	698303834	106.71	114.187		76198	2B	2B_IWA1359	52873479	50.17	71.9994		78964	1B	1B_IWA4935	688768048	129.29	146.254
42341	2B	2B_IWB42341	698587811	106.71	114.187		59248	2B	2B_IWB59248	585505839	50.17			38247	1B	1B_IWB38247	688769254	129.29	146.254
24675	2B	2B_IWB24675	698964448	106.71	114.368		51757	2B	2B_IWB51757	49559425	52.12			52979	1B	1B_IWB52979	682469918	129.5	171.314
19972	2B	2B_IWB19972	699827018	106.71	114.568		61653	2B	2B_IWB61653	49977035	53.22	71.9994		56213	1B	1B_IWB56213	682470362	129.5	164.635
69744	2B	2B_IWB69744	700741307	106.71	58.2402		21111	2B	2B_IWB21111	45787215	55.32			56212	1B	1B_IWB56212	682471767	129.5	164.635
11942	2B	2B_IWB11942	702714575	106.71	114.568		34527	2B	2B_IWB34527	47427272	55.32	69.7729		57241	1B	1B_IWB57241	687715386	130.02	164.726
21867	2B	2B_IWB21867	703615652	106.71	123.645		11939	2B	2B_IWB11939	52701779	55.32	71.9994		7641	1B	1B_IWB7641	687720416	130.02	173.624
69373	2B	2B_IWB69373	708197437	108.13			43273	2B	2B_IWB43273	56784859	58.13	74.4691		24349	1B	1B_IWB24349	687802310	130.02	173.624
69372	2B	2B_IWB69372	708197580	108.13			72380	2B	2B_IWB72380	58325008	58.6	73.7488		31066	1B	1B_IWB31066	685740824	133.14	171.425
14614	2B	2B_IWB14614	711534453	109.4			16370	2B	2B_IWB16370	58792384	59.09	73.7488		48380	1B	1B_IWB48380	685741380	133.14	173.624
31293	2B	2B_IWB31293	711718118	109.4			46469	2B	2B_IWB46469	58845575	59.09	74.8995		49490	1B	1B_IWB49490	685779966	133.14	172.673
24602	2B	2B_IWB24602	714132936	111.12	115.332		36669	2B	2B_IWB36669	66709692	60.12	76.7019		75712	1B	1B_IWA545	686843295	133.14	173.624
8450	2B	2B_IWB8450	714779769	111.12	114.911		77148	2B	2B_IWA2572	58978826	60.67	74.8995		59942	1B	1B_IWB59942	688282801	136.51
75246	2B	2B_IWB75246	715315025	111.12	115.728		3178	2B	2B_IWB3178	58979444	60.67	74.8995		9054	1D	1D_IWB9054	513124	0	9.67858
37873	2B	2B_IWB37873	716782453	111.12			49740	2B	2B_IWB49740	59179302	60.67	76.206		7273	1D	1D_IWB7273	2077082	0.48	8.36066
24230	2B	2B_IWB24230	717474744	111.12	115.728		8143	2B	2B_IWB8143	64988290	60.67			44563	1D	1D_IWB44563	2219538	0.48	3.50177
19785	2B	2B_IWB19785	723333630	111.84	116.819		10193	2B	2B_IWB10193	65100056	62.57	76.7019		11805	1D	1D_IWB11805	2219939	0.48
80206	2B	2B_IWA6670	725137277	111.84	148.431		21619	2B	2B_IWB21619	65104325	62.57			55046	1D	1D_IWB55046	417199	2.32	3.40225
8713	2B	2B_IWB8713	726126845	111.84			59623	2B	2B_IWB59623	65107033	62.57			77543	1D	1D_IWA3124	417685	2.85	0
7207	2B	2B_IWB7207	726547785	111.84			72844	2B	2B_IWB72844	65113637	62.57			63002	1D	1D_IWB63002	7555941	4.58	9.67858
41399	2B	2B_IWB41399	729768050	111.84			30115	2B	2B_IWB30115	65114016	62.57			24983	1D	1D_IWB24983	7556153	4.58	21.0452
49826	2B	2B_IWB49826	730190691	111.84			54075	2B	2B_IWB54075	65114029	62.57			80682	1D	1D_IWA7298	2091311	17.16	38.4909
28215	2B	2B_IWB28215	731312452	111.84	82.8209		72842	2B	2B_IWB72842	65114210	62.57			34473	1D	1D_IWB34473	2111062	17.16	4.57158
43924	2B	2B_IWB43924	733395020	111.84	85.219		3605	2B	2B_IWB3605	65317192	63.03			19471	1D	1D_IWB19471	2147421	17.16	3.50177
64697	2B	2B_IWB64697	738681209	113.25			25663	2B	2B_IWB25663	65466269	63.03	78.9938		45439	1D	1D_IWB45439	7039325	18.54	21.8005
34749	2B	2B_IWB34749	740315587	113.25	119.613		36919	2B	2B_IWB36919	91837868	77.8	82.4334		59230	1D	1D_IWB59230	7039601	18.54	21.8005
81463	2B	2B_IWA8406	740805225	113.25	119.613		70041	2B	2B_IWB70041	91259354	78.33	83.9582		29450	1D	1D_IWB29450	7208448	20.19	31.0397
23084	2B	2B_IWB23084	741860392	113.25			36128	2B	2B_IWB36128	91837388	78.83			47223	1D	1D_IWB47223	7351669	22.63
7265	2B	2B_IWB7265	745719282	115.65	129.081		65326	2B	2B_IWB65326	93139022	79.81	82.4677		17979	1D	1D_IWB17979	8721371	24.3	10.3328
36802	2B	2B_IWB36802	748471464	116.19			62309	2B	2B_IWB62309	93112663	80.33	81.9531		76921	1D	1D_IWA2269	8464605	24.79	28.2132
7767	2B	2B_IWB7767	750013548	118.46	130.618		50337	2B	2B_IWB50337	93125255	80.33	82.4677		78833	1D	1D_IWA4764	8623759	24.79	23.2435
80550	2B	2B_IWA7112	751261547	118.46	130.618		53506	2B	2B_IWB53506	93138456	80.33	36.5379		80430	1D	1D_IWA6960	8184870	25.43	21.8005
32354	2B	2B_IWB32354	751532660	119.19	130.618		65327	2B	2B_IWB65327	93446452	80.33	82.4677		22921	1D	1D_IWB22921	7211528	25.75
12817	2B	2B_IWB12817	751541301	120.01	130.618		12556	2B	2B_IWB12556	93803862	80.33			76227	1D	1D_IWA1397	8185547	26.09	21.8005
38059	2B	2B_IWB38059	751580675	120.67	130.618		7481	2B	2B_IWB7481	94199666	80.33			28957	1D	1D_IWB28957	8625463	26.25	23.2435
26301	2B	2B_IWB26301	752485222	121.27	130.618		36550	2B	2B_IWB36550	94927862	80.33	84.1796		77129	1D	1D_IWA2547	8727512	26.77
36334	2B	2B_IWB36334	763862057	123.68	134.46		35850	2B	2B_IWB35850	95797356	80.33	83.3938		47908	1D	1D_IWB47908	9874911	27.81	40.6354
6130	2B	2B_IWB6130	767651618	129.29	134.46		73496	2B	2B_IWB73496	104237064	83.34	86.4498		47907	1D	1D_IWB47907	9875153	27.81	28.1323
48440	2B	2B_IWB48440	769080301	129.29	139.48		47284	2B	2B_IWB47284	104242981	83.34	86.4498		75909	1D	1D_IWA817	9875275	27.81	28.2132
79558	2B	2B_IWA5697	770572419	132.98	80.7744		63879	2B	2B_IWB63879	104574455	83.34	86.4498		38400	1D	1D_IWB38400	10180482	29.17	29.1835
34394	2B	2B_IWB34394	769949884	133.66	140.481		73125	2B	2B_IWB73125	104579389	83.34	86.4498		49196	1D	1D_IWB49196	15171657	29.17
76190	2B	2B_IWA1348	760565827	135.48	151.292		59095	2B	2B_IWB59095	108238234	83.88	87.3292		80087	1D	1D_IWA6500	10180260	30.46	29.1835
40456	2B	2B_IWB40456	775169349	135.48	145.128		79985	2B	2B_IWA6364	108903901	84.4	87.4352		576	1D	1D_IWB576	10257281	30.46	29.1835
30421	2B	2B_IWB30421	775368259	136.14	144.164		26247	2B	2B_IWB26247	110479892	84.4	88.4393		2650	1D	1D_IWB2650	10383022	31.39
41532	2B	2B_IWB41532	776699362	137.51	93.4114		80887	2B	2B_IWA7567	115968566	84.4	88.9289		65070	1D	1D_IWB65070	10434175	33.41	32.9838
47814	2B	2B_IWB47814	777143525	139.03			34697	2B	2B_IWB34697	126731441	84.86	90.9714		10914	1D	1D_IWB10914	11659226	36.59	141.352
73759	2B	2B_IWB73759	777384171	139.03			78480	2B	2B_IWA4323	134090579	85.92	91.1024		14612	1D	1D_IWB14612	11879726	37.08	45.4359
11535	2B	2B_IWB11535	779673663	139.03	151.298		22543	2B	2B_IWB22543	139068437	85.92	88.4393		13406	1D	1D_IWB13406	15322246	39.9	41.7475
31342	2B	2B_IWB31342	779251503	140.18	145.128		78732	2B	2B_IWA4642	133007073	86.4	90.9714		1071	1D	1D_IWB1071	18066825	41.77	38.1113
66206	2B	2B_IWB66206	779341759	140.91	145.751		22236	2B	2B_IWB22236	134995894	86.4	88.4393		78694	1D	1D_IWA4598	31422181	61.8	67.7153
45240	2B	2B_IWB45240	779833219	140.91	145.988		11568	2B	2B_IWB11568	135003886	86.4	88.4393		79030	1D	1D_IWA5020	31424364	61.8	67.7153
501	2B	2B_IWB501	779855072	141.76	148.112		3455	2B	2B_IWB3455	136154643	86.4	88.8634		74045	1D	1D_IWB74045	32536292	61.8	118.824
7761	2B	2B_IWB7761	780779198	141.76	146.796		36600	2B	2B_IWB36600	136430582	86.4	88.4393		75370	1D	1D_IWA57	32544614	61.8	67.7153
78218	2B	2B_IWA3982	780782566	141.76			24397	2B	2B_IWB24397	138117669	86.4	88.4393		20760	1D	1D_IWB20760	93102924	67.85	75.0361
74399	2B	2B_IWB74399	780821759	141.76	146.016		56119	2B	2B_IWB56119	10826188	86.9			21928	1D	1D_IWB21928	227130166	68.15	77.891
7818	2B	2B_IWB7818	783534577	141.76	153.43		22020	2B	2B_IWB22020	132583295	86.9	88.4393		55502	1D	1D_IWB55502	189661227	68.41
75860	2B	2B_IWA746	783559319	141.76	147.47		36599	2B	2B_IWB36599	136430417	86.9	88.4393		77798	1D	1D_IWA3446	203318330	68.41	75.0361
8157	2B	2B_IWB8157	781584299	142.32	152.59		23709	2B	2B_IWB23709	153673949	86.9	92.964		2192	1D	1D_IWB2192	204295576	69.5	75.0361
55543	2B	2B_IWB55543	782152561	142.32	103.328		56514	2B	2B_IWB56514	149841689	87.47	88.0838		65746	1D	1D_IWB65746	306673149	72.04
7106	2B	2B_IWB7106	783226978	142.32	153.176		7331	2B	2B_IWB7331	17383933	88.02	92.2811		38561	1D	1D_IWB38561	268950190	72.05	78.3637
79087	2B	2B_IWA5093_1	783228849	142.32	153.176		22171	2B	2B_IWB22171	42508076	88.02	75.646		708	1D	1D_IWB708	290444008	72.05	78.3637
79087	2B	2B_IWA5093_2	783228849	142.32	153.176		48351	2B	2B_IWB48351	146717932	88.02	92.5711		61426	1D	1D_IWB61426	325964513	73.05	99.7786
79087	2B	2B_IWA5093_3	783228849	142.32	153.176		27957	2B	2B_IWB27957	146772510	88.02	92.2063		27449	1D	1D_IWB27449	308455892	74.87	81.1626
42506	2B	2B_IWB42506	784619262	142.32	30.1472		79132	2B	2B_IWA5147	148403221	88.02	92.5711		25365	1D	1D_IWB25365	337899075	78.87
48388	2B	2B_IWB48388	785890263	144.49	153.491		63570	2B	2B_IWB63570	148589581	88.02	92.2811		35246	1D	1D_IWB35246	343890012	79.36	80.7086
28160	2B	2B_IWB28160	786105100	144.49			73197	2B	2B_IWB73197	152175265	88.02	93.0108		15740	1D	1D_IWB15740	365846043	82.3	82.0458
27274	2B	2B_IWB27274	786230010	144.49	155.144		72906	2B	2B_IWB72906	152569582	88.02	92.6647		80582	1D	1D_IWA7154	351440063	82.86	81.9339
31257	2B	2B_IWB31257	787816511	144.49	155.409		80092	2B	2B_IWA6509	153223758	88.02	93.0108		34905	1D	1D_IWB34905	357459858	83.41	99.5671
12415	2B	2B_IWB12415	787819631	144.49	157.214		73834	2B	2B_IWB73834	153223758	88.02	93.0108		9807	1D	1D_IWB9807	232494180	83.81	84.2165
12022	2B	2B_IWB12022	787956682	144.49			23710	2B	2B_IWB23710	153673885	88.02	93.0108		75573	1D	1D_IWA342	392140588	85.32	82.8171
56269	2B	2B_IWB56269	769496900	148.04			53255	2B	2B_IWB53255	151908116	88.5	92.2063		17397	1D	1D_IWB17397	370629638	86.7	82.5994
28826	2B	2B_IWB28826	789601379	148.04			29827	2B	2B_IWB29827	151908116	88.5	92.2063		65822	1D	1D_IWB65822	407875162	93.33	87.3576
63562	2B	2B_IWB63562	789601873	148.04			47487	2B	2B_IWB47487	154251253	88.5	92.6647		65846	1D	1D_IWB65846	411560421	93.8	88.8503
22474	2B	2B_IWB22474	790753782	148.04	99.1944		78591	2B	2B_IWA4472	164939927	92.55	94.651		65030	1D	1D_IWB65030	412217989	94.3	90.2995
7606	2B	2B_IWB7606	793151178	148.04	159.656		77663	2B	2B_IWA3277	166472440	93.94	95.8235		7763	1D	1D_IWB7763	408238972	94.8	78.4498
55640	2B	2B_IWB55640	762291307	155.92	98.5949		56730	2B	2B_IWB56730	167469340	93.94	95.2872		79205	1D	1D_IWA5235	415413680	95.27	92.9056
45152	2D	2D_IWB45152	11197914	0	27.1982		34879	2B	2B_IWB34879	167798344	93.94	96.9867		60890	1D	1D_IWB60890	416101167	95.27	92.9056
25572	2D	2D_IWB25572	11896958	0	0.374793		7856	2B	2B_IWB7856	167798344	93.94	96.9867		27183	1D	1D_IWB27183	416458439	95.73	92.9056
6542	2D	2D_IWB6542	11459863	1.81	25.9702		58624	2B	2B_IWB58624	175640420	94.4	93.4661		23980	1D	1D_IWB23980	423251912	99.43	65.8929
11934	2D	2D_IWB11934	13680056	1.81			19542	2B	2B_IWB19542	182708311	94.4	96.9867		49445	1D	1D_IWB49445	433274834	103.82
8391	2D	2D_IWB8391	13682541	1.81	48.443		44901	2B	2B_IWB44901	184536308	95.83	96.9867		77881	1D	1D_IWA3549	436191063	104.49	115.62
61256	2D	2D_IWB61256	15623703	1.81	47.2174		52134	2B	2B_IWB52134	188256965	95.83	97.2642		5670	1D	1D_IWB5670	467034395	139.29
72027	2D	2D_IWB72027	18263284	1.81	27.1982		78998	2B	2B_IWA4983	189603319	96.33	97.2642		73445	1D	1D_IWB73445	467033488	139.84	113.813
65267	2D	2D_IWB65267	13906603	2.42	41.2182		78999	2B	2B_IWA4984	189603419	96.33	95.1469		38852	1D	1D_IWB38852	484416985	154.16	170.797
75980	2D	2D_IWA965	14778580	3.62	47.2174		58207	2B	2B_IWB58207	189619966	96.8	95.1469		7254	1D	1D_IWB7254	486068110	154.16	164.726
55334	2D	2D_IWB55334	15728939	3.62	9.49195		19446	2B	2B_IWB19446	145401379	97.27	96.9867		69582	1D	1D_IWB69582	491795998	154.16	164.726
25031	2D	2D_IWB25031	24060026	4.35	47.2174		64964	2B	2B_IWB64964	200385482	97.27	97.6945		68908	1D	1D_IWB68908	492507446	154.79	158.264
22365	2D	2D_IWB22365	18234286	5.67	11.2235		14239	2B	2B_IWB14239	210652110	97.79	96.9867		68054	1D	1D_IWB68054	489541205	155.46	161.94
7706	2D	2D_IWB7706	14897946	6.37	25.9702		65806	2B	2B_IWB65806	216853660	101.19	50.8298		6493	1D	1D_IWB6493	491051266	156.05	164.726
17339	2D	2D_IWB17339	15194290	6.37	8.52004		59170	2B	2B_IWB59170	231971783	101.73			27806	1D	1D_IWB27806	485508333	157.32	170.797
6007	2D	2D_IWB6007	16865490	6.37	25.9702		57806	2B	2B_IWB57806	232348210	101.73	96.9867		48271	1D	1D_IWB48271	485560353	157.32	163.855
5912	2D	2D_IWB5912	18232241	6.37	47.2174		45925	2B	2B_IWB45925	232260261	102.83			17607	1D	1D_IWB17607	486066929	157.32	159.576
11455	2D	2D_IWB11455	18234413	6.37	11.2235		9834	2B	2B_IWB9834	233268454	102.83	98.5271		60432	1D	1D_IWB60432	486156898	157.32	164.079
80103	2D	2D_IWA6520	89388861	78.95	47.1097		10078	2B	2B_IWB10078	235600283	103.41	96.9867		8044	1D	1D_IWB8044	486877128	157.32	164.353
32050	2D	2D_IWB32050	202087110	90.25	50.8298		59779	2B	2B_IWB59779	244572477	104.44	99.7308		37	1D	1D_IWB37	490926881	157.32	148.656
49853	2D	2D_IWB49853	212928385	90.25	51.3139		48401	2B	2B_IWB48401	236319405	104.92	99.7308		61688	1D	1D_IWB61688	491043140	157.32	163.855
46550	2D	2D_IWB46550	218376948	90.25	50.8298		4009	2B	2B_IWB4009	234636215	105.42	96.9867		15653	1D	1D_IWB15653	491049956	157.32	159.576
20112	2D	2D_IWB20112	435045172	96.23	138.737		65533	2B	2B_IWB65533	249264147	105.95	99.7308		5990	1D	1D_IWB5990	491636374	157.32	163.855
24133	2D	2D_IWB24133	455336516	98.3	61.6846		19067	2B	2B_IWB19067	238167235	107.05	99.157		19016	1D	1D_IWB19016	493026628	157.32	179.542
53594	2D	2D_IWB53594	523150765	106.06	62.5411		52921	2B	2B_IWB52921	254137377	108.06	99.1602		6300	1D	1D_IWB6300	494063317	157.32	163.855
18906	2D	2D_IWB18906	572611800	115.54	70.9681		65727	2B	2B_IWB65727	330447410	108.06	99.157		59764	1D	1D_IWB59764	488575235	157.32	164.079
44589	2D	2D_IWB44589	574351998	115.54	85.975		10875	2B	2B_IWB10875	381795128	108.55	99.7308		71970	1D	1D_IWB71970	492646464	157.95
26502	2D	2D_IWB26502	578929042	115.54	77.805		29145	2B	2B_IWB29145	381914197	108.55	99.1602		54334	2A	2A_IWB54334	255651	0	18.1862
81100	2D	2D_IWA7864	578930376	115.54	122.826		27089	2B	2B_IWB27089	385201729	109.02	99.7308		77542	2A	2A_IWA3122	528186	1.56	4.84848
28109	2D	2D_IWB28109	579535661	115.54	71.1878		38467	2B	2B_IWB38467	385202015	109.02	99.8025		31328	2A	2A_IWB31328	3333659	4.16	6.04118
26538	2D	2D_IWB26538	608198957	132.39	80.4414		79576	2B	2B_IWA5723	385564889	109.49	99.5593		5881	2A	2A_IWB5881	3962554	4.16	20.1382
26939	2D	2D_IWB26939	607673428	133.64	80.4079		77608	2B	2B_IWA3210	385573169	109.49	99.7308		27886	2A	2A_IWB27886	4330429	4.16	6.04118
26539	2D	2D_IWB26539	608199010	134.94	80.4079		78095	2B	2B_IWA3828	386313462	109.49	99.8025		55769	2A	2A_IWB55769	6292860	4.16	16.8796
54943	2D	2D_IWB54943	608917059	136.13	80.3483		2877	2B	2B_IWB2877	360299389	110.44	99.7932		21872	2A	2A_IWB21872	6986156	4.16	16.8796
75394	2D	2D_IWA96	610289339	138.09	85.975		78879	2B	2B_IWA4822	433540161	110.44	99.7932		42600	2A	2A_IWB42600	4213821	4.64	18.5719
48198	2D	2D_IWB48198	611896769	138.09	81.4059		20392	2B	2B_IWB20392	434229174	110.44	99.7932		25454	2A	2A_IWB25454	515898475	4.64	20.1382
63953	2D	2D_IWB63953	612341552	138.09	81.4059		19619	2B	2B_IWB19619	453028459	112.78	99.7308		20060	2A	2A_IWB20060	2640560	5.18	6.04118
22453	2D	2D_IWB22453	612342729	138.09	81.4059		75746	2B	2B_IWA586	453267357	112.78	99.7308		27885	2A	2A_IWB27885	2797924	5.69	4.84848
274	2D	2D_IWB274	626807985	142.3			64813	2B	2B_IWB64813	464290358	113.83	99.157		54879	2A	2A_IWB54879	3101204	5.69
28458	2D	2D_IWB28458	628937584	143.01	93.7465		8138	2B	2B_IWB8138	476560604	113.83	100.04		20059	2A	2A_IWB20059	2647502	6.25	6.04118
40683	3A	3A_IWB40683	4408743	0	14.1045		63805	2B	2B_IWB63805	510399543	119.44			77034	2A	2A_IWA2425	2646023	6.76	6.04118
65712	3A	3A_IWB65712	8865643	0	20.604		4602	2B	2B_IWB4602	522835671	119.9	101.536		66102	2A	2A_IWB66102	2646023	6.76	6.04118
11728	3A	3A_IWB11728	9466627	0	11.8367		44418	2B	2B_IWB44418	539965351	120.37	102.225		80266	2A	2A_IWA6745	3447494	6.76	17.3493
79361	3A	3A_IWA5430	10301163	0	15.5244		80439	2B	2B_IWA6969	540429044	120.37	104.39		490	2A	2A_IWB490	3962431	6.76	18.5719
8501	3A	3A_IWB8501	12253770	0	23.6304		3865	2B	2B_IWB3865	531467393	121.84			26302	2A	2A_IWB26302	43446860	11.63
8502	3A	3A_IWB8502	12253803	0	22.742		75884	2B	2B_IWA779	534842697	121.84	55.3886		65489	2A	2A_IWB65489	8369244	13.21	48.443
3472	3A	3A_IWB3472	12380707	0			41162	2B	2B_IWB41162	539283172	121.84			44423	2A	2A_IWB44423	43445962	14.77
80000	3A	3A_IWA6387	12781485	0.55	25.4387		26285	2B	2B_IWB26285	539475754	121.84			59316	2A	2A_IWB59316	10587192	15.72	21.1875
50684	3A	3A_IWB50684	13500597	2.99	15.0504		75502	2B	2B_IWA243	563859708	124.56	104.39		100	2A	2A_IWB100	10993028	15.72	25.9702
24276	3A	3A_IWB24276	13555368	3.57	15.0504		75503	2B	2B_IWA244	563860160	124.56			49592	2A	2A_IWB49592	11746006	15.72
78864	3A	3A_IWA4804	24606257	16.77	44.3129		35658	2B	2B_IWB35658	564874570	124.56			22184	2A	2A_IWB22184	7545148	19.01	19.6002
76748	3A	3A_IWA2049	34524062	29.99	59.0086		71484	2B	2B_IWB71484	555323071	126.02	106.563		22183	2A	2A_IWB22183	7545377	19.01	19.6002
80529	3A	3A_IWA7086	34524435	29.99	59.0086		63896	2B	2B_IWB63896	559427944	126.02	104.39		66734	2A	2A_IWB66734	19443359	19.12	30.0056
47869	3A	3A_IWB47869	36921160	32.39	61.0586		67084	2B	2B_IWB67084	566627219	126.48			66733	2A	2A_IWB66733	13133663	19.71	30.0056
56304	3A	3A_IWB56304	44629307	39.64			51160	2B	2B_IWB51160	571347029	127.46			30196	2A	2A_IWB30196	16077453	25.45	39.3439
50720	3A	3A_IWB50720	44630417	39.64	68.656		5082	2B	2B_IWB5082	576695938	127.95			21598	2A	2A_IWB21598	671426559	34.48	25.9702
50719	3A	3A_IWB50719	44630993	39.64	68.656		46532	2B	2B_IWB46532	47314094	128.44			39924	2A	2A_IWB39924	620708650	44.62	15.3555
32527	3A	3A_IWB32527	45598509	40.34	68.656		36041	2B	2B_IWB36041	599813170	129.42	105.322		49123	2A	2A_IWB49123	736456106	44.62	25.9702
77799	3A	3A_IWA3448	45603568	40.34	73.2239		53996	2B	2B_IWB53996	600705106	129.42	105.322		41233	2A	2A_IWB41233	21252855	45.12	47.2174
78031	3A	3A_IWA3739	46165651	40.34	75.5753		11345	2B	2B_IWB11345	635153496	132.83	112.451		6727	2A	2A_IWB6727	21261871	45.12	47.2174
32637	3A	3A_IWB32637	44009214	41.05	101.236		13216	2B	2B_IWB13216	640111395	134.19			12622	2A	2A_IWB12622	21261912	45.12	47.2174
7895	3A	3A_IWB7895	56140249	41.05	77.5657		10507	2B	2B_IWB10507	635075945	135.33	108.038		23669	2A	2A_IWB23669	21534263	45.12
24102	3A	3A_IWB24102	56219939	41.05	77.5657		8295	2B	2B_IWB8295	640489948	135.33			57168	2A	2A_IWB57168	24029515	45.12	47.2174
63098	3A	3A_IWB63098	56399941	41.05	77.5657		4886	2B	2B_IWB4886	641943063	135.33	107.639		62185	2A	2A_IWB62185	24029872	45.12
21527	3A	3A_IWB21527	56675625	41.05	77.5657		48482	2B	2B_IWB48482	643684581	135.33	108.453		11847	2A	2A_IWB11847	24278890	45.12	12.3146
73711	3A	3A_IWB73711_1	57013009	41.05	78.0586		28694	2B	2B_IWB28694	644146979	135.33	108.453		25031	2A	2A_IWB25031	24060026	45.63	47.2174
73711	3A	3A_IWB73711_2	57013009	41.62	78.0586		50645	2B	2B_IWB50645	411237207	136.75	107.486		9340	2A	2A_IWB9340	27601984	53.26	61.1413
79068	3A	3A_IWA5067	63074139	43.42	82.4161		76898	2B	2B_IWA2237	612686934	136.75	107.006		59049	2A	2A_IWB59049	27810618	53.26	62.5102
80942	3A	3A_IWA7649	68297933	43.42	83.8539		48278	2B	2B_IWB48278	617142634	136.75	107.006		76666	2A	2A_IWA1942	118994901	53.26	110.863
61873	3A	3A_IWB61873	71149373	43.42	84.4912		52433	2B	2B_IWB52433	647108830	137.29	108.453		59050	2A	2A_IWB59050	27854945	53.87
71478	3A	3A_IWB71478	71795778	43.42			65526	2B	2B_IWB65526	647316286	137.29	108.453		32285	2A	2A_IWB32285	27811161	54.44	62.5102
29898	3A	3A_IWB29898	79381552	43.42	84.4912		45933	2B	2B_IWB45933	664219545	137.83	109.476		43984	2A	2A_IWB43984	29285455	54.91	52.7385
75642	3A	3A_IWA443	81707124	43.42			6031	2B	2B_IWB6031	664219711	137.83	109.476		5525	2A	2A_IWB5525	29871835	55.43	53.1809
79136	3A	3A_IWA5151	95021415	43.42	84.7769		62974	2B	2B_IWB62974	664219756	137.83	109.476		5428	2A	2A_IWB5428	29872214	55.99	51.767
76688	3A	3A_IWA1972	101893410	43.42			48659	2B	2B_IWB48659	664219837	138.77	109.476		79605	2A	2A_IWA5762	29877256	55.99	53.1809
34922	3A	3A_IWB34922	107738831	43.42	85.0658		8421	2B	2B_IWB8421	673982517	139.7	109.526		4956	2A	2A_IWB4956	30072653	55.99	61.2816
35363	3A	3A_IWB35363	187819350	44.13			9247	2B	2B_IWB9247	686049366	140.62	110.873		81511	2A	2A_IWA8498	116000074	55.99	64.9045
40479	3A	3A_IWB40479	202638797	44.8	86.1583		4443	2B	2B_IWB4443	686818449	140.62	109.245		79604	2A	2A_IWA5760	29877339	57.02	53.1809
6920	3A	3A_IWB6920	414814569	45.39	86.1583		49323	2B	2B_IWB49323	683028761	141.14			76079	2A	2A_IWA1166	30071860	58.48	53.1809
20966	3A	3A_IWB20966	423957312	45.95	85.386		63108	2B	2B_IWB63108	683028879	141.14			17580	2A	2A_IWB17580	27824549	58.95	53.1809
8105	3A	3A_IWB8105	430790353	47.08	86.1583		36062	2B	2B_IWB36062	683029236	141.14	109.245		76112	2A	2A_IWA1242	30047950	58.95	53.1809
73154	3A	3A_IWB73154	434615887	47.08	86.1583		7226	2B	2B_IWB7226	680573506	141.64	109.073		13159	2A	2A_IWB13159	30047950	58.95	53.1809
53942	3A	3A_IWB53942	436464476	47.08	85.386		78972	2B	2B_IWA4948	660156481	142.1	109.526		1280	2A	2A_IWB1280	30866076	59.38	64.9852
39674	3A	3A_IWB39674	443816137	47.08	85.386		76220	2B	2B_IWA1389	660461061	142.1	109.476		5988	2A	2A_IWB5988	31693325	60.73	66.0643
38470	3A	3A_IWB38470	445872975	47.08	85.386		52565	2B	2B_IWB52565	137286002	142.57			38844	2A	2A_IWB38844	34499208	66.97	68.9698
73812	3A	3A_IWB73812	449511162	47.08	85.386		27578	2B	2B_IWB27578	680573831	142.57	109.526		17732	2A	2A_IWB17732	33855549	68.46	73.3909
76765	3A	3A_IWA2069	453934347	47.08	86.1583		31078	2B	2B_IWB31078	725736284	142.57			72185	2A	2A_IWB72185	40650914	72.25
67857	3A	3A_IWB67857	456704460	47.08	86.1583		53687	2B	2B_IWB53687	725736284	142.57			71517	2A	2A_IWB71517	40819957	73.36
39272	3A	3A_IWB39272	456778546	47.68	86.5224		31990	2B	2B_IWB31990	688433271	144.12			67517	2A	2A_IWB67517	40816264	73.87	79.3334
79963	3A	3A_IWA6306	466111373	48.4	85.386		60720	2B	2B_IWB60720	689484800	144.12	123.645		7033	2A	2A_IWB7033	40823104	73.87	79.3334
63730	3A	3A_IWB63730	495073247	49.76	86.6637		30560	2B	2B_IWB30560	692461455	145.55	112.946		40186	2A	2A_IWB40186	42392191	75.47	77.9105
76298	3A	3A_IWA1487	497655032	49.76	86.6637		64008	2B	2B_IWB64008	692461536	145.55	113.158		8574	2A	2A_IWB8574	43299300	78.14	77.9105
47534	3A	3A_IWB47534	504802153	49.76	86.6637		58736	2B	2B_IWB58736	704581450	149			41737	2A	2A_IWB41737	44094979	79.58	82.768
56763	3A	3A_IWB56763	507300519	50.45	88.0168		11887	2B	2B_IWB11887	704581630	149.52	125.857		71719	2A	2A_IWB71719	44836509	79.58	81.4886
10578	3A	3A_IWB10578	511754996	51.13	90.5503		26896	2B	2B_IWB26896	704721692	149.52			9401	2A	2A_IWB9401	162563755	79.58	82.768
67654	3A	3A_IWB67654	512032595	51.13	88.0168		38318	2B	2B_IWB38318	703976259	150.54	114.368		77666	2A	2A_IWA3280	162564077	79.58	79.2886
74967	3A	3A_IWB74967	514494351	52.45	88.0168		37344	2B	2B_IWB37344	706732357	151.7			78529	2A	2A_IWA4385	49176723	82.44	82.768
78955	3A	3A_IWA4922	516122827	52.45	89.3573		69373	2B	2B_IWB69373	708197437	152.23			72863	2A	2A_IWB72863	49222399	82.44	82.768
72687	3A	3A_IWB72687	517075038	52.45	88.0168		14614	2B	2B_IWB14614	711534453	153.61			72864	2A	2A_IWB72864	49222428	82.44	82.768
3210	3A	3A_IWB3210	519209987	52.45	88.0168		44545	2B	2B_IWB44545	712599701	154.99	115.008		48575	2A	2A_IWB48575	49452945	82.93	82.768
28607	3A	3A_IWB28607	526525029	52.45	89.3573		36072	2B	2B_IWB36072	712600535	154.99	115.11		9740	2A	2A_IWB9740	49848688	82.93	82.768
81071	3A	3A_IWA7826	528596660	52.45	89.3573		74201	2B	2B_IWB74201	713675758	155.45	115.332		79929	2A	2A_IWA6250	51583980	84.36	88.5371
36517	3A	3A_IWB36517	537420853	52.45	69.6		36741	2B	2B_IWB36741	715030390	155.45			50806	2A	2A_IWB50806	46107321	84.51	81.4886
30072	3A	3A_IWB30072	538847511	52.45	89.2255		28214	2B	2B_IWB28214	715717392	155.91			35347	2A	2A_IWB35347	46108342	84.51	81.4886
56927	3A	3A_IWB56927	541258101	52.45	90.5503		41607	2B	2B_IWB41607	720479473	156.83	115.797		76979	2A	2A_IWA2352	49451032	86.5	104.865
72652	3A	3A_IWB72652	543178759	52.45	89.0403		73441	2B	2B_IWB73441	720807493	156.83	115.797		6858	2A	2A_IWB6858	49851341	86.5	82.768
32556	3A	3A_IWB32556	552708655	52.99	89.4829		9044	2B	2B_IWB9044	721922228	156.83	114.817		78885	2A	2A_IWA4830	50916491	86.5
81582	3A	3A_IWA8621	530197876	53.54	90.5503		53685	2B	2B_IWB53685	722620506	157.29	115.797		51951	2A	2A_IWB51951	58670792	91.84	92.8177
14528	3A	3A_IWB14528	557421760	54.07	90.5503		73003	2B	2B_IWB73003	722620506	157.29			63547	2A	2A_IWB63547	62299513	95.19	92.2916
64832	3A	3A_IWB64832	564943946	54.07	90.5503		64930	2B	2B_IWB64930	738338799	157.81	79.5514		10490	2A	2A_IWB10490	62302232	95.19	92.2916
79250	3A	3A_IWA5286	571407300	54.07	90.5503		76133	2B	2B_IWA1272	322284021	159.01			36470	2A	2A_IWB36470	70984364	101.71	96.6319
64679	3A	3A_IWB64679	576605649	55.52	93.0399		23232	2B	2B_IWB23232	748979803	160.07	130.291		79691	2A	2A_IWA5893	71589600	101.71	97.5107
59547	3A	3A_IWB59547	576912282	55.52	93.0399		9151	2B	2B_IWB9151	728365134	160.53			77593	2A	2A_IWA3194	71623643	102.66	99.2803
46578	3A	3A_IWB46578	579377803	55.52	93.0399		10194	2B	2B_IWB10194	725961805	161.03			72481	2A	2A_IWB72481	72381588	102.66	97.5107
30296	3A	3A_IWB30296	586879779	57.55	93.0399		94	2B	2B_IWB94	703848731	161.57			78253	2A	2A_IWA4027	83927708	104.53	101.974
76577	3A	3A_IWA1831	593342541	60.03	94.5185		23390	2B	2B_IWB23390	703848868	161.57			77116	2A	2A_IWA2531	84940673	105.23	101.974
80517	3A	3A_IWA7073	600007728	61.59	95.25		5495	2B	2B_IWB5495	742472996	162.18	80.3483		21265	2A	2A_IWB21265	85599635	105.23	101.974
81439	3A	3A_IWA8374	608379938	63.3	101.005		23937	2B	2B_IWB23937	732606125	162.76			5321	2A	2A_IWB5321	104971952	106.99	101.974
936	3A	3A_IWB936	617534505	67.98	103.309		1992	2B	2B_IWB1992	725961293	163.26	82.8209		65777	2A	2A_IWB65777	111421060	106.99	103.621
10749	3A	3A_IWB10749	620212087	67.98			42842	2B	2B_IWB42842	730851132	163.26			76840	2A	2A_IWA2159	115435015	106.99	101.974
9778	3A	3A_IWB9778	623038468	69.81	103.83		11239	2B	2B_IWB11239	731481384	163.26			79321	2A	2A_IWA5378	176892097	108.66	103.97
65532	3A	3A_IWB65532	624445570	71.11	104.945		9355	2B	2B_IWB9355	731536454	163.26			64536	2A	2A_IWB64536	107382809	109.06	101.974
61883	3A	3A_IWB61883	624535298	71.69	104.728		55233	2B	2B_IWB55233	731891322	163.26			26940	2A	2A_IWB26940	278920008	111.33	104.132
73345	3A	3A_IWB73345	624534084	72.22	105.054		69674	2B	2B_IWB69674	741444830	163.26			77678	2A	2A_IWA3294	501323016	111.98	104.132
78901	3A	3A_IWA4851	625239797	72.22	105.667		4394	2B	2B_IWB4394	742524112	163.26			65453	2A	2A_IWB65453	503004751	111.98	103.97
5751	3A	3A_IWB5751	625533807	72.22	101.005		21780	2B	2B_IWB21780	743690346	163.26			41389	2A	2A_IWB41389	504076105	112.59	101.974
5794	3A	3A_IWB5794	627254091	72.22	101.005		36402	2B	2B_IWB36402	743691983	163.26			14845	2A	2A_IWB14845	504711045	112.59
76125	3A	3A_IWA1260	627676955	72.22	101.005		30597	2B	2B_IWB30597	743746363	163.26	82.8209		67490	2A	2A_IWB67490	298582962	118.25	101.974
11155	3A	3A_IWB11155	627825027	72.22	101.005		44403	2B	2B_IWB44403	748814792	163.84			45113	2A	2A_IWB45113	309690387	118.25	104.132
27980	3A	3A_IWB27980	639024949	74.43	106.703		66416	2B	2B_IWB66416	742079993	164.53			39087	2A	2A_IWB39087	337855824	118.82	101.974
79103	3A	3A_IWA5114	644804319	77.72	108.897		55708	2B	2B_IWB55708	722330128	166.41			44788	2A	2A_IWB44788	459507067	120.46	104.132
20567	3A	3A_IWB20567	645094822	77.72	108.897		59956	2B	2B_IWB59956	748425347	168.69	129.081		24815	2A	2A_IWB24815	416831785	120.96
41329	3A	3A_IWB41329	645149190	77.72	108.897		34617	2B	2B_IWB34617	748444187	170.22	134.46		47696	2A	2A_IWB47696	468305478	120.96
68593	3A	3A_IWB68593	645408093	77.72	195.099		11174	2B	2B_IWB11174	753974237	170.22	134.46		52745	2A	2A_IWB52745	468305618	120.96	99.5593
79529	3A	3A_IWA5657	645562634	77.72	108.897		25863	2B	2B_IWB25863	754864431	170.22	134.46		39681	2A	2A_IWB39681	498043625	120.96	104.132
69690	3A	3A_IWB69690	646848743	78.29	108.897		32437	2B	2B_IWB32437	754665903	170.75	76.5687		57685	2A	2A_IWB57685	498105407	120.96	104.132
40964	3A	3A_IWB40964	650041456	82.33	110.545		12574	2B	2B_IWB12574	755012102	171.75	132.473		80785	2A	2A_IWA7429	500533946	120.96	104.132
26279	3A	3A_IWB26279	650423696	82.33	110.545		9024	2B	2B_IWB9024	747144155	172.23	130.618		28385	2A	2A_IWB28385	502334613	120.96	101.974
49970	3A	3A_IWB49970	650425865	82.33	110.545		26300	2B	2B_IWB26300	752485079	172.23	130.618		74519	2A	2A_IWB74519	502622814	120.96	104.096
52010	3A	3A_IWB52010	650427560	82.33	109.946		65621	2B	2B_IWB65621	765071508	188.69			69588	2A	2A_IWB69588	502626466	120.96
27648	3A	3A_IWB27648	651627266	82.33	109.946		29809	2B	2B_IWB29809	765071660	188.69	134.46		28	2A	2A_IWB28	502626583	120.96
27647	3A	3A_IWB27647	651627366	82.33	109.946		42028	2B	2B_IWB42028	765071723	188.69	134.46		34874	2A	2A_IWB34874	504711294	121.47	104.132
79381	3A	3A_IWA5456	653242938	82.33	109.946		59281	2B	2B_IWB59281	765072016	188.69	134.46		77409	2A	2A_IWA2948	505086981	121.47	103.621
78870	3A	3A_IWA4810	653512934	82.33	109.946		61416	2B	2B_IWB61416	765072223	188.69			77561	2A	2A_IWA3151	558526626	124.05	108.463
32274	3A	3A_IWB32274	654589897	83.06	111.622		56526	2B	2B_IWB56526	765279313	188.69	134.46		61279	2A	2A_IWB61279	562604276	124.62	108.463
26056	3A	3A_IWB26056	657616589	83.7	111.622		45840	2B	2B_IWB45840	159186325	189.75			75354	2A	2A_IWA32	564503087	124.62	105.534
35924	3A	3A_IWB35924	688388254	83.7	80.129		70816	2B	2B_IWB70816	159183561	190.88	62.5805		77311	2A	2A_IWA2807	585662292	129.27	108.61
75777	3A	3A_IWA623	657947440	84.97	111.622		10706	2B	2B_IWB10706	765897855	191.4			77778	2A	2A_IWA3417	604750643	129.55
43064	3A	3A_IWB43064	657947895	84.97	111.622		36009	2B	2B_IWB36009	769307025	197.25	185.666		36324	2A	2A_IWB36324	607909124	129.55
76627	3A	3A_IWA1892	659158300	85.57	113.176		5839	2B	2B_IWB5839	769307025	197.25	185.666		6531	2A	2A_IWB6531	608608502	132
76613	3A	3A_IWA1878	659160419	85.57	113.176		34394	2B	2B_IWB34394	769949884	198.26	140.481		6986	2A	2A_IWB6986	663328967	140.38	110.992
80208	3A	3A_IWA6672	659393696	85.57	113.176		9088	2B	2B_IWB9088	770070240	198.26	136.97		71648	2A	2A_IWB71648	636209104	151.22	107.389
73699	3A	3A_IWB73699	662933621	86.97	114.554		68997	2B	2B_IWB68997	772789808	200.97	142.992		32066	2A	2A_IWB32066	678187821	151.22
23087	3A	3A_IWB23087	663580439	86.97			20875	2B	2B_IWB20875	773142143	200.97	142.992		22575	2A	2A_IWB22575	681195568	152.88
71564	3A	3A_IWB71564	662948701	87.71	114.554		67751	2B	2B_IWB67751	684076272	201.96			11810	2A	2A_IWB11810	685223728	153.42
4406	3A	3A_IWB4406	663439287	87.71	111.28		69000	2B	2B_IWB69000	772790041	202.95	142.992		49283	2A	2A_IWB49283	686857836	154.39
11684	3A	3A_IWB11684	666242544	87.71	113.857		27473	2B	2B_IWB27473	774958099	203.42	142.764		50018	2A	2A_IWB50018	686860528	154.39
35125	3A	3A_IWB35125	686785022	93.73	124.296		63210	2B	2B_IWB63210	775053184	203.89	144.164		32430	2A	2A_IWB32430	690932190	155.84	115.135
8043	3A	3A_IWB8043	688617193	94.38	129.978		9919	2B	2B_IWB9919	775337393	203.89	144.136		32429	2A	2A_IWB32429	690932208	155.84
30485	3A	3A_IWB30485	688617382	94.38	130.173		71	2B	2B_IWB71	775371493	203.89	144.164		25469	2A	2A_IWB25469	690934886	155.84
40418	3A	3A_IWB40418	688883787	94.99	130.173		71962	2B	2B_IWB71962	775172659	204.46			28453	2A	2A_IWB28453	691218466	155.84	115.135
23450	3A	3A_IWB23450	696241723	100.83	138.069		10610	2B	2B_IWB10610	777301570	210.78	151.292		47525	2A	2A_IWB47525	691224866	155.84	116.193
77105	3A	3A_IWA2518	696243396	100.83	138.069		77818	2B	2B_IWA3474	777514133	211.24	145.536		55262	2A	2A_IWB55262	691478680	155.84	115.135
7623	3A	3A_IWB7623	699765819	105.57	141.858		1796	2B	2B_IWB1796	778849230	211.7	145.751		22730	2A	2A_IWB22730	692633239	155.84	116.193
80006	3A	3A_IWA6395	699858000	105.57	141.858		29325	2B	2B_IWB29325	779254633	211.7	145.751		76784	2A	2A_IWA2092	692634022	155.84	116.193
80007	3A	3A_IWA6396	699858298	105.57	141.544		4319	2B	2B_IWB4319	779344647	211.7	145.751		46979	2A	2A_IWB46979	692636998	155.84	116.193
39724	3A	3A_IWB39724	700591297	107.85	142.646		45240	2B	2B_IWB45240	779833219	212.62	145.988		2961	2A	2A_IWB2961	692850266	155.84
34330	3A	3A_IWB34330	700737026	108.43			501	2B	2B_IWB501	779855072	212.62	148.112		77194	2A	2A_IWA2640	703875578	161.5	116.193
12652	3A	3A_IWB12652	714156164	121.87	149.487		3062	2B	2B_IWB3062	779880521	213.16	146.163		39108	2A	2A_IWB39108	703878259	161.5
49197	3A	3A_IWB49197	714300447	122.5	149.487		6618	2B	2B_IWB6618	780782797	213.75	146.796		64616	2A	2A_IWB64616	713542491	162.45	119.933
47740	3A	3A_IWB47740	714303508	122.5	149.487		74399	2B	2B_IWB74399	780821759	214.26	146.016		26200	2A	2A_IWB26200	713444679	163.24	119.933
41929	3A	3A_IWB41929	714425055	124.19	149.487		35566	2B	2B_IWB35566	782832934	214.72	151.704		51031	2A	2A_IWB51031	713445656	163.24	119.747
10899	3A	3A_IWB10899	717653817	137.05	151.747		77643	2B	2B_IWA3252	785138741	216.56	154.473		11764	2A	2A_IWB11764	715413537	164.44	123.645
13994	3A	3A_IWB13994	724201149	141.43	166.192		7580	2B	2B_IWB7580	786262838	219.92	155.144		57860	2A	2A_IWB57860	716169593	165.19	124.931
6953	3A	3A_IWB6953	724319928	141.43	166.192		70778	2B	2B_IWB70778	787286602	220.4	155.409		78521	2A	2A_IWA4374	716456284	165.67	124.808
10817	3A	3A_IWB10817	726997325	142.74	167.526		14028	2B	2B_IWB14028	611282912	220.89	155.409		81100	2A	2A_IWA7864	716457525	165.67	122.826
61868	3A	3A_IWB61868	727070435	142.74	167.526		59509	2B	2B_IWB59509	695850946	222.59	60.6243		52895	2A	2A_IWB52895	716834890	165.67	123.645
61269	3A	3A_IWB61269	728322627	144.59	173.585		32232	2B	2B_IWB32232	772436203	223.76	157.807		78522	2A	2A_IWA4375	716456217	166.03	122.826
7347	3A	3A_IWB7347	730279092	144.59			73791	2B	2B_IWB73791	772373193	224.35	103.328		11942	2A	2A_IWB11942	702714575	166.68	114.568
80539	3A	3A_IWA7099	731005499	144.59	173.152		7323	2B	2B_IWB7323	787956768	224.92			45747	2A	2A_IWB45747	717189499	166.68	114.094
3508	3A	3A_IWB3508	731222184	144.59	173.585		4120	2B	2B_IWB4120	778414518	225.42			75984	2A	2A_IWA970	718223829	166.68
12017	3A	3A_IWB12017	732042533	144.59	173.152		32334	2B	2B_IWB32334	787965115	225.42			11143	2A	2A_IWB11143	718355438	166.68
56532	3A	3A_IWB56532	732472525	144.59			9733	2B	2B_IWB9733	684759512	227.36	161.415		11194	2A	2A_IWB11194	718730537	166.68	76.3936
35582	3A	3A_IWB35582	732668328	144.59	177.242		28692	2B	2B_IWB28692	789608880	227.36	161.415		12522	2A	2A_IWB12522	718838946	167.17	125.331
78433	3A	3A_IWA4258	734129910	145.2			13362	2B	2B_IWB13362	789965438	228.29	161.415		54273	2A	2A_IWB54273	721562498	169.11	127.654
37804	3A	3A_IWB37804	734131189	145.2			46300	2B	2B_IWB46300	790228772	228.29	158.699		973	2A	2A_IWB973	719470677	169.58	125.331
1419	3A	3A_IWB1419	737014708	148.33	61.0586		7605	2B	2B_IWB7605	793151450	228.85	163.133		75001	2A	2A_IWB75001	719528069	169.58	127.382
11435	3A	3A_IWB11435	739147183	151.72	181.123		75990	2B	2B_IWA988	790749114	229.42	161.415		81109	2A	2A_IWA7876	723525853	175	128.894
72092	3A	3A_IWB72092	739276806	151.72	180.325		8698	2B	2B_IWB8698	793148351	229.42	161.415		61745	2A	2A_IWB61745	727580363	181.13	130.398
10770	3A	3A_IWB10770	739392416	151.72	177.242		39806	2B	2B_IWB39806	790754213	229.97	119.847		76680	2A	2A_IWA1960	728758530	181.6	131.97
70196	3A	3A_IWB70196	739397110	151.72	177.242		55640	2B	2B_IWB55640	795064960	233.42	98.5949		81447	2A	2A_IWA8385	728758530	181.6	131.97
50704	3A	3A_IWB50704	739734944	152.82	177.242		23407	2B	2B_IWB23407	762508086	235.18			79032	2A	2A_IWA5024	721113550	182.07	115.797
81224	3A	3A_IWA8038	742765890	153.37	187.018		34261	2B	2B_IWB34261	795064134	236.92	154.76		10182	2A	2A_IWB10182	722346909	182.07	132.741
20442	3A	3A_IWB20442	742876557	153.37			6763	2B	2B_IWB6763	795064176	236.92	99.1944		32038	2A	2A_IWB32038	728408867	182.07
78194	3A	3A_IWA3950	743192470	153.37			44576	2B	2B_IWB44576	794049870	237.5			8706	2A	2A_IWB8706	729287911	182.07	132.741
78195	3A	3A_IWA3951	743192503	153.37			25551	2B	2B_IWB25551	691597447	238.07	58.3331		8707	2A	2A_IWB8707	729288308	182.07	132.741
77357	3A	3A_IWA2870	743757924	153.37	177.242		13583	2B	2B_IWB13583	740007032	238.07	67.1406		7094	2A	2A_IWB7094	732569001	187.33	132.741
76274	3A	3A_IWA1457	744380241	153.37	184.793		9184	2B	2B_IWB9184	774831059	238.07	181.918		41366	2A	2A_IWB41366	732569649	187.33	132.741
48326	3A	3A_IWB48326	744390758	153.37	26.595		65897	2B	2B_IWB65897	793578005	238.07			11232	2A	2A_IWB11232	732569776	187.33	132.741
77577	3A	3A_IWA3177	744434431	153.37	185.405		6046	2B	2B_IWB6046	794500852	238.07	156.09		76342	2A	2A_IWA1539	733922282	192.04	133.142
60381	3A	3A_IWB60381	744664912	153.37	188.378		3970	2B	2B_IWB3970	794501126	238.07	181.918		9526	2A	2A_IWB9526	734999495	192.98	135.351
78548	3A	3A_IWA4407	746175159	153.37	188.378		42141	2B	2B_IWB42141	794501959	238.07	98.5949		6121	2A	2A_IWB6121	735007905	192.98	135.569
66009	3A	3A_IWB66009	746352481	153.37	188.378		60399	2B	2B_IWB60399	795066076	238.53			62594	2A	2A_IWB62594	734352032	193.44	130.891
3770	3A	3A_IWB3770	746633485	153.37	188.378		12598	2B	2B_IWB12598	796801998	238.99	173.352		39215	2A	2A_IWB39215	734528771	194.84	132.741
78193	3A	3A_IWA3949	743190600	153.97	187.018		58090	2B	2B_IWB58090	784191216	240.37	169.183		54915	2A	2A_IWB54915	734972837	195.32	134.75
64431	3B	3B_IWB64431	1617415	0	5.85834		23770	2B	2B_IWB23770	797590150	240.37	173.352		53046	2A	2A_IWB53046	734973568	195.32	134.75
72134	3B	3B_IWB72134	3240214	1.25	51.0723		46022	2B	2B_IWB46022	800031434	241.32	169.304		7563	2A	2A_IWB7563	733091174	198.1	132.422
72136	3B	3B_IWB72136	3241511	1.25	134.834		44158	2B	2B_IWB44158	787738787	242.9	76.5687		72716	2A	2A_IWB72716	739712880	199.07	139.351
23357	3B	3B_IWB23357	1253733	3.56	4.56078		41947	2D	2D_IWB41947	11005374	0	151.992		76750	2A	2A_IWA2051	739876805	199.07	141.655
14318	3B	3B_IWB14318	5952274	7.01	11.8367		12342	2D	2D_IWB12342	10905560	1.8	25.9702		10956	2A	2A_IWB10956	739923970	199.54	139.847
77528	3B	3B_IWA3103	6680196	7.01	13.792		19123	2D	2D_IWB19123	9579073	2.28	2.28269		10957	2A	2A_IWB10957	739924052	199.54	139.847
43766	3B	3B_IWB43766	6681124	7.01	9.7239		46392	2D	2D_IWB46392	8717238	3.77			13993	2A	2A_IWB13993	731000215	201.19	76.5687
4343	3B	3B_IWB4343	6754488	7.01	14.1045		79600	2D	2D_IWA5752	8717330	4.78	48.443		28806	2A	2A_IWB28806	734524537	201.19
80598	3B	3B_IWA7174	7064123	7.01	21.3331		13606	2D	2D_IWB13606	11039965	6.33	25.9702		28215	2A	2A_IWB28215_1	734623121	201.19	82.8209
62613	3B	3B_IWB62613	7130287	7.01	4.56078		64927	2D	2D_IWB64927	11040294	7.36	25.9702		28215	2A	2A_IWB28215_2	734623121	201.19	82.8209
80635	3B	3B_IWA7230	7187583	7.01	21.3331		12365	2D	2D_IWB12365	11094480	7.36			36028	2A	2A_IWB36028	743096726	201.2	141.655
78860	3B	3B_IWA4800	7188609	7.01	20.1354		12364	2D	2D_IWB12364	11094608	7.36			43349	2A	2A_IWB43349	743573777	201.2	141.655
3026	3B	3B_IWB3026	7604686	7.01	20.1354		9987	2D	2D_IWB9987	11242736	8.37			34772	2A	2A_IWB34772	744447878	201.2	141.401
12639	3B	3B_IWB12639	8811576	7.01	14.1045		25303	2D	2D_IWB25303	11403957	8.87			78491	2A	2A_IWA4336	740847864	202.6	141.401
46019	3B	3B_IWB46019	8811888	7.01	14.1045		7422	2D	2D_IWB7422	11477071	8.87			26553	2A	2A_IWB26553	747179726	202.6	141.401
6054	3B	3B_IWB6054	9092703	7.01	14.1045		32230	2D	2D_IWB32230	12331976	9.8	6.75124		29650	2A	2A_IWB29650	743538643	203.76	141.655
4653	3B	3B_IWB4653	9780220	7.01	25.4186		57275	2D	2D_IWB57275	12331605	10.29	25.9702		49774	2A	2A_IWB49774	744812957	203.76	143.216
29059	3B	3B_IWB29059	13898656	7.01	20.1354		76553	2D	2D_IWA1799	21950734	12.59	3.03489		81225	2A	2A_IWA8040	740366234	205.65	142.355
32683	3B	3B_IWB32683	10955409	11.05	26.9239		9992	2D	2D_IWB9992	37671654	15.23			23839	2A	2A_IWB23839	741371290	205.65
73453	3B	3B_IWB73453	10956668	11.05	26.9239		35430	2D	2D_IWB35430	13408438	17.15	25.9702		4189	2A	2A_IWB4189	741371713	205.65
57993	3B	3B_IWB57993	11087235	11.05	11.4641		51315	2D	2D_IWB51315	19395372	18.35	6.75124		8907	2A	2A_IWB8907	747090455	206.3	143.216
80940	3B	3B_IWA7647	17770999	22.03	31.5345		2494	2D	2D_IWB2494	22317761	18.88	25.9702		5743	2A	2A_IWB5743	747251775	206.3
72604	3B	3B_IWB72604	18822241	22.76	5.78583		79613	2D	2D_IWA5772	22724753	18.88	6.75124		4530	2A	2A_IWB4530	740361149	206.38	82.8209
68098	3B	3B_IWB68098	19869756	22.76	34.1999		32369	2D	2D_IWB32369	12689645	19.39			81226	2A	2A_IWA8041	740363475	206.38	142.355
11621	3B	3B_IWB11621	23600417	27.9			12110	2D	2D_IWB12110	12696269	19.39			2430	2A	2A_IWB2430	746682372	206.38	143.488
71404	3B	3B_IWB71404	23782130	27.9	37.2879		7339	2D	2D_IWB7339	12786080	19.39			5740	2A	2A_IWB5740	746763800	206.38	143.649
39127	3B	3B_IWB39127	26528765	32.55	38.7931		6976	2D	2D_IWB6976	13679322	19.39			66059	2A	2A_IWB66059	728782280	206.75
7592	3B	3B_IWB7592	29776852	38.74			76389	2D	2D_IWA1601	13909836	19.86	5.90966		7090	2A	2A_IWB7090	750066046	207.1
32646	3B	3B_IWB32646	32458897	40.06			61002	2D	2D_IWB61002	13989221	19.86	6.93743		71251	2A	2A_IWB71251	586137914	208.71
11529	3B	3B_IWB11529	40245575	41.97	52.9901		78506	2D	2D_IWA4354	14772887	20.78			3746	2A	2A_IWB3746	751511217	211.19	148.787
37006	3B	3B_IWB37006	48888853	49.82			75980	2D	2D_IWA965	14778580	21.24	47.2174		8635	2A	2A_IWB8635	750550273	211.7
77783	3B	3B_IWA3426	52731299	50.99	57.9708		16781	2D	2D_IWB16781	17605299	21.7	11.2235		9249	2A	2A_IWB9249	752559649	212.75
23630	3B	3B_IWB23630	66954023	56.6	61.6389		8540	2D	2D_IWB8540	17605428	21.7	11.2235		73086	2A	2A_IWB73086	752749824	212.75	134.46
78891	3B	3B_IWA4838	67413031	56.6	61.6389		54376	2D	2D_IWB54376	17814828	21.7	10.2777		8654	2A	2A_IWB8654	752796874	212.75
79281	3B	3B_IWA5325	68878346	56.6	61.8939		11455	2D	2D_IWB11455	18234413	21.7	11.2235		35952	2A	2A_IWB35952	753539728	214.18	143.216
12433	3B	3B_IWB12433	75959441	58.37			19149	2D	2D_IWB19149	24368905	24.31	25.9702		64018	2A	2A_IWB64018	753540797	214.18	148.787
21771	3B	3B_IWB21771	78597256	58.95	62.569		2316	2D	2D_IWB2316	33839721	26			30763	2A	2A_IWB30763	753980276	218.99	148.787
71478	3B	3B_IWB71478	71795778	59.55			9642	2D	2D_IWB9642	34419207	26.57			12358	2A	2A_IWB12358	754349286	218.99	148.787
50286	3B	3B_IWB50286	103237761	59.55	62.569		43	2D	2D_IWB43	20318304	27.08	157.72		39371	2A	2A_IWB39371	757885277	219.05	151.292
42891	3B	3B_IWB42891	106284555	59.55	62.569		49600	2D	2D_IWB49600	20631917	27.08	11.9459		10540	2A	2A_IWB10540	757918545	219.05	151.292
62742	3B	3B_IWB62742	106964490	59.55	62.569		5420	2D	2D_IWB5420	20632946	27.08	12.2364		55113	2A	2A_IWB55113	757947956	219.57	149.831
42840	3B	3B_IWB42840	107967085	59.55	62.569		50861	2D	2D_IWB50861	20770038	27.08	12.2364		27309	2A	2A_IWB27309	757948238	219.57	149.831
80277	3B	3B_IWA6761	113905090	59.55	62.569		18956	2D	2D_IWB18956	22200093	27.08	12.3853		11978	2A	2A_IWB11978	755789414	219.63	149.648
79735	3B	3B_IWA5960	114718587	59.55	62.569		60348	2D	2D_IWB60348	22204431	27.08	25.9702		72339	2A	2A_IWB72339	755930956	219.63	156.691
66011	3B	3B_IWB66011	112268424	60.11	62.569		75037	2D	2D_IWB75037	22449284	27.08	12.3853		74103	2A	2A_IWB74103	759306881	220.29	150.288
4130	3B	3B_IWB4130	109952096	60.71	62.6665		7001	2D	2D_IWB7001	29454322	37.16	18.2242		77917	2A	2A_IWA3596	759830602	220.29	151.292
24351	3B	3B_IWB24351	117577298	60.71	62.569		28572	2D	2D_IWB28572	108922133	84.73	34.1472		55863	2A	2A_IWB55863	759830917	220.29	151.292
64601	3B	3B_IWB64601	119420769	60.71	62.569		53449	2D	2D_IWB53449	110665512	84.73	34.1472		76190	2A	2A_IWA1348	760565827	220.29	151.292
50676	3B	3B_IWB50676	127292436	60.71	62.569		66107	2D	2D_IWB66107	123213900	90.78	49.5898		71057	2A	2A_IWB71057	760567102	220.29	151.292
62638	3B	3B_IWB62638	128669235	60.71	62.569		44074	2D	2D_IWB44074	137026706	93.33			4353	2A	2A_IWB4353	758397416	220.77	151.292
58793	3B	3B_IWB58793	129716092	60.71	62.3114		41295	2D	2D_IWB41295	146305543	93.33	49.5898		72299	2A	2A_IWB72299	758420918	220.89	150.288
43862	3B	3B_IWB43862	136447107	60.71	62.3114		25085	2D	2D_IWB25085	267706316	95.76	142.215		46343	2A	2A_IWB46343	776552712	220.89	162.894
78410	3B	3B_IWA4226	138503039	60.71	62.6665		81540	2D	2D_IWA8544	277937865	95.76	50.8298		4380	2A	2A_IWB4380	778722860	220.89	162.894
14946	3B	3B_IWB14946	139778064	60.71	61.6389		45857	2D	2D_IWB45857	320494760	96.26	142.215		80336	2A	2A_IWA6839	779670506	220.89	150.288
71405	3B	3B_IWB71405	140987277	60.71	62.3114		5774	2D	2D_IWB5774	369762241	100.79	52.9635		11535	2A	2A_IWB11535	779673663	220.89	151.298
48951	3B	3B_IWB48951	201871081	60.71	65.5544		18357	2D	2D_IWB18357	379106971	102.65	53.2391		72114	2A	2A_IWB72114	779818505	220.89	151.298
7733	3B	3B_IWB7733	207223999	60.71	65.7219		23322	2D	2D_IWB23322	387192928	104.83			69132	2A	2A_IWB69132	758287054	221.26	151.298
35317	3B	3B_IWB35317	214547782	60.71	65.7219		46396	2D	2D_IWB46396	382170401	105.39	54.211		39958	2A	2A_IWB39958	758396715	221.26	151.292
31829	3B	3B_IWB31829	222247227	60.71	65.7219		53903	2D	2D_IWB53903	387192948	105.39	53.7567		6580	2A	2A_IWB6580	770012827	221.58	177.436
21846	3B	3B_IWB21846	237336043	60.71	65.5544		43326	2D	2D_IWB43326	394787576	106.35	54.211		61340	2A	2A_IWB61340	758397716	222.24	150.267
79894	3B	3B_IWA6200	120611163	61.24	62.569		6349	2D	2D_IWB6349	409601404	107.78	54.211		47815	2A	2A_IWB47815	777143444	229.91	163.458
57308	3B	3B_IWB57308	175094479	61.24	63.9617		68111	2D	2D_IWB68111	423879946	110.83			54569	2A	2A_IWB54569	777358212	235.26	153.573
11646	3B	3B_IWB11646	177968498	61.24			68110	2D	2D_IWB68110	423879944	111.36	139.791		72975	2A	2A_IWB72975	770486978	242.04	103.328
12050	3B	3B_IWB12050	182382213	61.24			20112	2D	2D_IWB20112	435045172	117.7	138.737		54393	2A	2A_IWB54393	774814992	242.57	157.214
65785	3B	3B_IWB65785	187355176	61.24	65.5544		62960	2D	2D_IWB62960	459850058	123.67	57.0448		12337	2A	2A_IWB12337	774855820	242.57	103.328
35363	3B	3B_IWB35363	187819350	61.24			23534	2D	2D_IWB23534	377264206	148.49	108.722		54394	2A	2A_IWB54394	774814967	242.57	94.145
66842	3B	3B_IWB66842	189490185	61.24	65.7219		30029	2D	2D_IWB30029	572360732	148.98	77.805		79747	2A	2A_IWA5978	772965691	245.37	120.085
79682	3B	3B_IWA5880	190472778	61.24	64.5918		61821	2D	2D_IWB61821	570949805	150.91	80.4079		36745	2A	2A_IWB36745	771513369	247.25	97.0048
50759	3B	3B_IWB50759	289613629	61.24			79182	2D	2D_IWA5205	570950717	153.87	80.4079		35077	2A	2A_IWB35077	770017488	248.16	177.651
36923	3B	3B_IWB36923	368090158	61.24	65.5544		42352	2D	2D_IWB42352	570959478	155.38	80.4079		24240	2A	2A_IWB24240	771512388	249.15
22499	3B	3B_IWB22499	370966150	61.24	65.5544		76043	2D	2D_IWA1083	574109097	155.38	80.4079		64954	2A	2A_IWB64954	771514533	249.15
64490	3B	3B_IWB64490	378688267	61.24	65.7219		2984	2D	2D_IWB2984	572079992	155.9			11240	2A	2A_IWB11240	767792065	250.09	173.352
79515	3B	3B_IWA5638	379995020	61.24	65.5544		62160	2D	2D_IWB62160	574109146	156.42	80.4079		56270	2A	2A_IWB56270	769496938	250.09	183.767
75886	3B	3B_IWA781	399970896	61.24	65.5544		56369	2D	2D_IWB56369	578929290	156.42			34494	2A	2A_IWB34494	765707710	253.38	183.767
53619	3B	3B_IWB53619	403111749	61.24	65.5544		27733	2D	2D_IWB27733	588122344	159.76			77990	2A	2A_IWA3688	765710144	253.38	98.5949
38622	3B	3B_IWB38622	410043354	61.24			40492	2D	2D_IWB40492	588121857	161			31176	2A	2A_IWB31176	654021156	259.58	98.5949
37011	3B	3B_IWB37011	421531544	63.15	66.6271		74078	2D	2D_IWB74078	608918858	179.71			39966	2A	2A_IWB39966	761540688	260.05	99.1944
10591	3B	3B_IWB10591	419241149	63.79	66.6271		4589	2D	2D_IWB4589	611212092	180.19			10841	2A	2A_IWB10841	762503117	262.65	157.214
46704	3B	3B_IWB46704	434059148	65.03			22453	2D	2D_IWB22453	612342729	180.67	81.4059		65516	2B	2B_IWB65516	5642971	0	20.001
77468	3B	3B_IWA3021	440885501	65.03			39545	2D	2D_IWB39545	612518979	183.75	111.195		60992	2B	2B_IWB60992	1315230	7.92	20.606
64939	3B	3B_IWB64939	447287184	65.03	67.4547		55445	2D	2D_IWB55445	626807140	197.18			42883	2B	2B_IWB42883	4645477	7.92	20.8648
81502	3B	3B_IWA8480	447973909	65.03	67.4547		43052	2D	2D_IWB43052	626807845	197.18	134.46		32486	2B	2B_IWB32486	6337735	9.92	19.156
64191	3B	3B_IWB64191	448577279	65.03	67.1371		274	2D	2D_IWB274	626807985	197.18			80930	2B	2B_IWA7633	6338184	9.92	19.156
80906	3B	3B_IWA7595	469766813	66.76	67.4547		36668	2D	2D_IWB36668	649147923	222.09	103.328		58123	2B	2B_IWB58123	7429616	9.92	16.8796
8396	3B	3B_IWB8396	474021718	68.49	67.7847		59478	2D	2D_IWB59478	650327579	225.63			10890	2B	2B_IWB10890	8342919	9.92	16.8796
81130	3B	3B_IWA7905	480334497	68.49	67.6697		35537	2D	2D_IWB35537	647278325	229.8			9673	2B	2B_IWB9673	8344459	9.92	16.8796
62795	3B	3B_IWB62795	524451197	69.11	69.5275		75848	2D	2D_IWA728	644725413	231.67	99.1944		8365	2B	2B_IWB8365	2109722	10.49
5754	3B	3B_IWB5754	526124209	69.11	69.72		64798	2D	2D_IWB64798	635600414	242.02	97.1352		47276	2B	2B_IWB47276	2109888	10.49
8783	3B	3B_IWB8783	545010427	69.74			24368	2D	2D_IWB24368	635951888	242.02	173.352		62175	2B	2B_IWB62175	4988010	10.49	20.1601
6915	3B	3B_IWB6915	547450419	69.74	71.6503		49759	2D	2D_IWB49759	124834762	244.12	161.415		30384	2B	2B_IWB30384	11459833	11.23	23.5092
65624	3B	3B_IWB65624	550320460	69.74	71.3402		37030	3A	3A_IWB37030	32202234	0			59945	2B	2B_IWB59945	13166173	11.23	23.5092
11894	3B	3B_IWB11894	551894132	69.74	71.3402		9026	3A	3A_IWB9026	14465155	1.27			736	2B	2B_IWB736	10871479	14.14	26.007
48764	3B	3B_IWB48764	552228750	69.74	71.3402		39098	3A	3A_IWB39098	9852917	2.42	4.00484		43644	2B	2B_IWB43644	11549227	14.14	27.1982
29718	3B	3B_IWB29718	553571527	69.74			26096	3A	3A_IWB26096	1483400	3.63	0		72375	2B	2B_IWB72375	16871375	14.14	26.1068
9814	3B	3B_IWB9814	553733057	69.74	71.3402		47165	3A	3A_IWB47165	1500298	3.63	11.8367		23764	2B	2B_IWB23764	16857226	14.54	26.1068
11735	3B	3B_IWB11735	560428023	70.96	71.6503		23458	3A	3A_IWB23458	8592806	3.63			29097	2B	2B_IWB29097	17390904	16.02	26.1068
65004	3B	3B_IWB65004	567245879	72.25	70.1176		17619	3A	3A_IWB17619	2095476	4.84	15.0504		46230	2B	2B_IWB46230	11999646	16.48	27.1982
48415	3B	3B_IWB48415	571603356	72.25	70.1176		7659	3A	3A_IWB7659	7432748	4.84	15.0504		26388	2B	2B_IWB26388	17564545	16.48	27.1982
10905	3B	3B_IWB10905	578617103	73.42	72.2379		11852	3A	3A_IWB11852	7437153	4.84	20.7359		46573	2B	2B_IWB46573	17570892	16.48	27.1982
3120	3B	3B_IWB3120	579452781	74.57	72.2379		21799	3A	3A_IWB21799	32202089	4.84			12617	2B	2B_IWB12617	17572453	16.48	27.1982
6001	3B	3B_IWB6001	581979283	75.26	72.2379		56070	3A	3A_IWB56070	143521363	4.84	108.363		60877	2B	2B_IWB60877	18176463	16.48	27.1982
52079	3B	3B_IWB52079	585686362	75.26	160.904		64734	3A	3A_IWB64734	2140904	5.32	15.0504		22424	2B	2B_IWB22424	18939220	16.48	32.1626
73084	3B	3B_IWB73084	586142507	75.26	70.6801		4617	3A	3A_IWB4617	143520982	5.8	15.0504		32198	2B	2B_IWB32198	17783428	16.98	27.878
78404	3B	3B_IWA4219	586734209	75.26	73.133		53477	3A	3A_IWB53477	8686192	6.27	0		20037	2B	2B_IWB20037	19395247	17.48	27.1982
72105	3B	3B_IWB72105	590291959	75.26			28726	3A	3A_IWB28726	13909226	7.21	26.0132		8851	2B	2B_IWB8851	20077015	17.48	32.1626
46341	3B	3B_IWB46341	591366968	75.26	72.4329		61740	3A	3A_IWB61740	9171078	7.68	26.0132		10944	2B	2B_IWB10944	20373384	17.99
53138	3B	3B_IWB53138	595689830	75.26	73.133		12398	3A	3A_IWB12398	10688872	7.68	16.1021		45886	2B	2B_IWB45886	18632797	18.09	27.1982
79616	3B	3B_IWA5775	596430059	75.26	74.2632		3472	3A	3A_IWB3472	12380707	7.68			80492	2B	2B_IWA7041	776312683	18.75
39422	3B	3B_IWB39422	600753342	75.26	82.1426		38606	3A	3A_IWB38606	12980689	7.68	26.0132		4596	2B	2B_IWB4596	18320580	19.84	27.1982
53113	3B	3B_IWB53113	605449617	75.87	73.9156		57673	3A	3A_IWB57673	11381892	8.21			40415	2B	2B_IWB40415	655602096	19.84	27.1982
68592	3B	3B_IWB68592	614895047	75.87			13253	3A	3A_IWB13253	9778127	8.75	15.0504		57369	2B	2B_IWB57369	23535487	20.82	35.1001
50132	3B	3B_IWB50132	621153371	75.87			41375	3A	3A_IWB41375	12323295	8.75	24.4718		81491	2B	2B_IWA8457	63474278	20.82	62.569
46996	3B	3B_IWB46996	627906952	75.87	74.2632		24498	3A	3A_IWB24498	12976740	8.75	26.0132		11755	2B	2B_IWB11755	63474278	20.82	62.569
76090	3B	3B_IWA1196	628476413	75.87	74.2632		8502	3A	3A_IWB8502	12253803	9.28	22.742		81154	2B	2B_IWA7936	24861140	24.13	41.3586
50804	3B	3B_IWB50804	630003884	75.87	74.2632		41376	3A	3A_IWB41376	12321635	9.89			4667	2B	2B_IWB4667	26101612	28.79	42.1101
80565	3B	3B_IWA7131	637091318	75.87	75.1908		41377	3A	3A_IWB41377	12321674	9.89			45061	2B	2B_IWB45061	26297643	28.79	42.4656
633	3B	3B_IWB633	640059418	75.87	73.453		8658	3A	3A_IWB8658	12998811	9.89	21.0749		61608	2B	2B_IWB61608	26298109	28.79	42.4656
74676	3B	3B_IWB74676	647547461	75.87	75.1908		81560	3A	3A_IWA8587	7065079	10.43	26.0132		80281	2B	2B_IWA6767	26314179	28.79	42.4656
11875	3B	3B_IWB11875	648740075	75.87	73.453		50476	3A	3A_IWB50476	8686071	10.9			36382	2B	2B_IWB36382	26581185	29.25	47.2174
44984	3B	3B_IWB44984	650593809	75.87	73.453		13339	3A	3A_IWB13339	11941610	11.37	23.4326		36077	2B	2B_IWB36077	26574993	29.78
35924	3B	3B_IWB35924	688388254	87.25	80.129		1704	3A	3A_IWB1704	13496782	11.37	26.0132		45991	2B	2B_IWB45991	28389220	30.3	48.5401
75386	3B	3B_IWA81	689689617	87.25	80.129		34333	3A	3A_IWB34333	14851251	11.37	26.0132		47891	2B	2B_IWB47891	28423764	31.24	48.5401
32622	3B	3B_IWB32622	691750372	87.25			57247	3A	3A_IWB57247	17538464	11.37	33.664		54720	2B	2B_IWB54720	29004184	31.78
79958	3B	3B_IWA6299	692841353	87.25	80.129		34921	3A	3A_IWB34921	515899976	11.37	26.0132		32593	2B	2B_IWB32593	28273407	32.32	48.0692
8271	3B	3B_IWB8271	693645277	87.25	115.647		63795	3A	3A_IWB63795	13496977	11.98	21.3331		26149	2B	2B_IWB26149	28368570	33.13	48.5401
77179	3B	3B_IWA2619	694020960	87.25			24276	3A	3A_IWB24276	13555368	11.98	15.0504		65469	2B	2B_IWB65469	32963762	36.54	53.7353
79521	3B	3B_IWA5646	696737416	87.25			11649	3A	3A_IWB11649	24678634	21.17	44.8058		12400	2B	2B_IWB12400	32064898	37.96	53.7353
27888	3B	3B_IWB27888	707440220	88.63	80.9916		7237	3A	3A_IWB7237	24748784	21.17	42.649		10910	2B	2B_IWB10910	32871698	37.96	53.7353
54439	3B	3B_IWB54439	708492818	88.63	80.9916		3644	3A	3A_IWB3644	24752372	21.17	42.649		63153	2B	2B_IWB63153	44426840	46.09	66.5049
76690	3B	3B_IWA1974	708942716	88.63	80.9916		54460	3A	3A_IWB54460	24605166	21.74	47.9923		78103	2B	2B_IWA3838	42150287	46.71	65.2669
76453	3B	3B_IWA1683	715888814	88.63	80.9916		14876	3A	3A_IWB14876	24752884	21.74	44.8058		76806	2B	2B_IWA2115	44424745	47.4	67.1036
76984	3B	3B_IWA2360	734428214	94.98			43092	3A	3A_IWB43092	33969168	39.31			76653	2B	2B_IWA1929	41960988	48.11	65.2669
8645	3B	3B_IWB8645	737072037	94.98	128.641		76747	3A	3A_IWA2048	34522578	40.65	59.0086		76808	2B	2B_IWA2117	44426773	48.11	66.5049
2844	3B	3B_IWB2844	738318579	94.98			76748	3A	3A_IWA2049	34524062	40.65	59.0086		23606	2B	2B_IWB23606	44922004	48.11	67.1036
10185	3B	3B_IWB10185	738319729	94.98	82.8209		47079	3A	3A_IWB47079	34524565	41.96	59.0086		8280	2B	2B_IWB8280	47426939	48.11	69.7729
8788	3B	3B_IWB8788	738380143	94.98	123.006		59520	3A	3A_IWB59520	495473023	63.14	86.1583		28247	2B	2B_IWB28247	36110156	48.57	69.7729
8610	3B	3B_IWB8610	738684513	94.98	86.975		1822	3A	3A_IWB1822	539376448	67.27	90.5503		65494	2B	2B_IWB65494	45788713	48.57	67.5402
70218	3B	3B_IWB70218	738748940	94.98	85.5173		30070	3A	3A_IWB30070	538846606	70.25	90.5503		67044	2B	2B_IWB67044	46090124	48.57	69.0837
78481	3B	3B_IWA4324	741860729	95.53			37155	3A	3A_IWB37155	557409608	77.36	90.3117		54981	2B	2B_IWB54981	47173023	48.57	65.6488
50524	3B	3B_IWB50524	745714161	96.25	88.0751		19672	3A	3A_IWB19672	602686417	85.97	98.1791		54530	2B	2B_IWB54530	47181430	48.57	70.3654
7061	3B	3B_IWB7061	745733304	96.25	90.873		60745	3A	3A_IWB60745	615702212	87.27			53589	2B	2B_IWB53589	47430632	48.57	69.7729
74787	3B	3B_IWB74787	750137876	97.6	95.3887		35484	3A	3A_IWB35484	636446741	89.29			38529	2B	2B_IWB38529	47156080	49.54	65.6488
12260	3B	3B_IWB12260	750361340	97.6	95.3887		80566	3A	3A_IWA7132	621326759	90.49	101.005		8063	2B	2B_IWB8063	46088370	50.51	69.0837
31149	3B	3B_IWB31149	752091844	97.6	91.5181		61883	3A	3A_IWB61883	624535298	92.54	104.728		7053	2B	2B_IWB7053	46894037	50.51	65.6488
48681	3B	3B_IWB48681	755315615	97.6			58656	3A	3A_IWB58656	628698765	94.96	101.005		34849	2B	2B_IWB34849	47430632	50.51	69.7729
9095	3B	3B_IWB9095	760578628	102.48	99.4368		6793	3A	3A_IWB6793	633058149	98.34	105.667		47158	2B	2B_IWB47158	47673052	50.51	69.7729
76508	3B	3B_IWA1744	760709297	102.48			80457	3A	3A_IWA6996	633849394	98.34	105.667		59781	2B	2B_IWB59781	47839710	50.51	69.3207
74609	3B	3B_IWB74609	714951061	114.39	149.487		30159	3A	3A_IWB30159	633849431	98.34	105.667		21512	2B	2B_IWB21512	47840058	50.51	65.6488
61285	3B	3B_IWB61285	775830199	114.39	110.153		80458	3A	3A_IWA6997	633854986	98.34	105.667		23439	2B	2B_IWB23439	49329256	50.51	69.3207
7539	3B	3B_IWB7539	776031904	114.39	110.153		60142	3A	3A_IWB60142	635151811	98.81	105.667		4604	2B	2B_IWB4604	49383962	50.51
28802	3B	3B_IWB28802	780547059	117.6	139.618		25637	3A	3A_IWB25637	638208731	99.35			70198	2B	2B_IWB70198	49136221	51.63	68.9621
29814	3B	3B_IWB29814	796620389	117.6	115.799		44443	3A	3A_IWB44443	639086514	99.91	106.316		65506	2B	2B_IWB65506	46088870	52.27	1.86934
81240	3B	3B_IWA8058	783472149	119.36	119.902		70905	3A	3A_IWB70905	645995633	102.21	108.897		57823	2B	2B_IWB57823	46880398	52.27	69.0713
4246	3B	3B_IWB4246	723893139	129.18			70904	3A	3A_IWB70904	645995656	102.21	108.897		40572	2B	2B_IWB40572	51890952	52.27	71.9994
54878	3B	3B_IWB54878	724635477	129.18	160.585		70903	3A	3A_IWB70903	645995725	102.21	108.79		167	2B	2B_IWB167	52667576	52.27	71.9994
1766	3B	3B_IWB1766	794865479	129.18	124.023		70901	3A	3A_IWB70901	645995883	102.21	108.79		76198	2B	2B_IWA1359	52873479	52.27	71.9994
55652	3B	3B_IWB55652	795570699	129.18	125.365		14389	3A	3A_IWB14389	646272640	102.21	108.79		59248	2B	2B_IWB59248	585505839	52.27
22558	3B	3B_IWB22558	796315723	129.18	125.365		56626	3A	3A_IWB56626	650041783	106.54	109.946		51757	2B	2B_IWB51757	49559425	54.22
33031	3B	3B_IWB33031	796464468	129.18	125.365		56625	3A	3A_IWB56625	650041813	106.54	109.946		61653	2B	2B_IWB61653	49977035	55.32	71.9994
28159	3B	3B_IWB28159	809832553	139.99	136.312		40965	3A	3A_IWB40965	650042002	106.54	110.545		21111	2B	2B_IWB21111	45787215	57.42
71680	3B	3B_IWB71680	29355617	145.61	163.855		26279	3A	3A_IWB26279	650423696	106.54	110.545		34527	2B	2B_IWB34527	47427272	57.42	69.7729
3434	3B	3B_IWB3434	818275897	145.61	140.508		26056	3A	3A_IWB26056	657616589	108.88	111.622		11939	2B	2B_IWB11939	52701779	57.42	71.9994
19046	3B	3B_IWB19046	818442708	145.61	144.743		75051	3A	3A_IWB75051	657928221	108.88			34673	2B	2B_IWB34673	52670346	58.2	71.9994
11049	3B	3B_IWB11049	819503172	145.61	140.508		55588	3A	3A_IWB55588	495023721	109.43			44675	2B	2B_IWB44675	52700856	58.2	71.9994
43749	3B	3B_IWB43749	819789521	145.61	140.508		75777	3A	3A_IWA623	657947440	109.43	111.622		80066	2B	2B_IWA6474	52870346	58.2	71.9994
5211	3B	3B_IWB5211	822094701	145.61	143.441		35440	3A	3A_IWB35440	658902861	110	112.881		76199	2B	2B_IWA1360	52874095	58.2	71.9994
11701	3B	3B_IWB11701	822189314	145.61	140.508		76612	3A	3A_IWA1877	659160711	110	113.176		9200	2B	2B_IWB9200	54554215	58.76
10750	3B	3B_IWB10750	823762832	145.61	144.383		80593	3A	3A_IWA7169	659161919	110	113.176		43273	2B	2B_IWB43273	56784859	61.15	74.4691
10667	3B	3B_IWB10667	829197946	145.61	144.743		80208	3A	3A_IWA6672	659393696	110	113.176		72380	2B	2B_IWB72380	58325008	61.62	73.7488
10528	3B	3B_IWB10528	829203719	145.61	144.743		64060	3A	3A_IWB64060	660235219	110			16370	2B	2B_IWB16370	58792384	62.11	73.7488
45892	3B	3B_IWB45892	829541512	145.61	144.743		35470	3A	3A_IWB35470	658902861	110.53	112.9		46469	2B	2B_IWB46469	58845575	62.11	74.8995
79690	3B	3B_IWA5892	822970271	146.16	143.293		42260	3A	3A_IWB42260	661971551	110.53			77147	2B	2B_IWA2571	58978466	62.66	74.8995
72656	3B	3B_IWB72656	822972536	146.16	143.293		71564	3A	3A_IWB71564	662948701	112.35	114.554		36669	2B	2B_IWB36669	66709692	63.15	76.7019
45188	3D	3D_IWB45188	64767633	0	73.223		67124	3A	3A_IWB67124	663293066	112.83	114.554		77148	2B	2B_IWA2572	58978826	63.7	74.8995
38826	3D	3D_IWB38826	167770732	2.3	70.179		67125	3A	3A_IWB67125	663297611	112.83	114.554		3178	2B	2B_IWB3178	58979444	63.7	74.8995
34605	3D	3D_IWB34605	86353110	2.85	74.4206		30436	3A	3A_IWB30436	663438606	112.83			49740	2B	2B_IWB49740	59179302	63.7	76.206
45318	3D	3D_IWB45318	175404753	3.56	67.1522		4406	3A	3A_IWB4406	663439287	112.83	111.28		8143	2B	2B_IWB8143	64988290	63.7
78396	3D	3D_IWA4209	263354279	4.25	67.1522		48064	3A	3A_IWB48064	663580883	112.83	112.881		10193	2B	2B_IWB10193	65100056	65.6	76.7019
52061	3D	3D_IWB52061	340684070	8.56	112.568		28028	3A	3A_IWB28028	699694301	112.83	114.554		21619	2B	2B_IWB21619	65104325	65.6
55681	3D	3D_IWB55681	426485572	15.71	65.5359		73101	3A	3A_IWB73101	686783982	120.38	124.296		59623	2B	2B_IWB59623	65107033	65.6
76163	3D	3D_IWA1311	600155300	81.98	41.3807		73102	3A	3A_IWB73102	686784088	120.38	124.296		72844	2B	2B_IWB72844	65113637	65.6
76164	3D	3D_IWA1312	600155624	81.98	149.826		11580	3A	3A_IWB11580	686784181	120.86	124.296		30115	2B	2B_IWB30115	65114016	65.6
45650	3D	3D_IWB45650	600413120	83.2	149.826		63055	3A	3A_IWB63055	686785423	120.86	124.296		54075	2B	2B_IWB54075	65114029	65.6
17317	3D	3D_IWB17317	603380401	85.94	149.003		8010	3A	3A_IWB8010	686785816	120.86	124.296		72842	2B	2B_IWB72842	65114210	65.6
45351	3D	3D_IWB45351	603414586	85.94	149.003		6678	3A	3A_IWB6678	688884040	121.43	130.173		3605	2B	2B_IWB3605	65317192	66.06
81241	3D	3D_IWA8059	604362039	85.94	148.409		40420	3A	3A_IWB40420	688886994	121.43	130.173		25663	2B	2B_IWB25663	65466269	66.06	78.9938
37812	3D	3D_IWB37812	604400089	85.94	143.007		75961	3A	3A_IWA926	688673058	121.91	131.338		78402	2B	2B_IWA4216	63292314	68.21	78.0331
14491	3D	3D_IWB14491	604862563	85.94	143.007		54057	3A	3A_IWB54057	688675388	121.91	131.039		56961	2B	2B_IWB56961	65375509	69.88	76.7019
28911	3D	3D_IWB28911	609321100	85.94	148.484		8579	3A	3A_IWB8579	688688720	121.91	131.338		71719	2B	2B_IWB71719	68130687	70.65	81.4886
10748	4A	4A_IWB10748	2989817	0	8.60677		76732	3A	3A_IWA2029	688689024	121.91	131.554		39654	2B	2B_IWB39654	68363434	70.65	78.1145
34516	4A	4A_IWB34516	4595409	2.8	8.60677		40419	3A	3A_IWB40419	688887100	122.39	130.173		72086	2B	2B_IWB72086	69650680	72.02	79.1498
10389	4A	4A_IWB10389	4620085	2.8	8.60677		47680	3A	3A_IWB47680	692057479	124.45	133.611		78558	2B	2B_IWA4420	72578269	72.02	79.4928
34577	4A	4A_IWB34577	4626726	2.8	14.3318		20736	3A	3A_IWB20736	693460938	124.97	136.176		47654	2B	2B_IWB47654	72769859	72.02
33074	4A	4A_IWB33074	6028661	8.47			20737	3A	3A_IWB20737	693461697	124.97	136.176		43156	2B	2B_IWB43156	72814846	72.02	79.7485
8337	4A	4A_IWB8337	7404947	10.17	25.1939		77105	3A	3A_IWA2518	696243396	125.47	138.069		21394	2B	2B_IWB21394	69344059	72.63	79.4928
21392	4A	4A_IWB21392	7154956	10.79	25.6643		38325	3A	3A_IWB38325	693461948	125.95	136.176		59021	2B	2B_IWB59021	69346013	72.63	79.4928
11749	4A	4A_IWB11749	11811345	17.41	27.0835		3832	3A	3A_IWB3832	695502662	126.5	88.0751		80375	2B	2B_IWA6893	75608176	72.63	80.7744
6948	4A	4A_IWB6948	11811377	17.41	70.3167		899	3A	3A_IWB899	695512105	126.5	136.176		23422	2B	2B_IWB23422	76817110	72.63	81.7505
40004	4A	4A_IWB40004	16967067	20.34	30.901		7306	3A	3A_IWB7306	697390323	127.94	138.069		74618	2B	2B_IWB74618	76929201	72.63	79.4928
21309	4A	4A_IWB21309	16967586	20.34	30.901		7097	3A	3A_IWB7097	697454118	127.94	138.069		73250	2B	2B_IWB73250	77290852	72.63	79.7485
38828	4A	4A_IWB38828	17261244	21.6			12563	3A	3A_IWB12563	697456576	127.94	130.173		31001	2B	2B_IWB31001	91836588	73.69	82.1247
53771	4A	4A_IWB53771	17261481	21.6			7623	3A	3A_IWB7623	699765819	131.3	141.858		57346	2B	2B_IWB57346	94223974	73.69	81.9531
46373	4A	4A_IWB46373	21212673	23.23			80006	3A	3A_IWA6395	699858000	131.3	141.858		44618	2B	2B_IWB44618	95761959	73.69	83.3938
56172	4A	4A_IWB56172	28563674	29.38	37.0531		80007	3A	3A_IWA6396	699858298	131.3	141.544		69461	2B	2B_IWB69461	97394385	73.69
78596	4A	4A_IWA4479	41952438	37.08	42.8395		31321	3A	3A_IWB31321	700329173	131.3	141.337		39862	2B	2B_IWB39862	102421549	75.92	83.7961
76763	4A	4A_IWA2066	43699296	37.73			50481	3A	3A_IWB50481	700693482	132.86	142.765		60422	2B	2B_IWB60422	98360670	76.51	83.7961
80853	4A	4A_IWA7521	60655039	43.5	47.0176		39724	3A	3A_IWB39724	700591297	134.02	142.646		78338	2B	2B_IWA4135	102977549	76.51	84.6911
80231	4A	4A_IWA6701	70314162	47.42	47.5316		34330	3A	3A_IWB34330	700737026	134.02			72913	2B	2B_IWB72913	104062890	76.51	84.6911
41008	4A	4A_IWB41008	66146752	48.54	47.5316		29012	3A	3A_IWB29012	710794998	140.59	146.052		36919	2B	2B_IWB36919	91837868	79.65	82.4334
78086	4A	4A_IWA3818	81819486	48.54			44099	3A	3A_IWB44099	710832499	140.59	102.545		70041	2B	2B_IWB70041	91259354	80.18	83.9582
79114	4A	4A_IWA5127	86297403	48.54	47.5316		50625	3A	3A_IWB50625	710947370	141.08	146.052		36128	2B	2B_IWB36128	91837388	80.68
77978	4A	4A_IWA3671	88080923	48.54	47.5316		11287	3A	3A_IWB11287	711065491	142.26	148.027		65326	2B	2B_IWB65326	93139022	81.66	82.4677
55642	4A	4A_IWB55642	90316313	48.54	47.5316		26072	3A	3A_IWB26072	710831518	142.84	145.584		62309	2B	2B_IWB62309	93112663	82.18	81.9531
48729	4A	4A_IWB48729	290369171	50.81			26070	3A	3A_IWB26070	710832013	142.84	145.584		50337	2B	2B_IWB50337	93125255	82.18	82.4677
21228	4A	4A_IWB21228	476980555	51.98			43795	3A	3A_IWB43795	713216181	145.48	147.939		53506	2B	2B_IWB53506	93138456	82.18	36.5379
28797	4A	4A_IWB28797	481415147	51.98			49197	3A	3A_IWB49197	714300447	147.62	149.487		65327	2B	2B_IWB65327	93446452	82.18	82.4677
12806	4A	4A_IWB12806	520126362	51.98			76094	3A	3A_IWA1207	714155869	148.12			12556	2B	2B_IWB12556	93803862	82.18
1360	4A	4A_IWB1360	558217008	53.13	51.1522		12652	3A	3A_IWB12652	714156164	148.12	149.487		7481	2B	2B_IWB7481	94199666	82.18
57347	4A	4A_IWB57347	585444538	56.44	53.1262		71198	3A	3A_IWB71198	714298995	148.12	149.487		36550	2B	2B_IWB36550	94927862	82.18	84.1796
19982	4A	4A_IWB19982	595986130	61.83	58.3834		12651	3A	3A_IWB12651	714156215	148.62	149.487		35850	2B	2B_IWB35850	95797356	82.18	83.3938
49094	4A	4A_IWB49094	596506806	61.83	58.4882		76995	3A	3A_IWA2372	714302539	148.62	149.487		73496	2B	2B_IWB73496	104237064	85.19	86.4498
43375	4A	4A_IWB43375	597693615	62.49	60.7562		41929	3A	3A_IWB41929	714425055	149.64	149.487		47284	2B	2B_IWB47284	104242981	85.19	86.4498
58650	4A	4A_IWB58650	598433143	62.49	61.912		78941	3A	3A_IWA4905	716070437	150.71			63879	2B	2B_IWB63879	104574455	85.19	86.4498
5911	4A	4A_IWB5911	598433552	62.49	61.912		2461	3A	3A_IWB2461	717728758	159.75	151.829		73125	2B	2B_IWB73125	104579389	85.19	86.4498
11778	4A	4A_IWB11778	599326547	62.49	61.912		10899	3A	3A_IWB10899	717653817	160.77	151.747		59095	2B	2B_IWB59095	108238234	85.73	87.3292
81477	4A	4A_IWA8432	599490094	62.49	61.912		366	3A	3A_IWB366	717903487	160.77	151.747		79985	2B	2B_IWA6364	108903901	86.25	87.4352
5803	4A	4A_IWB5803	600899124	62.49	61.912		9606	3A	3A_IWB9606	721665960	164.42	157.611		26247	2B	2B_IWB26247	110479892	86.25	88.4393
12302	4A	4A_IWB12302	600900582	62.49	61.912		43831	3A	3A_IWB43831	721449692	165.46	156.823		80887	2B	2B_IWA7567	115968566	86.25	88.9289
9799	4A	4A_IWB9799	602245938	66.67	62.5359		24224	3A	3A_IWB24224	721452492	165.46	156.823		34697	2B	2B_IWB34697	126731441	86.71	90.9714
76486	4A	4A_IWA1720	604209054	71.56	65.9546		76202	3A	3A_IWA1367	722207862	165.93	158.356		78480	2B	2B_IWA4323	134090579	87.77	91.1024
21064	4A	4A_IWB21064	604210784	71.56	65.9546		6092	3A	3A_IWB6092	722207862	165.93	158.356		22543	2B	2B_IWB22543	139068437	87.77	88.4393
79177	4A	4A_IWA5200	604210995	71.56	65.9546		76201	3A	3A_IWA1366	722207912	165.93	158.356		78732	2B	2B_IWA4642	133007073	88.25	90.9714
10587	4A	4A_IWB10587	605664329	72.14	66.2793		81060	3A	3A_IWA7812	722214948	165.93	158.356		22236	2B	2B_IWB22236	134995894	88.25	88.4393
76459	4A	4A_IWA1691	605729749	72.14	66.2793		32649	3A	3A_IWB32649	724743199	167.94			11568	2B	2B_IWB11568	135003886	88.25	88.4393
42091	4A	4A_IWB42091	608830517	73.78	66.9543		61868	3A	3A_IWB61868	727070435	172.26	167.526		3455	2B	2B_IWB3455	136154643	88.25	88.8634
76797	4A	4A_IWA2106	609805169	73.78	66.9543		55044	3A	3A_IWB55044	729576250	173.95	169.89		36600	2B	2B_IWB36600	136430582	88.25	88.4393
8103	4A	4A_IWB8103	610493930	73.78	67.9209		29417	3A	3A_IWB29417	733492990	177.64			24397	2B	2B_IWB24397	138117669	88.25	88.4393
39801	4A	4A_IWB39801	610817240	73.78	68.2763		56227	3A	3A_IWB56227	733571264	181.59	177.242		56119	2B	2B_IWB56119	10826188	88.75
77003	4A	4A_IWA2383	611580837	73.78	69.5957		478	3A	3A_IWB478	733965007	181.59			22020	2B	2B_IWB22020	132583295	88.75	88.4393
24962	4A	4A_IWB24962	615437578	77.21	75.8091		7071	3A	3A_IWB7071	730849250	182.07	173.152		36599	2B	2B_IWB36599	136430417	88.75	88.4393
56921	4A	4A_IWB56921	616310700	77.21	74.9628		64908	3A	3A_IWB64908	731085765	182.07	174.341		23709	2B	2B_IWB23709	153673949	88.75	92.964
25688	4A	4A_IWB25688	675133388	106.84			79100	3A	3A_IWA5111	732058287	182.07	173.152		56514	2B	2B_IWB56514	149841689	89.32	88.0838
77998	4A	4A_IWA3698	666149052	109.64	105.871		10331	3A	3A_IWB10331	732494121	182.07	177.242		7331	2B	2B_IWB7331	17383933	89.87	92.2811
77502	4A	4A_IWA3068	658970232	114.47	110.131		35582	3A	3A_IWB35582	732668328	182.07	177.242		22171	2B	2B_IWB22171	42508076	89.87	75.646
68839	4A	4A_IWB68839	659014967	114.47	108.722		34554	3A	3A_IWB34554	732779682	182.07			48351	2B	2B_IWB48351	146717932	89.87	92.5711
41759	4A	4A_IWB41759	688095905	121.87	114.463		29489	3A	3A_IWB29489	569287215	182.56	173.152		27957	2B	2B_IWB27957	146772510	89.87	92.2063
50550	4A	4A_IWB50550	690970212	123.18	141.082		35035	3A	3A_IWB35035	732667346	182.56	177.242		79132	2B	2B_IWA5147	148403221	89.87	92.5711
9263	4A	4A_IWB9263	692272800	123.18	118.718		59641	3A	3A_IWB59641	733995625	183.08			63570	2B	2B_IWB63570	148589581	89.87	92.2811
66169	4A	4A_IWB66169	702701003	130.75	127.713		61557	3A	3A_IWB61557	733997225	183.08	143.007		73197	2B	2B_IWB73197	152175265	89.87	93.0108
8193	4A	4A_IWB8193	713120036	149.1	137.279		79101	3A	3A_IWA5112	733998313	183.08			72906	2B	2B_IWB72906	152569582	89.87	92.6647
12459	4A	4A_IWB12459	714295160	151.37	138.335		78433	3A	3A_IWA4258	734129910	183.57			80092	2B	2B_IWA6509	153223758	89.87	93.0108
42010	4A	4A_IWB42010	723638068	151.98	139.966		79873	3A	3A_IWA6173	734130859	183.57			73834	2B	2B_IWB73834	153223758	89.87	93.0108
22324	4A	4A_IWB22324	723810464	151.98	142.285		37804	3A	3A_IWB37804	734131189	183.57			23710	2B	2B_IWB23710	153673885	89.87	93.0108
52406	4A	4A_IWB52406	729708169	151.98	145.187		78434	3A	3A_IWA4259	734129894	184.07			76524	2B	2B_IWA1763	150707767	90.45	92.5711
52407	4A	4A_IWB52407	729709064	151.98	146.453		14956	3A	3A_IWB14956	735323794	184.07			48834	2B	2B_IWB48834	96248744	91.06
66655	4A	4A_IWB66655	732512197	151.98	147.151		79169	3A	3A_IWA5190	737677104	187.36			29827	2B	2B_IWB29827	151908116	91.68	92.2063
11988	4A	4A_IWB11988	739313577	152.66	152.986		2753	3A	3A_IWB2753	739146383	189.26	181.123		53255	2B	2B_IWB53255	151908116	91.68	92.2063
53285	4A	4A_IWB53285	739068139	153.37	154.298		11435	3A	3A_IWB11435	739147183	189.26	181.123		47487	2B	2B_IWB47487	154251253	91.68	92.6647
78908	4A	4A_IWA4859	742554448	155.41	164.13		35872	3A	3A_IWB35872	739159057	189.26	180.325		79877	2B	2B_IWA6177	157695144	94.41
68148	4A	4A_IWB68148	744272100	155.41	163.833		67817	3A	3A_IWB67817	739166671	189.26	180.325		78933	2B	2B_IWA4894	158618930	95.51	93.4661
80051	4B	4B_IWA6457	1255619	0	6.77565		67819	3A	3A_IWB67819	739166741	189.26	180.325		78591	2B	2B_IWA4472	164939927	95.55	94.651
72348	4B	4B_IWB72348	4852517	7.8	15.9127		72092	3A	3A_IWB72092	739276806	189.26	180.325		75364	2B	2B_IWA50	164089285	96.94	93.8403
931	4B	4B_IWB931	7037407	7.8	24.6658		28780	3A	3A_IWB28780	739395927	189.8	177.242		9332	2B	2B_IWB9332	165117895	96.94	94.651
75683	4B	4B_IWA506	11541110	9.96	27.3871		32739	3A	3A_IWB32739	739566237	189.8	177.242		77663	2B	2B_IWA3277	166472440	96.94	95.8235
81275	4B	4B_IWA8107	12528525	13.56	32.6582		57034	3A	3A_IWB57034	739567182	189.8	177.242		56730	2B	2B_IWB56730	167469340	96.94	95.2872
76939	4B	4B_IWA2298	12529393	13.56	32.6582		57035	3A	3A_IWB57035	739567216	189.8	177.242		34879	2B	2B_IWB34879	167798344	96.94	96.9867
80662	4B	4B_IWA7268	12892078	13.56			50704	3A	3A_IWB50704	739734944	190.97	177.242		7856	2B	2B_IWB7856	167798344	96.94	96.9867
63893	4B	4B_IWB63893	13422632	14.13	34.646		41384	3A	3A_IWB41384	742248468	191.45	104.132		46352	2B	2B_IWB46352	168610742	96.94	96.9867
70174	4B	4B_IWB70174	13976590	14.13	35.5987		59960	3A	3A_IWB59960	742614191	191.94	187.018		79812	2B	2B_IWA6075	176706026	96.94	96.9867
65475	4B	4B_IWB65475	16054922	15.51	38.9334		58893	3A	3A_IWB58893	742792708	191.94			58624	2B	2B_IWB58624	175640420	97.4	93.4661
78670	4B	4B_IWA4569	17258155	16.44	39.9308		78193	3A	3A_IWA3949	743190600	191.94	187.018		19542	2B	2B_IWB19542	182708311	97.4	96.9867
53624	4B	4B_IWB53624	17469543	16.44	39.9308		78194	3A	3A_IWA3950	743192470	191.94			44901	2B	2B_IWB44901	184536308	98.83	96.9867
34526	4B	4B_IWB34526	17470095	16.44	39.9308		78195	3A	3A_IWA3951	743192503	191.94			52134	2B	2B_IWB52134	188256965	98.83	97.2642
63876	4B	4B_IWB63876	19755397	16.44	42.885		73818	3A	3A_IWB73818	742364486	192.93			78998	2B	2B_IWA4983	189603319	99.33	97.2642
47849	4B	4B_IWB47849	18090964	17.16	41.6547		69399	3A	3A_IWB69399	749333391	196.77	188.378		78999	2B	2B_IWA4984	189603419	99.33	95.1469
80693	4B	4B_IWA7311	20746125	20.44	44.9414		72446	3A	3A_IWB72446	749404693	196.77	188.378		58207	2B	2B_IWB58207	189619966	99.8	95.1469
49875	4B	4B_IWB49875	21555133	20.44	45.7194		3584	3A	3A_IWB3584	749406389	196.77	188.378		19446	2B	2B_IWB19446	145401379	100.27	96.9867
24098	4B	4B_IWB24098	23657337	22.84	47.6318		7492	3A	3A_IWB7492	229360800	197.28			64964	2B	2B_IWB64964	200385482	100.27	97.6945
33162	4B	4B_IWB33162	31709358	35.69	52.7007		63934	3A	3A_IWB63934	749278597	197.28	193.778		14239	2B	2B_IWB14239	210652110	100.79	96.9867
7508	4B	4B_IWB7508	31875304	35.69	54.637		63935	3A	3A_IWB63935	749278654	197.28	187.018		76047	2B	2B_IWA1087	180616436	102.12	96.1354
56078	4B	4B_IWB56078	32250770	35.69	54.637		72216	3A	3A_IWB72216	749278654	197.28	193.778		77785	2B	2B_IWA3428	182013653	102.12	96.1354
39025	4B	4B_IWB39025	33624656	35.69	52.7007		42119	3B	3B_IWB42119	8336780	0	14.1045		80327	2B	2B_IWA6830	184493270	102.85	96.1354
76867	4B	4B_IWA2194	36644919	37.3			57993	3B	3B_IWB57993	11087235	3.09	11.4641		8099	2B	2B_IWB8099	184661676	102.85	96.1354
6994	4B	4B_IWB6994	45511484	38.44	59.5072		50547	3B	3B_IWB50547	8808107	5.24	14.1045		76639	2B	2B_IWA1912	185762984	103.43	96.9867
12856	4B	4B_IWB12856	46621251	38.44	59.9424		32683	3B	3B_IWB32683	10955409	8.29	26.9239		26221	2B	2B_IWB26221	189745264	103.43	95.1469
35104	4B	4B_IWB35104	49761591	38.44	59.5072		1836	3B	3B_IWB1836	3989873	10.75	11.8742		65806	2B	2B_IWB65806	216853660	103.91	50.8298
5248	4B	4B_IWB5248	184606550	43.46	62.9995		8289	3B	3B_IWB8289	6178640	10.75	11.8367		59170	2B	2B_IWB59170	231971783	104.45
34895	4B	4B_IWB34895	428704415	45.68	65.5905		42186	3B	3B_IWB42186	6666372	10.75	11.8367		57806	2B	2B_IWB57806	232348210	104.45	96.9867
80989	4B	4B_IWA7711	459922134	46.75	69.7786		28314	3B	3B_IWB28314	7189460	12.56			45925	2B	2B_IWB45925	232260261	105.55
78275	4B	4B_IWA4055	469016722	48.43	66.5741		56978	3B	3B_IWB56978	13966476	13.25	7.13458		9834	2B	2B_IWB9834	233268454	105.55	98.5271
70599	4B	4B_IWB70599	480922743	48.43	66.5741		62455	3B	3B_IWB62455	8806882	13.97	14.1045		10078	2B	2B_IWB10078	235600283	106.13	96.9867
11963	4B	4B_IWB11963	497229357	49.11	71.4614		8773	3B	3B_IWB8773	17596080	14.6	31.9421		52025	2B	2B_IWB52025	214562066	106.23	99.7308
39214	4B	4B_IWB39214	499848937	49.11	72.5238		8163	3B	3B_IWB8163	18026098	14.6	33.7273		49755	2B	2B_IWB49755	216459803	106.78	96.9867
78134	4B	4B_IWA3874	506146445	49.11	72.3182		427	3B	3B_IWB427	21002980	19.76	34.6075		59779	2B	2B_IWB59779	244572477	107.03	99.7308
34413	4B	4B_IWB34413	527297720	53.12	69.8643		58617	3B	3B_IWB58617	22075377	19.76	35.7676		23294	2B	2B_IWB23294	227080990	107.42	96.9867
28344	4B	4B_IWB28344	530522905	53.12	70.6594		71404	3B	3B_IWB71404	23782130	24.45	37.2879		12642	2B	2B_IWB12642	237177078	107.42	98.5271
71823	4B	4B_IWB71823	532627451	53.12	70.9061		34284	3B	3B_IWB34284	25962532	26.75	63.0718		27246	2B	2B_IWB27246	239647325	107.42	97.6041
13720	4B	4B_IWB13720	533724474	53.12	71.4614		63385	3B	3B_IWB63385	26490546	26.75	1.03015		23529	2B	2B_IWB23529	242825134	107.42	99.157
32990	4B	4B_IWB32990	535049948	53.12	71.4614		10863	3B	3B_IWB10863	53567376	58.36	57.9708		48401	2B	2B_IWB48401	236319405	107.49	99.7308
44330	4B	4B_IWB44330	542752177	53.12	70.9061		73082	3B	3B_IWB73082	53804337	59.33	59.7786		4009	2B	2B_IWB4009	234636215	107.99	96.9867
10761	4B	4B_IWB10761	544296530	53.12	75.646		75861	3B	3B_IWA747	55456851	60.77	61.6389		65533	2B	2B_IWB65533	249264147	108.52	99.7308
77270	4B	4B_IWA2745	545030493	53.12	71.4614		14564	3B	3B_IWB14564	55456851	60.77	61.6389		63406	2B	2B_IWB63406	248149824	108.9	99.7308
52994	4B	4B_IWB52994	548862990	53.12	71.4614		49982	3B	3B_IWB49982	55736390	60.77	61.6389		19067	2B	2B_IWB19067	238167235	109.57	99.157
76000	4B	4B_IWA1007	552018152	53.12	72.1365		5902	3B	3B_IWB5902	59064210	61.24	59.161		34710	2B	2B_IWB34710	239381463	109.67	101.974
9697	4B	4B_IWB9697	557453045	53.12	71.9138		58218	3B	3B_IWB58218	59064855	61.24	59.7786		74681	2B	2B_IWB74681	240318304	109.67	99.157
39627	4B	4B_IWB39627	558546999	53.12	71.9138		42771	3B	3B_IWB42771	59962915	61.24	59.6911		32166	2B	2B_IWB32166	245687176	109.67
55675	4B	4B_IWB55675	562356579	53.12	71.4614		33757	3B	3B_IWB33757	60255740	61.24	61.6389		52921	2B	2B_IWB52921	254137377	110.49	99.1602
76419	4B	4B_IWA1641	564393308	53.12			80399	3B	3B_IWA6919	60865535	61.24	57.2382		65727	2B	2B_IWB65727	330447410	110.49	99.157
43257	4B	4B_IWB43257	565578780	53.12			62905	3B	3B_IWB62905	63409872	61.24	60.2512		10875	2B	2B_IWB10875	381795128	110.98	99.7308
69664	4B	4B_IWB69664	573276005	53.12	75.646		39309	3B	3B_IWB39309	89689646	61.78	60.2512		29145	2B	2B_IWB29145	381914197	110.98	99.1602
976	4B	4B_IWB976	577049369	53.12	71.4614		42446	3B	3B_IWB42446	63114405	62.32	60.2512		27089	2B	2B_IWB27089	385201729	111.45	99.7308
40320	4B	4B_IWB40320	577655390	53.12	71.29		65864	3B	3B_IWB65864	63393786	62.32	60.2512		38467	2B	2B_IWB38467	385202015	111.45	99.8025
60954	4B	4B_IWB60954	579101620	53.12	73.8604		39644	3B	3B_IWB39644	64696881	62.8	60.2512		79576	2B	2B_IWA5723	385564889	111.92	99.5593
21439	4B	4B_IWB21439	589178247	53.7	73.8399		8954	3B	3B_IWB8954	64699148	62.8	60.2512		77608	2B	2B_IWA3210	385573169	111.92	99.7308
39484	4B	4B_IWB39484	589809824	53.7	73.4629		78026	3B	3B_IWA3732	64702500	62.8	60.2512		78095	2B	2B_IWA3828	386313462	111.92	99.8025
50753	4B	4B_IWB50753	590442040	53.7	74.9537		29116	3B	3B_IWB29116	23958744	63.27	61.6389		2877	2B	2B_IWB2877	360299389	112.87	99.7932
54629	4B	4B_IWB54629	596344063	54.39	73.8399		22503	3B	3B_IWB22503	32532638	63.27	174.096		78879	2B	2B_IWA4822	433540161	112.87	99.7932
65415	4B	4B_IWB65415	612759992	55.12	113.146		25735	3B	3B_IWB25735	65558416	63.27	60.7212		20392	2B	2B_IWB20392	434229174	112.87	99.7932
71910	4B	4B_IWB71910	536516142	56.61			57066	3B	3B_IWB57066	65561828	63.27	60.9813		19619	2B	2B_IWB19619	453028459	115.21	99.7308
76849	4B	4B_IWA2171	594872795	57.45	73.8399		78154	3B	3B_IWA3896	66186022	63.27			75746	2B	2B_IWA586	453267357	115.21	99.7308
77483	4B	4B_IWA3041	638116245	62.08	81.7157		45902	3B	3B_IWB45902	66186896	63.27	61.8939		64813	2B	2B_IWB64813	464290358	116.26	99.157
7462	4B	4B_IWB7462	642946159	66.82	85.8763		76275	3B	3B_IWA1459	67942455	63.27	61.9089		8138	2B	2B_IWB8138	476560604	116.26	100.04
72696	4B	4B_IWB72696	643650789	69.33	86.9902		59423	3B	3B_IWB59423	69604948	63.27			3854	2B	2B_IWB3854	531467034	117.94
72130	4B	4B_IWB72130	644785534	69.33	86.5549		12551	3B	3B_IWB12551	70909539	63.27	61.8939		41506	2B	2B_IWB41506	532092788	117.94
77665	4B	4B_IWA3279	644790230	69.33	86.9902		25874	3B	3B_IWB25874	114718900	63.73	62.3114		24879	2B	2B_IWB24879	539961920	117.94	102.225
80596	4B	4B_IWA7172	645071934	69.33	164.13		59419	3B	3B_IWB59419	129721370	63.73	62.569		79431	2B	2B_IWA5525	540428617	117.94	104.39
55667	4B	4B_IWB55667	645300276	69.33	89.4407		55784	3B	3B_IWB55784	132007106	64.2	62.3114		36256	2B	2B_IWB36256	552261947	119.12
45261	4B	4B_IWB45261	651992206	80.01			37373	3B	3B_IWB37373	134274577	64.2	62.6665		63790	2B	2B_IWB63790	555840834	120.3	104.39
43626	4B	4B_IWB43626	652283224	80.64	97.2959		11463	3B	3B_IWB11463	140490793	64.2	62.6665		63805	2B	2B_IWB63805	510399543	121.29
48353	4B	4B_IWB48353	653011491	80.64	97.7346		66513	3B	3B_IWB66513	140852020	64.2	62.3114		4602	2B	2B_IWB4602	522835671	121.75	101.536
10341	4B	4B_IWB10341	653949465	83.4	100.665		71405	3B	3B_IWB71405	140987277	64.2	62.3114		44418	2B	2B_IWB44418	539965351	122.22	102.225
78062	4B	4B_IWA3781	657299537	87.73	104.788		78824	3B	3B_IWA4755	141125995	64.2	62.3114		80439	2B	2B_IWA6969	540429044	122.22	104.39
43355	4B	4B_IWB43355	657825649	87.73	104.788		9734	3B	3B_IWB9734	141132897	64.2	62.3114		3865	2B	2B_IWB3865	531467393	123.69
8859	4B	4B_IWB8859	660719506	93.01	110.84		36396	3B	3B_IWB36396	145313431	65.6	62.6665		75884	2B	2B_IWA779	534842697	123.69	55.3886
7958	4B	4B_IWB7958	663106686	96.72	113.671		79924	3B	3B_IWA6244	145904393	65.6	62.6665		41162	2B	2B_IWB41162	539283172	123.69
7957	4B	4B_IWB7957	663106715	96.72	114.305		61016	3B	3B_IWB61016	145904393	65.6	62.6665		26285	2B	2B_IWB26285	539475754	123.69
78054	4B	4B_IWA3770	664774097	97.34	114.871		59540	3B	3B_IWB59540	159568778	68.57	63.1766		69109	2B	2B_IWB69109	556677220	126.41	106.563
51435	4B	4B_IWB51435	665568389	98	114.871		75323	3B	3B_IWB75323	172322698	69.56	63.8367		67261	2B	2B_IWB67261	558290519	126.41	104.415
7005	4D	4D_IWB7005	3436415	0	18.3989		35148	3B	3B_IWB35148	184963029	69.56			3627	2B	2B_IWB3627	561228468	126.41	104.39
60510	4D	4D_IWB60510	3252832	1.59			60893	3B	3B_IWB60893	184962380	70.1			75502	2B	2B_IWA243	563859708	126.41	104.39
34423	4D	4D_IWB34423	1876448	2.31	9.3295		21846	3B	3B_IWB21846	237336053	70.75	65.5544		75503	2B	2B_IWA244	563860160	126.41
49180	4D	4D_IWB49180	6024164	8.29	25.6186		2211	3B	3B_IWB2211	222248626	71.38	65.8445		35658	2B	2B_IWB35658	564874570	126.41
78949	4D	4D_IWA4916	25441230	49.23	55.5453		23862	3B	3B_IWB23862	224279427	71.38	67.4547		71484	2B	2B_IWB71484	555323071	127.87	106.563
30317	4D	4D_IWB30317	108902934	65.84	83.8442		51041	3B	3B_IWB51041	292022636	72.86			63896	2B	2B_IWB63896	559427944	127.87	104.39
51904	4D	4D_IWB51904	110955795	66.49	80.9019		21844	3B	3B_IWB21844	237336215	74.28	65.5544		67084	2B	2B_IWB67084	566627219	128.33
76464	4D	4D_IWA1696	149998265	67.62	85.1158		79612	3B	3B_IWA5770	424792590	74.89	65.5544		51160	2B	2B_IWB51160	571347029	129.31
59507	4D	4D_IWB59507	263948709	67.62	83.8442		68368	3B	3B_IWB68368	242168670	75.91	63.9617		5082	2B	2B_IWB5082	576695938	129.8
80783	4D	4D_IWA7427	359635338	68.8	85.7228		15024	3B	3B_IWB15024	244985329	75.91	63.8367		46532	2B	2B_IWB46532	47314094	130.29
55185	4D	4D_IWB55185	379240346	70.02	86.2892		35464	3B	3B_IWB35464	306737413	76.38	65.7069		36041	2B	2B_IWB36041	599813170	131.27	105.322
75657	4D	4D_IWA465	438257191	74.69	90.9829		28234	3B	3B_IWB28234	416279752	76.38	65.5544		53996	2B	2B_IWB53996	600705106	131.27	105.322
76419	4D	4D_IWA1641	451175923	76.74			37257	3B	3B_IWB37257	417265398	76.84	65.5544		36836	2B	2B_IWB36836	576691579	133.23
9171	4D	4D_IWB9171	455758830	78.25	94.2199		72456	3B	3B_IWB72456	417373717	76.84	66.362		13535	2B	2B_IWB13535	581468073	133.23
77885	4D	4D_IWA3555	444526653	80.39	92.1101		10591	3B	3B_IWB10591	419241149	76.84	66.6271		44123	2B	2B_IWB44123	601334100	133.23	105.322
35058	4D	4D_IWB35058	481616870	93.91	102.833		41807	3B	3B_IWB41807	419556945	76.84	66.6271		36605	2B	2B_IWB36605	610917158	133.23	106.563
71133	5A	5A_IWB71133	665225	0	7.28006		80180	3B	3B_IWA6633	419557050	76.84	66.6271		53902	2B	2B_IWB53902	612686386	133.23	107.006
79712	5A	5A_IWA5923	2122207	1.08	15.8564		80195	3B	3B_IWA6655	422524822	76.84	65.5544		21922	2B	2B_IWB21922	616481810	133.23	104.415
77894	5A	5A_IWA3566	2122622	1.08	15.8564		3505	3B	3B_IWB3505	449164987	76.84	67.4547		59086	2B	2B_IWB59086	619044538	133.23	107.006
60191	5A	5A_IWB60191	5998441	6.51	23.458		55271	3B	3B_IWB55271	221984388	78.23			37941	2B	2B_IWB37941	620594828	133.23	106.563
12158	5A	5A_IWB12158	8059452	12.02	25.2715		36433	3B	3B_IWB36433	241391873	78.79	64.7493		61167	2B	2B_IWB61167	717365921	133.23
43091	5A	5A_IWB43091	8239020	12.02	25.2715		37185	3B	3B_IWB37185	220781063	79.31	65.7219		50859	2B	2B_IWB50859	619753710	133.91	107.006
41715	5A	5A_IWB41715	8244602	12.02			13382	3B	3B_IWB13382	227835745	79.31	64.7868		11345	2B	2B_IWB11345	635153496	134.39	112.451
71078	5A	5A_IWB71078	19233447	21.7	35.3757		25955	3B	3B_IWB25955	245969143	79.31	65.7219		79813	2B	2B_IWA6076	632920884	134.54	107.486
41931	5A	5A_IWB41931	19271034	21.7	35.5734		22602	3B	3B_IWB22602	246146902	79.31	64.7868		32140	2B	2B_IWB32140	639221010	135.35	108.038
64449	5A	5A_IWB64449	19667864	21.7	19.6811		2032	3B	3B_IWB2032	176858944	79.86			14419	2B	2B_IWB14419	640103095	135.35	108.038
30698	5A	5A_IWB30698	19979291	21.7	35.3757		45768	3B	3B_IWB45768	230336648	79.86	63.8367		76818	2B	2B_IWA2130	640340511	135.35	108.453
33515	5A	5A_IWB33515	21184881	21.7	20.2342		60252	3B	3B_IWB60252	453996685	82.99	67.4547		77391	2B	2B_IWA2924	640341216	135.35	108.038
76689	5A	5A_IWA1973	36319184	31.17	39.6199		70783	3B	3B_IWB70783	178354325	84.44			7979	2B	2B_IWB7979	641665199	135.35	108.038
7718	5A	5A_IWB7718	46230667	35.67	43.2669		38228	3B	3B_IWB38228	178354332	84.44	67.4547		7018	2B	2B_IWB7018	643297993	135.35	108.038
10981	5A	5A_IWB10981	46234121	35.67	43.2669		41191	3B	3B_IWB41191	589660491	85.04	67.4547		48486	2B	2B_IWB48486	643682925	135.35	108.453
49259	5A	5A_IWB49259	46621901	35.67	43.2669		70784	3B	3B_IWB70784	178354186	85.74	68.8699		35072	2B	2B_IWB35072	645309795	135.35	108.453
79332	5A	5A_IWA5395	46716900	35.67	43.2669		26717	3B	3B_IWB26717	447022731	85.74	67.1371		6515	2B	2B_IWB6515	646215599	135.35	108.453
11872	5A	5A_IWB11872	47448717	35.67	43.2669		64939	3B	3B_IWB64939	447287184	85.74	67.4547		75660	2B	2B_IWA470	648082015	135.35	107.396
78583	5A	5A_IWA4454	47459425	35.67	43.2669		74434	3B	3B_IWB74434	452554552	85.74	67.4547		45296	2B	2B_IWB45296	648920752	135.35	109.526
7316	5A	5A_IWB7316	47644969	35.67	43.2669		31434	3B	3B_IWB31434	455677696	85.74	67.4547		66494	2B	2B_IWB66494	651358139	135.35	107.486
77525	5A	5A_IWA3100	48171463	35.67	43.3788		63983	3B	3B_IWB63983	455679501	85.74	67.7847		28677	2B	2B_IWB28677	653594410	135.35
75108	5A	5A_IWB75108	48894719	35.67	43.2669		236	3B	3B_IWB236	452103444	86.21	67.1971		73669	2B	2B_IWB73669	653620438	135.35	114.094
80885	5A	5A_IWA7565	48968542	35.67	43.2669		77452	3B	3B_IWA3000	457014285	86.68	67.4547		13216	2B	2B_IWB13216	640111395	135.59
12338	5A	5A_IWB12338	48968672	35.67	43.2669		77843	3B	3B_IWA3504	457976129	86.68	67.4547		68982	2B	2B_IWB68982	653914439	136.11	114.094
80018	5A	5A_IWA6412	52407776	35.67	15.6087		1028	3B	3B_IWB1028	457978535	86.68	67.4547		69070	2B	2B_IWB69070	653914722	136.11	108.453
59132	5A	5A_IWB59132	52409399	35.67	26.5058		77752	3B	3B_IWA3383	479893227	87.14	67.6697		62876	2B	2B_IWB62876	655007158	136.11	108.453
8504	5A	5A_IWB8504	54464713	35.67	26.5058		65234	3B	3B_IWB65234	501128517	88.06	68.8699		11092	2B	2B_IWB11092	655607486	136.11	108.038
76465	5A	5A_IWA1697	57373360	35.67	15.5807		65235	3B	3B_IWB65235	501123222	88.62	68.8699		75710	2B	2B_IWA543	657791579	136.11	109.526
81284	5A	5A_IWA8119	63373735	35.67	15.6087		10691	3B	3B_IWB10691	499175733	89.17	68.7099		10507	2B	2B_IWB10507	635075945	136.65	108.038
78059	5A	5A_IWA3776	63374790	35.67			80863	3B	3B_IWA7534	502637072	89.17	68.8699		8295	2B	2B_IWB8295	640489948	136.65
65695	5A	5A_IWB65695	64366482	35.67			57968	3B	3B_IWB57968	507510674	89.66	69.3725		4886	2B	2B_IWB4886	641943063	136.65	107.639
79362	5A	5A_IWA5431	64381482	35.67	15.5328		27586	3B	3B_IWB27586	511069524	89.66	69.5275		48482	2B	2B_IWB48482	643684581	136.65	108.453
36601	5A	5A_IWB36601	65980655	35.67	15.6087		49666	3B	3B_IWB49666	512425936	89.66	69.5275		28694	2B	2B_IWB28694	644146979	136.65	108.453
56715	5A	5A_IWB56715	66091536	35.67			5754	3B	3B_IWB5754	526124209	90.6	69.72		50645	2B	2B_IWB50645	411237207	138.07	107.486
77316	5A	5A_IWA2814	66091872	35.67	26.5058		11633	3B	3B_IWB11633	543718671	90.6	69.8075		76898	2B	2B_IWA2237	612686934	138.07	107.006
70992	5A	5A_IWB70992	66832544	35.67	26.5058		3526	3B	3B_IWB3526	543883622	90.6	69.72		48278	2B	2B_IWB48278	617142634	138.07	107.006
70988	5A	5A_IWB70988	66832820	35.67	15.6087		26579	3B	3B_IWB26579	543877389	91.1	69.72		52433	2B	2B_IWB52433	647108830	138.61	108.453
11195	5A	5A_IWB11195	68549689	35.67	26.5058		12538	3B	3B_IWB12538	559894494	92.02	71.3402		65526	2B	2B_IWB65526	647316286	138.61	108.453
77077	5A	5A_IWA2480	69101202	35.67	43.2669		27257	3B	3B_IWB27257	560116732	92.02	71.3402		45933	2B	2B_IWB45933	664219545	139.15	109.476
8649	5A	5A_IWB8649	69101292	35.67	19.8928		35937	3B	3B_IWB35937	561232503	92.02	71.0752		6031	2B	2B_IWB6031	664219711	139.15	109.476
76770	5A	5A_IWA2075	69845555	35.67	41.3472		27903	3B	3B_IWB27903	574699250	92.49	70.6977		62974	2B	2B_IWB62974	664219756	139.15	109.476
33374	5A	5A_IWB33374	69847411	35.67	41.3472		61850	3B	3B_IWB61850	578808991	92.97	73.353		48659	2B	2B_IWB48659	664219837	140.09	109.476
10478	5A	5A_IWB10478	70172446	35.67			22603	3B	3B_IWB22603	578813308	92.97	73.353		8421	2B	2B_IWB8421	673982517	141.02	109.526
58751	5A	5A_IWB58751	71502380	35.67	40.6004		62325	3B	3B_IWB62325	578813410	92.97	73.353		9247	2B	2B_IWB9247	686049366	141.94	110.873
65704	5A	5A_IWB65704	73834014	35.67	26.5058		4745	3B	3B_IWB4745	562731114	93.44			4443	2B	2B_IWB4443	686818449	141.94	109.245
33441	5A	5A_IWB33441	73834568	35.67	19.8928		43672	3B	3B_IWB43672	570254750	93.44			49323	2B	2B_IWB49323	683028761	142.46
8821	5A	5A_IWB8821	74106016	35.67			79506	3B	3B_IWA5626	572254195	93.44	71.3402		63108	2B	2B_IWB63108	683028879	142.46
42480	5A	5A_IWB42480	74106814	35.67	26.5058		57595	3B	3B_IWB57595	577576028	93.95	70.6977		36062	2B	2B_IWB36062	683029236	142.46	109.245
66123	5A	5A_IWB66123	74751370	35.67	26.5058		18505	3B	3B_IWB18505	592823120	95.9	73.353		7226	2B	2B_IWB7226	680573506	142.96	109.073
50975	5A	5A_IWB50975	74752246	35.67	15.6087		72105	3B	3B_IWB72105	590291959	97.26			78972	2B	2B_IWA4948	660156481	143.42	109.526
34888	5A	5A_IWB34888	76910470	35.67			71946	3B	3B_IWB71946	585607536	98.41	72.1179		76220	2B	2B_IWA1389	660461061	143.42	109.476
81339	5A	5A_IWA8201	78154569	35.67	19.8928		77685	3B	3B_IWA3304	586514003	98.41	72.0178		66389	2B	2B_IWB66389	660466198	143.42	109.526
1332	5A	5A_IWB1332	78159813	35.67	15.5807		35687	3B	3B_IWB35687	586514003	98.41	72.0178		47664	2B	2B_IWB47664	662684808	143.42	109.526
40822	5A	5A_IWB40822	80153859	35.67			78404	3B	3B_IWA4219	586734209	98.41	73.133		65372	2B	2B_IWB65372	663127896	143.42	114.094
77064	5A	5A_IWA2463	82868614	35.67	26.5058		40192	3B	3B_IWB40192	595288760	98.41	73.133		79066	2B	2B_IWA5064	694954105	143.42	123.597
77610	5A	5A_IWA3212	84117025	35.67	26.5058		38942	3B	3B_IWB38942	581964759	98.88	71.6503		68759	2B	2B_IWB68759	675340491	145.16	109.476
4738	5A	5A_IWB4738	86181443	35.67	15.6087		81523	3B	3B_IWA8520	581964832	98.88	73.353		28337	2B	2B_IWB28337	675345867	145.16	109.476
80819	5A	5A_IWA7473	86664254	35.67			24973	3B	3B_IWB24973	584695129	98.88			22281	2B	2B_IWB22281	676128399	145.16	109.526
19807	5A	5A_IWB19807	86873587	35.67	26.5058		3120	3B	3B_IWB3120	579452781	99.81	72.2379		102	2B	2B_IWB102	677218397	145.81
51776	5A	5A_IWB51776	87408717	35.67	12.8125		37911	3B	3B_IWB37911	581030944	99.81	72.2379		78033	2B	2B_IWA3741	683028635	145.81	109.245
79108	5A	5A_IWA5120	88028880	35.67	26.5058		11493	3B	3B_IWB11493	581645709	100.27	73.353		28807	2B	2B_IWB28807	687206986	145.81	109.245
64757	5A	5A_IWB64757	89705501	35.67	15.6087		54417	3B	3B_IWB54417	279755944	101.83			76474	2B	2B_IWA1708	690031652	146.4	109.245
34969	5A	5A_IWB34969	91119601	35.67	26.5058		60169	3B	3B_IWB60169	592609801	102.48	72.7329		52565	2B	2B_IWB52565	137286002	146.98
77616	5A	5A_IWA3220	92181248	35.67			53113	3B	3B_IWB53113	605449617	106.76	73.9156		27578	2B	2B_IWB27578	680573831	146.98	109.526
81023	5A	5A_IWA7759	92183382	35.67			79863	3B	3B_IWA6158	610177784	106.76	74.2257		31078	2B	2B_IWB31078	725736284	146.98
30569	5A	5A_IWB30569	92445640	35.67	26.5058		63113	3B	3B_IWB63113	611176652	106.76	74.2632		53687	2B	2B_IWB53687	725736284	146.98
81231	5A	5A_IWA8048	94088950	35.67	26.5058		35816	3B	3B_IWB35816	612101491	106.76	74.2632		31990	2B	2B_IWB31990	688433271	148.53
74359	5A	5A_IWB74359	97229367	35.67			30630	3B	3B_IWB30630	618151165	106.76			60720	2B	2B_IWB60720	689484800	148.53	123.645
39449	5A	5A_IWB39449	99417113	35.67			35102	3B	3B_IWB35102	618155198	106.76			43278	2B	2B_IWB43278	690588623	149.14	114.094
76281	5A	5A_IWA1466	104099059	35.67	101.161		71944	3B	3B_IWB71944	626090095	107.23	74.4332		30560	2B	2B_IWB30560	692461455	149.93	112.946
76280	5A	5A_IWA1465	104099348	35.67	100.643		50651	3B	3B_IWB50651	630158924	107.23	74.2632		64008	2B	2B_IWB64008	692461536	149.93	113.158
51084	5A	5A_IWB51084	104233283	35.67			78897	3B	3B_IWA4847	630307205	107.23	74.2632		18702	2B	2B_IWB18702	693368477	152.52
48289	5A	5A_IWB48289	104234712	35.67			80565	3B	3B_IWA7131	637091318	108.16	75.1908		11780	2B	2B_IWB11780	696677187	152.52	115.008
62285	5A	5A_IWB62285	104240625	35.67			6042	3B	3B_IWB6042	648742599	108.67			78306	2B	2B_IWA4095	696677326	152.52	114.094
19803	5A	5A_IWB19803	104625421	35.67			79148	3B	3B_IWA5165	637091479	109.17	74.9508		78307	2B	2B_IWA4096	696677568	152.52	113.857
9498	5A	5A_IWB9498	108589159	35.67			11875	3B	3B_IWB11875	648740075	109.17	73.453		76339	2B	2B_IWA1534	698212970	153.19	114.322
80923	5A	5A_IWA7624	109304799	35.67	16.8796		77793	3B	3B_IWA3439	649645334	109.17	74.9508		58736	2B	2B_IWB58736	704581450	153.29
31546	5A	5A_IWB31546	111623701	35.67	43.4447		13967	3B	3B_IWB13967	655632710	109.69			11887	2B	2B_IWB11887	704581630	153.81	125.857
79428	5A	5A_IWA5521	115097201	35.67	43.4447		76387	3B	3B_IWA1598	659787974	110.2	75.1908		26896	2B	2B_IWB26896	704721692	153.81
33425	5A	5A_IWB33425	117495535	35.67	43.2669		7178	3B	3B_IWB7178	659787974	110.2	75.1908		52991	2B	2B_IWB52991	698303834	153.82	114.187
77797	5A	5A_IWA3445	270830666	35.67	42.8555		57562	3B	3B_IWB57562	660790348	110.67	76.911		42341	2B	2B_IWB42341	698587811	153.82	114.187
76811	5A	5A_IWA2120	329828930	36.29	42.8555		77015	3B	3B_IWA2400	661345818	110.67	75.1908		24675	2B	2B_IWB24675	698964448	153.82	114.368
78786	5A	5A_IWA4710	331863915	36.29	42.8555		24076	3B	3B_IWB24076	668514510	111.69	77.2461		19972	2B	2B_IWB19972	699827018	153.82	114.568
20214	5A	5A_IWB20214	331864199	36.29	70.1018		12466	3B	3B_IWB12466	669443292	112.19	77.2286		69744	2B	2B_IWB69744	700741307	153.82	58.2402
61543	5A	5A_IWB61543	343064432	36.29	43.2669		12186	3B	3B_IWB12186	669948736	112.66	77.2286		11942	2B	2B_IWB11942	702714575	153.82	114.568
77068	5A	5A_IWA2467	344544730	36.29	43.2669		77488	3B	3B_IWA3046	671750873	112.66	75.1908		21867	2B	2B_IWB21867	703615652	153.82	123.645
30993	5A	5A_IWB30993	367600431	36.29	43.2669		78969	3B	3B_IWA4942	672104520	112.66	78.1612		38318	2B	2B_IWB38318	703976259	154.81	114.368
1040	5A	5A_IWB1040	437208847	40.35	47.9885		51803	3B	3B_IWB51803	672381164	112.66	75.1908		37344	2B	2B_IWB37344	706732357	155.97
8074	5A	5A_IWB8074	438149947	40.35	49.3886		40301	3B	3B_IWB40301	703909465	119.01			69373	2B	2B_IWB69373	708197437	156.5
79039	5A	5A_IWA5034	438266961	40.35	49.3746		8515	3B	3B_IWB8515	682909113	120.48	79.6814		69372	2B	2B_IWB69372	708197580	156.5
79037	5A	5A_IWA5032	438267359	40.35	49.2288		2290	3B	3B_IWB2290	678440613	120.97	78.8038		14614	2B	2B_IWB14614	711534453	157.8
46475	5A	5A_IWB46475	438469558	40.35	49.3886		50187	3B	3B_IWB50187	654316729	122.25	79.6814		31293	2B	2B_IWB31293	711718118	157.8
6809	5A	5A_IWB6809	439186551	41.42	49.3886		55343	3B	3B_IWB55343	758243788	123.77			44545	2B	2B_IWB44545	712599701	159.18	115.008
35587	5A	5A_IWB35587	442271807	42.06	49.0271		56059	3B	3B_IWB56059	708492676	125.14			36072	2B	2B_IWB36072	712600535	159.18	115.11
9612	5A	5A_IWB9612	442353026	42.06	49.0271		27908	3B	3B_IWB27908	14529645	126.25			74201	2B	2B_IWB74201	713675758	159.64	115.332
57612	5A	5A_IWB57612	444264987	42.62	49.2288		42477	3B	3B_IWB42477	58445982	126.25			36741	2B	2B_IWB36741	715030390	159.64
9838	5A	5A_IWB9838	444529828	42.62	47.9885		79753	3B	3B_IWA5985	692842760	126.25			28214	2B	2B_IWB28214	715717392	160.1
43473	5A	5A_IWB43473	444538518	42.62	47.9885		25238	3B	3B_IWB25238	700793625	126.25	106.556		41607	2B	2B_IWB41607	720479473	161.02	115.797
11637	5A	5A_IWB11637	450555688	44.54	51.1242		55101	3B	3B_IWB55101	707441536	126.84	80.9916		73441	2B	2B_IWB73441	720807493	161.02	115.797
21005	5A	5A_IWB21005	451483907	44.54	50.3812		80882	3B	3B_IWA7561	708240805	126.84	80.9916		9044	2B	2B_IWB9044	721922228	161.02	114.817
78804	5A	5A_IWA4734	451485452	44.54	50.3812		77660	3B	3B_IWA3273	710965438	127.3	80.9916		53685	2B	2B_IWB53685	722620506	161.48	115.797
43493	5A	5A_IWB43493	451886259	44.54	50.3812		56230	3B	3B_IWB56230	721061504	129.15	80.9916		73003	2B	2B_IWB73003	722620506	161.48
60657	5A	5A_IWB60657	456036709	45.82	51.1242		77976	3B	3B_IWA3669	723032152	129.15	80.9916		64930	2B	2B_IWB64930	738338799	162	79.5514
60841	5A	5A_IWB60841	456972955	45.82	50.5949		62411	3B	3B_IWB62411	731264620	133.31	82.5494		76133	2B	2B_IWA1272	322284021	163.2
65257	5A	5A_IWB65257	458203514	48.71	52.1069		76984	3B	3B_IWA2360	734428214	134.71			23232	2B	2B_IWB23232	748979803	164.26	130.291
39499	5A	5A_IWB39499	487844882	72.34	57.0841		27766	3B	3B_IWB27766	735125272	134.71	45.2451		9151	2B	2B_IWB9151	728365134	164.72
31570	5A	5A_IWB31570	488256042	72.34	57.0841		25761	3B	3B_IWB25761	735125430	134.71	84.4896		10194	2B	2B_IWB10194	725961805	165.22
11866	5A	5A_IWB11866	494870904	72.34	60.819		4056	3B	3B_IWB4056	735381383	134.71	84.4896		94	2B	2B_IWB94	703848731	165.76
27024	5A	5A_IWB27024	511876908	74.71	64.2104		77711	3B	3B_IWA3332	751574687	135.2	85.5173		23390	2B	2B_IWB23390	703848868	165.76
12854	5A	5A_IWB12854	525115978	75.96	66.5292		81236	3B	3B_IWA8054	751576109	135.2	85.5173		5495	2B	2B_IWB5495	742472996	166.37	80.3483
37548	5A	5A_IWB37548	526619471	75.96	66.9986		54923	3B	3B_IWB54923	737764203	135.66	86.975		23937	2B	2B_IWB23937	732606125	166.95
80569	5A	5A_IWA7135	527917865	75.96	66.9986		77974	3B	3B_IWA3667	737764203	135.66	86.975		1992	2B	2B_IWB1992	725961293	167.45	82.8209
8838	5A	5A_IWB8838	529807605	75.96	67.0844		35001	3B	3B_IWB35001	737764637	135.66	86.975		42842	2B	2B_IWB42842	730851132	167.45
72977	5A	5A_IWB72977	536677389	80.39	70.3001		2844	3B	3B_IWB2844	738318579	136.12			11239	2B	2B_IWB11239	731481384	167.45
10594	5A	5A_IWB10594	540611588	82.08			9227	3B	3B_IWB9227	738377396	136.12	123.006		9355	2B	2B_IWB9355	731536454	167.45
76989	5A	5A_IWA2365	547646665	88.37	73.971		25571	3B	3B_IWB25571	738591266	136.12	86.975		55233	2B	2B_IWB55233	731891322	167.45
7095	5A	5A_IWB7095	548625766	89.09	76.2899		73646	3B	3B_IWB73646	736672399	137.13	84.4896		69674	2B	2B_IWB69674	741444830	167.45
7726	5A	5A_IWB7726	548626293	89.09	76.3238		70218	3B	3B_IWB70218	738748940	137.64	85.5173		4394	2B	2B_IWB4394	742524112	167.45
20138	5A	5A_IWB20138	549356135	90.21	77.0189		67102	3B	3B_IWB67102	738753252	137.64	87.4025		21780	2B	2B_IWB21780	743690346	167.45
6371	5A	5A_IWB6371	552515212	90.85	76.8092		73061	3B	3B_IWB73061	738754467	137.64	86.975		36402	2B	2B_IWB36402	743691983	167.45
79539	5A	5A_IWA5668	556684588	92.14	81.1293		31324	3B	3B_IWB31324	744215372	139.99	128.641		30597	2B	2B_IWB30597	743746363	167.45	82.8209
1462	5A	5A_IWB1462	556684856	92.14	79.4376		34252	3B	3B_IWB34252	696241468	143.2			44403	2B	2B_IWB44403	748814792	168.03
54382	5A	5A_IWB54382	558246539	92.73	80.4322		23127	3B	3B_IWB23127	752091099	145.16	91.5181		66416	2B	2B_IWB66416	742079993	168.72
63810	5A	5A_IWB63810	559071692	95.57			59536	3B	3B_IWB59536	607383675	145.81	91.4381		24602	2B	2B_IWB24602	714132936	170.04	115.332
10966	5A	5A_IWB10966	559505920	95.57	81.9581		40768	3B	3B_IWB40768	672021081	145.81	109.526		8450	2B	2B_IWB8450	714779769	170.04	114.911
35938	5A	5A_IWB35938	561173979	95.57	82.2797		17358	3B	3B_IWB17358	698740213	146.53	91.5181		75246	2B	2B_IWB75246	715315025	170.04	115.728
71983	5A	5A_IWB71983	561973006	96.27	82.7211		8129	3B	3B_IWB8129	750138011	146.53	129.136		37873	2B	2B_IWB37873	716782453	170.04
71641	5A	5A_IWB71641	563841535	96.27	82.7211		72807	3B	3B_IWB72807	750357855	146.53	95.3887		24230	2B	2B_IWB24230	717474744	170.04	115.728
59853	5A	5A_IWB59853	564175945	97.05	82.7211		72808	3B	3B_IWB72808	750357915	146.53			55708	2B	2B_IWB55708	722330128	170.43
63597	5A	5A_IWB63597	564595426	98.64	82.7211		1239	3B	3B_IWB1239	736711821	147.86	85.5173		19785	2B	2B_IWB19785	723333630	170.91	116.819
8003	5A	5A_IWB8003	565540546	98.64	82.7211		67700	3B	3B_IWB67700	736712253	147.86	123.006		80206	2B	2B_IWA6670	725137277	170.91	148.431
80235	5A	5A_IWA6706	565550180	98.64	82.7211		30542	3B	3B_IWB30542	739170407	149.16			8713	2B	2B_IWB8713	726126845	170.91
72737	5A	5A_IWB72737	567526989	102.49	84.1272		46442	3B	3B_IWB46442	746875398	150.56			7207	2B	2B_IWB7207	726547785	170.91
47196	5A	5A_IWB47196	567917814	103.2	84.5806		46441	3B	3B_IWB46441	746875317	151.28			41399	2B	2B_IWB41399	729768050	170.91
25393	5A	5A_IWB25393	568157020	103.2	88.0259		49715	3B	3B_IWB49715	744578572	151.88	107.089		49826	2B	2B_IWB49826	730190691	170.91
81076	5A	5A_IWA7833	568269114	103.2			50512	3B	3B_IWB50512	744418011	152.38	88.0751		28215	2B	2B_IWB28215	731312452	170.91	82.8209
12145	5A	5A_IWB12145	569452685	103.2	86.2143		65244	3B	3B_IWB65244	739660832	152.94	87.7701		43924	2B	2B_IWB43924	733395020	170.91	85.219
36772	5A	5A_IWB36772	569463752	103.2	93.436		13376	3B	3B_IWB13376	742106753	153.49	88.0751		59956	2B	2B_IWB59956	748425347	172.53	129.081
78534	5A	5A_IWA4392	569546260	103.2			45104	3B	3B_IWB45104	744730504	153.96	90.873		64697	2B	2B_IWB64697	738681209	172.57
64483	5A	5A_IWB64483	569655859	103.2	84.1272		47344	3B	3B_IWB47344	745220374	153.96	90.6255		34749	2B	2B_IWB34749	740315587	172.57	119.613
43526	5A	5A_IWB43526	570187361	105.02	86.3142		50524	3B	3B_IWB50524	745714161	153.96	88.0751		81463	2B	2B_IWA8406	740805225	172.57	119.613
35586	5A	5A_IWB35586	570502397	105.57	84.1272		38921	3B	3B_IWB38921	747712627	153.96	90.873		23084	2B	2B_IWB23084	741860392	172.57
73200	5A	5A_IWB73200	570934010	105.57	86.3581		27126	3B	3B_IWB27126	749140341	153.96	90.873		34617	2B	2B_IWB34617	748444187	173.83	134.46
10766	5A	5A_IWB10766	571466114	105.57			1663	3B	3B_IWB1663	493321140	154.43	134.46		11174	2B	2B_IWB11174	753974237	173.83	134.46
52187	5A	5A_IWB52187	571787892	105.57	86.5878		8128	3B	3B_IWB8128	750138234	154.43			25863	2B	2B_IWB25863	754864431	173.83	134.46
76720	5A	5A_IWA2014	572830264	105.57	88.0259		23680	3B	3B_IWB23680	756708500	155.36	97.6165		32437	2B	2B_IWB32437	754665903	174.36	76.5687
70567	5A	5A_IWB70567	572840902	105.57	84.1272		30522	3B	3B_IWB30522	760137055	156.59	130.077		7265	2B	2B_IWB7265	745719282	175.24	129.081
38386	5A	5A_IWB38386	573042833	105.57	84.1272		65493	3B	3B_IWB65493	761005253	157.34			12574	2B	2B_IWB12574	755012102	175.24	132.473
21417	5A	5A_IWB21417	574489775	106.39	88.0259		9959	3B	3B_IWB9959	516035737	158.19	71.6438		9024	2B	2B_IWB9024	747144155	175.72	130.618
80481	5A	5A_IWA7025	574748792	106.39	88.0259		48681	3B	3B_IWB48681	755315615	158.19			26300	2B	2B_IWB26300	752485079	175.72	130.618
10862	5A	5A_IWB10862	578058189	107.69	88.7049		9095	3B	3B_IWB9095	760578628	158.19	99.4368		36802	2B	2B_IWB36802	748471464	175.95
73710	5A	5A_IWB73710	578063930	107.69	88.7049		76508	3B	3B_IWA1744	760709297	158.19			7767	2B	2B_IWB7767	750013548	178.22	130.618
33488	5A	5A_IWB33488	580465717	107.69	89.0165		44447	3B	3B_IWB44447	761579688	158.19	99.6943		80550	2B	2B_IWA7112	751261547	178.22	130.618
78590	5A	5A_IWA4469	580935831	107.69	89.0165		45763	3B	3B_IWB45763	761580366	158.19	99.8868		32354	2B	2B_IWB32354	751532660	178.95	130.618
9564	5A	5A_IWB9564	581479138	107.69	89.0165		28603	3B	3B_IWB28603	761853543	158.19	181.123		12817	2B	2B_IWB12817	751541301	179.77	130.618
25895	5A	5A_IWB25895	580948088	108.3	89.0165		68475	3B	3B_IWB68475	763235249	158.81	144.611		38059	2B	2B_IWB38059	751580675	180.43	130.618
72425	5A	5A_IWB72425	584713871	109.4	89.5618		58482	3B	3B_IWB58482	764697364	158.81	101.83		26301	2B	2B_IWB26301	752485222	181.03	130.618
9678	5A	5A_IWB9678	585080430	109.4	89.9632		10030	3B	3B_IWB10030	769916045	167.68	105.355		36334	2B	2B_IWB36334	763862057	183.44	134.46
77737	5A	5A_IWA3363	585403170	110.02	89.9572		11935	3B	3B_IWB11935	772397511	169.12	106.728		65621	2B	2B_IWB65621	765071508	189.53
77736	5A	5A_IWA3362	585403272	110.02	89.5618		45366	3B	3B_IWB45366	771941399	169.68	105.265		29809	2B	2B_IWB29809	765071660	189.53	134.46
28837	5A	5A_IWB28837	585412855	110.02	89.5618		44858	3B	3B_IWB44858	574332330	170.27			42028	2B	2B_IWB42028	765071723	189.53	134.46
79251	5A	5A_IWA5287	585609239	110.02	91.3034		7294	3B	3B_IWB7294	772399643	170.27	106.728		59281	2B	2B_IWB59281	765072016	189.53	134.46
18271	5A	5A_IWB18271	586724439	110.02	139.358		53154	3B	3B_IWB53154	716069442	171.31	110.153		61416	2B	2B_IWB61416	765072223	189.53
78540	5A	5A_IWA4398	586725629	110.02	90.5444		61285	3B	3B_IWB61285	775830199	171.31	110.153		56526	2B	2B_IWB56526	765279313	189.53	134.46
35961	5A	5A_IWB35961	588377241	110.02	90.5444		7540	3B	3B_IWB7540	776032097	171.31	110.153		6130	2B	2B_IWB6130	767651618	189.79	134.46
75334	5A	5A_IWA1	588550278	110.02	90.5444		2509	3B	3B_IWB2509	775827555	172.35	110.153		48440	2B	2B_IWB48440	769080301	189.79	139.48
75749	5A	5A_IWA590	588737306	110.02			58613	3B	3B_IWB58613	535438154	181.9	64.8216		45840	2B	2B_IWB45840	159186325	190.46
78578	5A	5A_IWA4447	591155558	110.78	91.9944		34424	3B	3B_IWB34424	782664445	182.5	120.015		70816	2B	2B_IWB70816	159183561	191.59	62.5805
11585	5A	5A_IWB11585	591463499	110.78	92.6036		75968	3B	3B_IWA939	783466086	184.04	119.377		10706	2B	2B_IWB10706	765897855	192.11
63075	5A	5A_IWB63075	591487483	110.78	91.9944		81240	3B	3B_IWA8058	783472149	184.6	119.902		79558	2B	2B_IWA5697	770572419	193.97	80.7744
76888	5A	5A_IWA2223	592276655	110.78	92.5637		9115	3B	3B_IWB9115	81597720	186.34	122.518		36009	2B	2B_IWB36009	769307025	197.34	185.666
80655	5A	5A_IWA7255	592280065	110.78	92.3539		32587	3B	3B_IWB32587	787937139	186.34	122.518		5839	2B	2B_IWB5839	769307025	197.34	185.666
24094	5A	5A_IWB24094	593120667	110.78	92.6036		3779	3B	3B_IWB3779	792495124	186.34	122.518		34394	2B	2B_IWB34394	769949884	198.35	140.481
9808	5A	5A_IWB9808_1	593332352	110.78	92.6036		10522	3B	3B_IWB10522	796310444	196.97			9088	2B	2B_IWB9088	770070240	198.35	136.97
78146	5A	5A_IWA3887	593334252	110.78	92.6036		14554	3B	3B_IWB14554	798164440	196.97	125.365		68997	2B	2B_IWB68997	772789808	201.06	142.992
9808	5A	5A_IWB9808_2	593332352	111.35	92.6036		72945	3B	3B_IWB72945	798395625	197.91	135.915		20875	2B	2B_IWB20875	773142143	201.06	142.992
48776	5A	5A_IWB48776	578086641	111.89			23324	3B	3B_IWB23324	798307472	200.77	135.915		67751	2B	2B_IWB67751	684076272	202.05
24095	5A	5A_IWB24095	593121193	111.89	92.6036		65503	3B	3B_IWB65503	799207124	206.68	134.834		69000	2B	2B_IWB69000	772790041	203.04	142.992
78444	5A	5A_IWA4276	594576820	112.68	93.2288		47235	3B	3B_IWB47235	800171854	206.68	134.834		27473	2B	2B_IWB27473	774958099	203.51	142.764
8258	5A	5A_IWB8258	594960175	112.68	93.2288		27627	3B	3B_IWB27627	823031762	208.28	132.094		63210	2B	2B_IWB63210	775053184	203.98	144.164
64235	5A	5A_IWB64235	595372494	113.25	93.2288		27815	3B	3B_IWB27815	808975647	208.79	136.36		9919	2B	2B_IWB9919	775337393	203.98	144.136
69752	5A	5A_IWB69752	596561129	114.98	94.1036		26470	3B	3B_IWB26470	807288152	209.88			71	2B	2B_IWB71	775371493	203.98	144.164
27060	5A	5A_IWB27060	597660551	115.59	94.497		1595	3B	3B_IWB1595	806115541	210.42	136.312		71962	2B	2B_IWB71962	775172659	204.55
1041	5A	5A_IWB1041	598666304	117.9	96.7819		53715	3B	3B_IWB53715	732668232	211.39	137.2		76190	2B	2B_IWA1348	760565827	205.41	151.292
57538	5A	5A_IWB57538	608624574	125.48	98.4356		1858	3B	3B_IWB1858	810329118	211.39	137.2		40456	2B	2B_IWB40456	775169349	205.41	145.128
75811	5A	5A_IWA674	609872838	125.48	98.4356		53038	3B	3B_IWB53038	810335989	211.39	137.2		30421	2B	2B_IWB30421	775368259	206.07	144.164
9165	5A	5A_IWB9165	610182016	125.48	98.4356		66222	3B	3B_IWB66222	810953000	212.62	137.845		41532	2B	2B_IWB41532	776699362	207.44	93.4114
7242	5A	5A_IWB7242	610212890	125.48	98.4356		81501	3B	3B_IWA8479	737676426	214.47	139.618		47814	2B	2B_IWB47814	777143525	208.96
27770	5A	5A_IWB27770	613703510	127.58			72177	3B	3B_IWB72177	815391105	214.47	139.618		73759	2B	2B_IWB73759	777384171	208.96
77935	5A	5A_IWA3623	616522499	128.29	98.901		25612	3B	3B_IWB25612	815872089	214.47	139.618		11535	2B	2B_IWB11535	779673663	208.96	151.298
57659	5A	5A_IWB57659	617347931	129	99.5641		59724	3B	3B_IWB59724	814115661	214.96	139.618		31342	2B	2B_IWB31342	779251503	210.11	145.128
39570	5A	5A_IWB39570	617355981	129	98.901		36567	3B	3B_IWB36567	739147447	215.52	139.618		10610	2B	2B_IWB10610	777301570	210.36	151.292
912	5A	5A_IWB912	619682348	129	99.8817		8949	3B	3B_IWB8949	738325924	216.08	139.618		77818	2B	2B_IWA3474	777514133	210.82	145.536
35863	5A	5A_IWB35863	619684883	129	98.5954		28802	3B	3B_IWB28802	780547059	216.08	139.618		1796	2B	2B_IWB1796	778849230	211.28	145.751
35862	5A	5A_IWB35862	619685355	129	99.65		46870	3B	3B_IWB46870	816264980	216.61	139.618		29325	2B	2B_IWB29325	779254633	211.28	145.751
76844	5A	5A_IWA2163	633843873	136.23	103.637		52809	3B	3B_IWB52809	463383764	223	28.5844		4319	2B	2B_IWB4319	779344647	211.28	145.751
76666	5A	5A_IWA1942	653860072	148.52	110.863		58481	3B	3B_IWB58481	828420840	223.54	144.743		66206	2B	2B_IWB66206	779341759	212.2	145.751
77347	5A	5A_IWA2857	657057570	150.24	111.2		58799	3B	3B_IWB58799	28606569	224.47	153.53		45240	2B	2B_IWB45240	779833219	212.2	145.988
76804	5A	5A_IWA2113	657061990	150.24	111.2		59625	3B	3B_IWB59625	675900786	224.96	144.743		501	2B	2B_IWB501	779855072	213.05	148.112
80467	5A	5A_IWA7009	657202023	151.43	111.2		10310	3B	3B_IWB10310	826082809	224.96	144.743		7761	2B	2B_IWB7761	780779198	213.05	146.796
59439	5A	5A_IWB59439	657381432	151.43	111.286		50139	3B	3B_IWB50139	826084022	224.96	144.383		78218	2B	2B_IWA3982	780782566	213.05
47106	5A	5A_IWB47106	667102875	162.98			10667	3B	3B_IWB10667	829197946	224.96	144.743		7818	2B	2B_IWB7818	783534577	213.05	153.43
79716	5A	5A_IWA5929	670407113	162.98	79.7381		9011	3B	3B_IWB9011	824047976	225.47	143.293		75860	2B	2B_IWA746	783559319	213.05	147.47
50494	5A	5A_IWB50494	671444797	165.34	119.81		69985	3B	3B_IWB69985	172657451	225.96	15.5807		3062	2B	2B_IWB3062	779880521	213.59	146.163
8656	5A	5A_IWB8656	671551588	165.34	117.671		12422	3B	3B_IWB12422	822555178	225.96			6618	2B	2B_IWB6618	780782797	214.18	146.796
9669	5A	5A_IWB9669	672574128	165.96	120.138		46567	3B	3B_IWB46567	822972117	225.96	143.293		74399	2B	2B_IWB74399	780821759	214.69	146.016
58342	5A	5A_IWB58342	673558347	166.58			56326	3D	3D_IWB56326	1255437	0	11.8367		35566	2B	2B_IWB35566	782832934	215.15	151.704
76442	5A	5A_IWA1670	673708132	167.13	117.671		56327	3D	3D_IWB56327	1255507	0	5.85834		77643	2B	2B_IWA3252	785138741	216.99	154.473
80586	5A	5A_IWA7162	673776302	167.13	125.199		67390	3D	3D_IWB67390	927527	5.41	4.56078		8157	2B	2B_IWB8157	781584299	218.81	152.59
77328	5A	5A_IWA2828	673776396	167.13	125.199		24197	3D	3D_IWB24197	1346923	5.41	0		55543	2B	2B_IWB55543	782152561	218.81	103.328
39604	5A	5A_IWB39604	673777738	167.13			24559	3D	3D_IWB24559	4195925	5.97	6.05701		7106	2B	2B_IWB7106	783226978	218.81	153.176
14661	5A	5A_IWB14661	677845186	169.09	125.199		72100	3D	3D_IWB72100	3298894	14.42	13.5089		79087	2B	2B_IWA5093_1	783228849	218.81	153.176
27042	5A	5A_IWB27042	678270304	169.69	125.199		23511	3D	3D_IWB23511	774409	17.43	4.00484		79087	2B	2B_IWA5093_2	783228849	218.81	153.176
77514	5A	5A_IWA3083	680209898	170.3	127.626		34643	3D	3D_IWB34643	774577	17.43	4.00484		79087	2B	2B_IWA5093_3	783228849	218.81	153.176
4543	5A	5A_IWB4543	680209988	170.3	127.626		22742	3D	3D_IWB22742	4395121	17.43	5.09613		42506	2B	2B_IWB42506	784619262	218.81	30.1472
10802	5A	5A_IWB10802	679137178	170.97	125.199		5600	3D	3D_IWB5600	4966610	17.43	14.1045		7580	2B	2B_IWB7580	786262838	220.44	155.144
56756	5A	5A_IWB56756	679489743	170.97	125.682		4872	3D	3D_IWB4872	35322943	17.43	14.1045		70778	2B	2B_IWB70778	787286602	220.92	155.409
47624	5A	5A_IWB47624	679657976	170.97	125.682		50719	3D	3D_IWB50719	32268716	44.5	68.656		48388	2B	2B_IWB48388	785890263	221.19	153.491
80828	5A	5A_IWA7491	679663686	170.97	125.682		61987	3D	3D_IWB61987	32268903	44.5	93.779		28160	2B	2B_IWB28160	786105100	221.19
77335	5A	5A_IWA2839	679664943	170.97	125.682		20976	3D	3D_IWB20976	32269103	44.5			27274	2B	2B_IWB27274	786230010	221.19	155.144
7014	5A	5A_IWB7014	679740028	170.97	124.588		30065	3D	3D_IWB30065	32269276	44.5			31257	2B	2B_IWB31257	787816511	221.19	155.409
48691	5A	5A_IWB48691	688142494	177.06	131.425		40102	3D	3D_IWB40102	32270229	44.5	68.656		12415	2B	2B_IWB12415	787819631	221.19	157.214
7449	5A	5A_IWB7449	690548798	180.77	137.976		27117	3D	3D_IWB27117	32270533	44.5	76.5277		12022	2B	2B_IWB12022	787956682	221.19
9620	5A	5A_IWB9620	691027878	180.77	137.976		80960	3D	3D_IWA7672	80947367	56.04			14028	2B	2B_IWB14028	611282912	221.33	155.409
74802	5A	5A_IWB74802	691669507	180.77			34605	3D	3D_IWB34605	86353110	57.53	74.4206		59509	2B	2B_IWB59509	695850946	223.03	60.6243
24570	5A	5A_IWB24570	698212838	181.5	139.753		51438	3D	3D_IWB51438	137635228	58.03			32232	2B	2B_IWB32232	772436203	224.2	157.807
60850	5A	5A_IWB60850	698510016	182.91	141.749		79598	3D	3D_IWA5750	159425959	59.28	42.2206		73791	2B	2B_IWB73791	772373193	224.79	103.328
41518	5A	5A_IWB41518	702166151	184.08	144.137		1034	3D	3D_IWB1034	294350301	60.51	107.87		56269	2B	2B_IWB56269	769496900	224.99
26315	5A	5A_IWB26315	702166708	184.08	144.137		18547	3D	3D_IWB18547	274499494	61.14	101.085		28826	2B	2B_IWB28826	789601379	224.99
10235	5A	5A_IWB10235	702461365	184.08	144.263		81325	3D	3D_IWA8179	277548406	61.14	107.87		63562	2B	2B_IWB63562	789601873	224.99
6627	5A	5A_IWB6627	706501201	186.18			52061	3D	3D_IWB52061	340684070	64.31	112.568		22474	2B	2B_IWB22474	790753782	224.99	99.1944
75087	5A	5A_IWB75087	706242982	186.92	148.304		50128	3D	3D_IWB50128	351129692	66.09	66.9875		7606	2B	2B_IWB7606	793151178	224.99	159.656
77138	5A	5A_IWA2558	708418314	186.92	147.259		34348	3D	3D_IWB34348	374356675	67.86	113.096		7323	2B	2B_IWB7323	787956768	225.34
75566	5B	5B_IWA332	20832543	0	25.0884		34976	3D	3D_IWB34976	524870464	88.08	121.343		4120	2B	2B_IWB4120	778414518	225.84
33515	5B	5B_IWB33515	21184881	0	20.2342		6799	3D	3D_IWB6799	536437911	88.56			32334	2B	2B_IWB32334	787965115	225.84
51177	5B	5B_IWB51177	24918121	1.1	27.6603		10689	3D	3D_IWB10689	609923586	109.07	143.007		9733	2B	2B_IWB9733	684759512	227.78	161.415
77477	5B	5B_IWA3033	27830630	1.73	33.0198		38954	3D	3D_IWB38954	610348446	109.07	143.293		28692	2B	2B_IWB28692	789608880	227.78	161.415
22465	5B	5B_IWB22465	38157656	4.86	32.7301		11519	3D	3D_IWB11519	613621949	109.55	142.318		13362	2B	2B_IWB13362	789965438	228.71	161.415
8792	5B	5B_IWB8792	41275987	4.86	37.1787		40719	3D	3D_IWB40719	613695464	109.55			46300	2B	2B_IWB46300	790228772	228.71	158.699
35827	5B	5B_IWB35827	55492409	10.17	38.4952		79799	3D	3D_IWA6058	613695464	109.55			7605	2B	2B_IWB7605	793151450	229.27	163.133
46117	5B	5B_IWB46117	59158340	10.82	43.5618		40720	3D	3D_IWB40720	613695818	109.55			75990	2B	2B_IWA988	790749114	229.84	161.415
48839	5B	5B_IWB48839	116836931	12.92	15.5328		47098	3D	3D_IWB47098	614366048	109.55			8698	2B	2B_IWB8698	793148351	229.84	161.415
79081	5B	5B_IWA5086	121554580	12.92	43.5618		72981	3D	3D_IWB72981	613390031	110.12	143.007		39806	2B	2B_IWB39806	790754213	230.39	119.847
7927	5B	5B_IWB7927	122100231	12.92	43.5618		53496	3D	3D_IWB53496	613695698	110.12	143.007		55640	2B	2B_IWB55640	762291307	233.84	98.5949
10259	5B	5B_IWB10259	123758055	12.92	40.565		46568	3D	3D_IWB46568	613737190	110.12	143.007		23407	2B	2B_IWB23407	762508086	235.6
65468	5B	5B_IWB65468	128470399	12.92	15.5428		60981	3D	3D_IWB60981	614675595	110.12	143.007		34261	2B	2B_IWB34261	795064134	237.34	154.76
34500	5B	5B_IWB34500	129250452	12.92	15.5328		60980	3D	3D_IWB60980	614675640	110.12	143.007		6763	2B	2B_IWB6763	795064176	237.34	99.1944
80046	5B	5B_IWA6451	130396126	12.92	40.565		54838	3D	3D_IWB54838	614676903	110.12	41.3259		44576	2B	2B_IWB44576	794049870	237.92
80645	5B	5B_IWA7244	130914061	12.92	40.565		16434	3D	3D_IWB16434	608065980	110.67	143.007		25551	2B	2B_IWB25551	691597447	238.49	58.3331
75449	5B	5B_IWA166	132285049	12.92	43.5618		52398	3D	3D_IWB52398	606880424	111.15	148.484		13583	2B	2B_IWB13583	740007032	238.49	67.1406
68020	5B	5B_IWB68020	134139145	12.92	11.5922		23073	3D	3D_IWB23073	609086047	112.26	143.007		9184	2B	2B_IWB9184	774831059	238.49	181.918
79064	5B	5B_IWA5062	136046183	12.92	40.565		53178	3D	3D_IWB53178	609087828	112.26	143.007		65897	2B	2B_IWB65897	793578005	238.49
38571	5B	5B_IWB38571	137284971	12.92	98.2989		27567	3D	3D_IWB27567	609109849	112.26			6046	2B	2B_IWB6046	794500852	238.49	156.09
35895	5B	5B_IWB35895	138346617	12.92	43.5618		67246	3D	3D_IWB67246	609338005	114.37	175.255		3970	2B	2B_IWB3970	794501126	238.49	181.918
79102	5B	5B_IWA5113	139166863	12.92	15.7046		28840	3D	3D_IWB28840	609374599	114.37	143.007		42141	2B	2B_IWB42141	794501959	238.49	98.5949
76641	5B	5B_IWA1915	141148746	12.92			45892	3D	3D_IWB45892	611918433	114.37	144.743		60399	2B	2B_IWB60399	795066076	238.95
8358	5B	5B_IWB8358	141902577	12.92	43.5618		4163	3D	3D_IWB4163	600641187	115.66	149.003		12598	2B	2B_IWB12598	796801998	239.41	173.352
79426	5B	5B_IWA5519	142664884	12.92	43.5618		2611	3D	3D_IWB2611	604360566	115.66	156.062		58090	2B	2B_IWB58090	784191216	240.79	169.183
48001	5B	5B_IWB48001	143720792	12.92	40.565		29061	3D	3D_IWB29061	604399008	115.66	143.007		23770	2B	2B_IWB23770	797590150	240.79	173.352
38461	5B	5B_IWB38461	149002540	12.92	43.5618		78853	3D	3D_IWA4792	604400161	115.66			46022	2B	2B_IWB46022	800031434	241.74	169.304
14620	5B	5B_IWB14620	155281766	12.92	43.5618		77585	3D	3D_IWA3186	604669829	115.66			44158	2B	2B_IWB44158	787738787	243.32	76.5687
66057	5B	5B_IWB66057	166704924	12.92	43.5618		58811	3D	3D_IWB58811	609626480	116.26	143.007		41947	2D	2D_IWB41947	11005374	0	151.992
77251	5B	5B_IWA2715	170640959	12.92	43.5618		58812	3D	3D_IWB58812	609626601	116.26	143.293		12342	2D	2D_IWB12342	10905560	1.8	25.9702
79583	5B	5B_IWA5730	177192719	12.92	40.565		15087	3D	3D_IWB15087	609922546	116.26	143.007		19123	2D	2D_IWB19123	9579073	2.28	2.28269
51611	5B	5B_IWB51611	181574887	12.92	43.5618		24251	3D	3D_IWB24251	613655448	116.26	138.069		46392	2D	2D_IWB46392	8717238	3.77
3389	5B	5B_IWB3389	188800592	12.92	43.5618		27498	3D	3D_IWB27498	613700075	116.26	142.318		79600	2D	2D_IWA5752	8717330	4.78	48.443
34924	5B	5B_IWB34924	194190493	12.92	40.565		58760	3D	3D_IWB58760	613700533	116.26	142.318		13606	2D	2D_IWB13606	11039965	6.33	25.9702
20182	5B	5B_IWB20182	195147206	12.92	43.5618		6953	3D	3D_IWB6953	593087842	117.94	166.192		64927	2D	2D_IWB64927	11040294	7.36	25.9702
9094	5B	5B_IWB9094	232214885	12.92	40.565		1974	3D	3D_IWB1974	476455285	120.22			12365	2D	2D_IWB12365	11094480	7.36
74739	5B	5B_IWB74739	234304240	12.92	43.5618		62386	3D	3D_IWB62386	554036503	120.22			12364	2D	2D_IWB12364	11094608	7.36
60973	5B	5B_IWB60973	236258687	12.92	40.565		74840	3D	3D_IWB74840	593222536	120.22			9987	2D	2D_IWB9987	11242736	8.37
80450	5B	5B_IWA6987	243137805	12.92	43.5618		50423	3D	3D_IWB50423	609585614	120.22	139.618		25303	2D	2D_IWB25303	11403957	8.87
79348	5B	5B_IWA5412	243916711	12.92	43.5618		44062	3D	3D_IWB44062	612903864	120.22	143.007		7422	2D	2D_IWB7422	11477071	8.87
49069	5B	5B_IWB49069	249582175	12.92	43.5618		23464	3D	3D_IWB23464	615318548	120.22	35.1104		32230	2D	2D_IWB32230	12331976	9.8	6.75124
55813	5B	5B_IWB55813	273139244	12.92	43.5618		28522	3D	3D_IWB28522	612890046	120.97	144.743		57275	2D	2D_IWB57275	12331605	10.29	25.9702
39198	5B	5B_IWB39198	278884031	12.92	41.5886		40708	3D	3D_IWB40708	609625283	121.62	142.143		76553	2D	2D_IWA1799	21950734	12.59	3.03489
35964	5B	5B_IWB35964	279097538	12.92	41.5886		39608	3D	3D_IWB39608	360571411	122.19	143.007		9992	2D	2D_IWB9992	37671654	15.23
52230	5B	5B_IWB52230	288305555	12.92	45.3902		42974	3D	3D_IWB42974	448217826	122.19			35430	2D	2D_IWB35430	13408438	17.15	25.9702
6012	5B	5B_IWB6012	289567049	12.92	45.3902		69421	3D	3D_IWB69421	606080200	122.19	139.618		45152	2D	2D_IWB45152	11197914	17.62	27.1982
38348	5B	5B_IWB38348	316154418	12.92	40.5457		59959	3D	3D_IWB59959	609214735	122.19			25572	2D	2D_IWB25572	11896958	17.62	0.374793
78828	5B	5B_IWA4759	316706078	12.92	40.5457		29396	3D	3D_IWB29396	611251806	122.19	143.007		51315	2D	2D_IWB51315	19395372	18.35	6.75124
11753	5B	5B_IWB11753	318393565	12.92	40.5457		69422	3D	3D_IWB69422	606079641	122.74	143.007		2494	2D	2D_IWB2494	22317761	18.88	25.9702
74394	5B	5B_IWB74394	319652758	12.92			12502	3D	3D_IWB12502	579756967	123.28			79613	2D	2D_IWA5772	22724753	18.88	6.75124
34529	5B	5B_IWB34529	321217900	12.92	45.3966		11439	3D	3D_IWB11439	595073610	123.8	134.834		32369	2D	2D_IWB32369	12689645	19.39
37798	5B	5B_IWB37798	321416566	12.92	40.5457		926	3D	3D_IWB926	609075858	124.37	102.919		12110	2D	2D_IWB12110	12696269	19.39
13269	5B	5B_IWB13269	322553428	12.92	45.3966		7224	3D	3D_IWB7224	593339925	126.52	125.365		7339	2D	2D_IWB7339	12786080	19.39
24395	5B	5B_IWB24395	325088325	12.92	43.3075		14104	3D	3D_IWB14104	591877200	127.21			6976	2D	2D_IWB6976	13679322	19.39
23225	5B	5B_IWB23225	333718647	12.92			55121	3D	3D_IWB55121	609123538	127.21	143.007		6542	2D	2D_IWB6542	11459863	19.43	25.9702
34568	5B	5B_IWB34568	335947780	12.92			52216	3D	3D_IWB52216	451200457	127.8	71.4286		11934	2D	2D_IWB11934	13680056	19.43
26156	5B	5B_IWB26156	339535090	12.92			72192	3D	3D_IWB72192	613389349	127.8	143.007		8391	2D	2D_IWB8391	13682541	19.43	48.443
66093	5B	5B_IWB66093	353039065	12.92	49.0083		68581	3D	3D_IWB68581	529807478	128.4	143.007		61256	2D	2D_IWB61256	15623703	19.43	47.2174
5805	5B	5B_IWB5805	354292020	12.92	49.0083		72414	3D	3D_IWB72414	9053137	128.99	143.007		72027	2D	2D_IWB72027	18263284	19.43	27.1982
78608	5B	5B_IWA4494	354987905	12.92	49.0083		33681	3D	3D_IWB33681	536077437	132.02			76389	2D	2D_IWA1601	13909836	19.86	5.90966
78553	5B	5B_IWA4414	366008983	12.92	46.4042		37183	4A	4A_IWB37183	2791017	0	8.60677		61002	2D	2D_IWB61002	13989221	19.86	6.93743
78354	5B	5B_IWA4158	368503720	12.92	49.0083		10748	4A	4A_IWB10748	2989817	0.93	8.60677		65267	2D	2D_IWB65267	13906603	20.04	41.2182
71914	5B	5B_IWB71914	415649292	15.44	49.0791		34516	4A	4A_IWB34516	4595409	3.72	8.60677		78506	2D	2D_IWA4354	14772887	20.78
8032	5B	5B_IWB8032	421669000	17.2	49.3624		10389	4A	4A_IWB10389	4620085	3.72	8.60677		75980	2D	2D_IWA965	14778580	21.24	47.2174
46693	5B	5B_IWB46693	425671696	17.78	51.1585		34577	4A	4A_IWB34577	4626726	3.72	14.3318		55334	2D	2D_IWB55334	15728939	21.24	9.49195
77942	5B	5B_IWA3633	429621812	17.78	51.1585		54258	4A	4A_IWB54258	6932685	11.77	24.9075		25031	2D	2D_IWB25031	24060026	21.97	47.2174
7678	5B	5B_IWB7678	431061084	17.78	51.0362		54256	4A	4A_IWB54256	6935762	11.77	24.9075		22365	2D	2D_IWB22365	18234286	23.29	11.2235
9364	5B	5B_IWB9364	438169956	18.49	52.0952		68921	4A	4A_IWB68921	7325025	11.77	25.6643		7706	2D	2D_IWB7706	14897946	23.99	25.9702
36033	5B	5B_IWB36033	442376762	20.09	53.4955		77567	4A	4A_IWA3161	16191671	22.54	30.901		17339	2D	2D_IWB17339	15194290	23.99	8.52004
35309	5B	5B_IWB35309	447578254	20.9	54.1103		35921	4A	4A_IWB35921	21635914	30.91			6007	2D	2D_IWB6007	16865490	23.99	25.9702
40644	5B	5B_IWB40644	448130516	20.9	58.2402		77282	4A	4A_IWA2764	24755658	31.37			16781	2D	2D_IWB16781	17605299	23.99	11.2235
44988	5B	5B_IWB44988	461289337	21.7	58.3013		54290	4A	4A_IWB54290	29069708	35.61	37.8151		8540	2D	2D_IWB8540	17605428	23.99	11.2235
9663	5B	5B_IWB9663	461298315	21.7	58.443		37033	4A	4A_IWB37033	35352947	38.95			54376	2D	2D_IWB54376	17814828	23.99	10.2777
9971	5B	5B_IWB9971	461545223	21.7	57.8314		77117	4A	4A_IWA2533	37303160	42.73	40.2698		5912	2D	2D_IWB5912	18232241	23.99	47.2174
51175	5B	5B_IWB51175	461829993	22.35	58.443		6335	4A	4A_IWB6335	37049023	43.19	40.0217		11455	2D	2D_IWB11455	18234413	23.99	11.2235
27524	5B	5B_IWB27524	462141378	23.11	58.443		78413	4A	4A_IWA4232	37045910	43.66	39.9425		19149	2D	2D_IWB19149	24368905	26.6	25.9702
51909	5B	5B_IWB51909	464595187	24.55	60.3067		42619	4A	4A_IWB42619	37061723	44.59	40.2698		2316	2D	2D_IWB2316	33839721	28.29
79193	5B	5B_IWA5217	466172014	24.55	58.2402		47589	4A	4A_IWB47589	37773840	45.07	40.2698		9642	2D	2D_IWB9642	34419207	28.86
38085	5B	5B_IWB38085	466172715	24.55	58.2402		75759	4A	4A_IWA603	37813853	45.55	40.7326		43	2D	2D_IWB43	20318304	29.37	157.72
42558	5B	5B_IWB42558	466174035	24.55	58.2402		79312	4A	4A_IWA5363	38367204	46.94	40.2698		49600	2D	2D_IWB49600	20631917	29.37	11.9459
30254	5B	5B_IWB30254	492903586	25.11	58.2402		34759	4A	4A_IWB34759	38369380	46.94	40.2698		5420	2D	2D_IWB5420	20632946	29.37	12.2364
40315	5B	5B_IWB40315	473878667	26.36	59.6758		78479	4A	4A_IWA4321	38731134	47.4	42.1568		50861	2D	2D_IWB50861	20770038	29.37	12.2364
72937	5B	5B_IWB72937	473878721	26.36	59.6758		34919	4A	4A_IWB34919	40442420	48.33			18956	2D	2D_IWB18956	22200093	29.37	12.3853
40314	5B	5B_IWB40314	473879105	26.36	59.6758		79828	4A	4A_IWA6100	45338276	48.33			60348	2D	2D_IWB60348	22204431	29.37	25.9702
52780	5B	5B_IWB52780	476797802	26.36	60.3067		32882	4A	4A_IWB32882	47391189	51.59	43.3893		75037	2D	2D_IWB75037	22449284	29.37	12.3853
79247	5B	5B_IWA5283	476801543	26.36	59.7853		63374	4A	4A_IWB63374	62110505	53.13			7001	2D	2D_IWB7001	29454322	39.45	18.2242
73106	5B	5B_IWB73106	477498906	26.36	60.2584		48136	4A	4A_IWB48136	48530185	53.64	43.3893		28572	2D	2D_IWB28572	108922133	87.02	34.1472
80060	5B	5B_IWA6468	477667708	26.36	60.2069		50371	4A	4A_IWB50371	80144980	53.64	43.3893		53449	2D	2D_IWB53449	110665512	87.02	34.1472
45894	5B	5B_IWB45894	477671023	26.36	60.5642		1726	4A	4A_IWB1726	63013498	54.19	43.3893		66107	2D	2D_IWB66107	123213900	93.07	49.5898
65086	5B	5B_IWB65086	477675468	26.36	60.2069		42248	4A	4A_IWB42248	48530857	54.74	43.3893		44074	2D	2D_IWB44074	137026706	95.62
32971	5B	5B_IWB32971	478126615	26.36	60.6769		43873	4A	4A_IWB43873	64162710	54.74	47.0432		41295	2D	2D_IWB41295	146305543	95.62	49.5898
38179	5B	5B_IWB38179	478128067	26.36	60.6769		80749	4A	4A_IWA7382	76419144	56.35	47.2145		25085	2D	2D_IWB25085	267706316	98.05	142.215
77057	5B	5B_IWA2455	478305029	26.36	60.6769		75590	4A	4A_IWA371	71250888	57.78	47.5316		81540	2D	2D_IWA8544	277937865	98.05	50.8298
33327	5B	5B_IWB33327	478756977	26.36			63549	4A	4A_IWB63549	68470282	58.25	47.5316		45857	2D	2D_IWB45857	320494760	98.55	142.215
55641	5B	5B_IWB55641	479025051	26.36	61.0246		54030	4A	4A_IWB54030	68561974	58.25	47.5316		80103	2D	2D_IWA6520	89388861	100.15	47.1097
44183	5B	5B_IWB44183	479193598	26.36	61.8357		76170	4A	4A_IWA1320	68565343	58.25	47.5316		5774	2D	2D_IWB5774	369762241	103.02	52.9635
73110	5B	5B_IWB73110	479200398	26.36	61.3819		21625	4A	4A_IWB21625	68565670	58.25	47.5316		18357	2D	2D_IWB18357	379106971	104.88	53.2391
45662	5B	5B_IWB45662	479389713	26.96	62.6018		79382	4A	4A_IWA5457	65463089	59.18	47.5316		23322	2D	2D_IWB23322	387192928	107.06
45559	5B	5B_IWB45559	479716557	26.96	61.9226		79695	4A	4A_IWA5897	97260637	60.59	48.2399		46396	2D	2D_IWB46396	382170401	107.62	54.211
79126	5B	5B_IWA5139	485905825	28.06	62.6018		47483	4A	4A_IWB47483	97260638	60.59	48.2399		53903	2D	2D_IWB53903	387192948	107.62	53.7567
76532	5B	5B_IWA1772	486086542	28.06	63.0718		76083	4A	4A_IWA1178	100634258	60.59	48.5237		43326	2D	2D_IWB43326	394787576	108.58	54.211
77569	5B	5B_IWA3164	487223161	28.06	63.0718		77473	4A	4A_IWA3027	100672554	60.59	48.5237		6349	2D	2D_IWB6349	409601404	110.01	54.211
8176	5B	5B_IWB8176	487602580	28.06	63.0718		62659	4A	4A_IWB62659	100672554	60.59	48.5237		32050	2D	2D_IWB32050	202087110	111.93	50.8298
38214	5B	5B_IWB38214	487831488	28.06	62.4859		78778	4A	4A_IWA4700	101404420	60.59	48.8382		49853	2D	2D_IWB49853	212928385	111.93	51.3139
13544	5B	5B_IWB13544	488016289	28.06	63.0718		62547	4A	4A_IWB62547	102387645	60.59	48.5237		46550	2D	2D_IWB46550	218376948	111.93	50.8298
52934	5B	5B_IWB52934	488016483	28.06	63.0718		33053	4A	4A_IWB33053	102614851	60.59	48.5237		68111	2D	2D_IWB68111	423879946	113
34690	5B	5B_IWB34690	488107093	28.06	62.4859		80625	4A	4A_IWA7216	103077344	60.59	48.5237		68110	2D	2D_IWB68110	423879944	113.53	139.791
36579	5B	5B_IWB36579	488820772	28.67	62.6018		78411	4A	4A_IWA4230	103716050	60.59	48.8382		20112	2D	2D_IWB20112	435045172	119.87	138.737
503	5B	5B_IWB503	496268186	29.29	68.3637		80360	4A	4A_IWA6873	103723995	60.59	48.5237		62960	2D	2D_IWB62960	459850058	125.84	57.0448
24761	5B	5B_IWB24761	515184173	43.11	69.191		65778	4A	4A_IWB65778	103726346	60.59	48.5237		24133	2D	2D_IWB24133	455336516	130.4	61.6846
12027	5B	5B_IWB12027	515193902	43.11	70.3001		60593	4A	4A_IWB60593	104123992	61.06	48.5237		53594	2D	2D_IWB53594	523150765	138.16	62.5411
81316	5B	5B_IWA8167	515578871	43.11	69.191		81351	4A	4A_IWA8220	104267039	61.06	48.5237		23534	2D	2D_IWB23534	377264206	147.5	108.722
72334	5B	5B_IWB72334	516469300	43.11	68.6341		25984	4A	4A_IWB25984	104267734	61.06	48.8382		30029	2D	2D_IWB30029	572360732	147.99	77.805
57100	5B	5B_IWB57100	518679920	43.11	68.3637		30780	4A	4A_IWB30780	104375678	61.06	48.5237		18906	2D	2D_IWB18906	572611800	148.63	70.9681
25639	5B	5B_IWB25639	518682396	43.11	69.191		75455	4A	4A_IWA172	106910056	61.52	48.5237		44589	2D	2D_IWB44589	574351998	148.63	85.975
10405	5B	5B_IWB10405	521138327	43.11	71.6438		80949	4A	4A_IWA7657	115913405	61.98	48.5237		26502	2D	2D_IWB26502	578929042	148.63	77.805
10415	5B	5B_IWB10415	521427116	43.11	69.191		78840	4A	4A_IWA4772	119083562	61.98	48.5237		81100	2D	2D_IWA7864	578930376	148.63	122.826
10947	5B	5B_IWB10947	527339308	43.11	69.191		74987	4A	4A_IWB74987	138423343	62.45	48.6541		28109	2D	2D_IWB28109	579535661	148.63	71.1878
35215	5B	5B_IWB35215	527609262	43.11	69.8283		32896	4A	4A_IWB32896	138832397	62.45	48.8382		61821	2D	2D_IWB61821	570949805	150.04	80.4079
53669	5B	5B_IWB53669	547647860	43.11	74.762		75405	4A	4A_IWA112	140134106	62.45	48.6541		79182	2D	2D_IWA5205	570950717	153	80.4079
21922	5B	5B_IWB21922	616481810	43.11	104.415		79790	4A	4A_IWA6046	140288311	62.91	48.6541		42352	2D	2D_IWB42352	570959478	154.51	80.4079
80247	5B	5B_IWA6721	534322809	46.97	76.939		78703	4A	4A_IWA4608	146555381	64.31	48.8382		76043	2D	2D_IWA1083	574109097	154.51	80.4079
73336	5B	5B_IWB73336	536513256	46.97	76.939		63118	4A	4A_IWB63118	164634738	65.23	48.9814		2984	2D	2D_IWB2984	572079992	155.03
43679	5B	5B_IWB43679	539460175	47.73	81.4262		3495	4A	4A_IWB3495	293295328	65.23	48.9814		62160	2D	2D_IWB62160	574109146	155.55	80.4079
54124	5B	5B_IWB54124	543620696	48.5			4844	4A	4A_IWB4844	449270007	65.23	48.9814		56369	2D	2D_IWB56369	578929290	155.55
35880	5B	5B_IWB35880	544610911	52.8			35674	4A	4A_IWB35674	182127688	66.61	48.5237		27733	2D	2D_IWB27733	588122344	158.89
78305	5B	5B_IWA4094	547406395	54.17			585	4A	4A_IWB585	230453718	66.61	48.5237		40492	2D	2D_IWB40492	588121857	160.13
42937	5B	5B_IWB42937	548428186	58	89.7889		24948	4A	4A_IWB24948	236532965	66.61	48.5237		26538	2D	2D_IWB26538	608198957	168.3	80.4414
24695	5B	5B_IWB24695	548341524	58.57			77922	4A	4A_IWA3604	413577662	66.61	48.5237		26939	2D	2D_IWB26939	607673428	169.55	80.4079
80395	5B	5B_IWA6915	550225942	60.83	93.436		61673	4A	4A_IWB61673	203847712	67.2	48.9814		26539	2D	2D_IWB26539	608199010	170.85	80.4079
56720	5B	5B_IWB56720	550395376	60.83	93.436		30091	4A	4A_IWB30091	189606196	68.36			54943	2D	2D_IWB54943	608917059	172.04	80.3483
11522	5B	5B_IWB11522	550732855	60.83	93.436		68717	4A	4A_IWB68717	250198172	69.41	48.5237		74078	2D	2D_IWB74078	608918858	177.17
20439	5B	5B_IWB20439	550928276	60.83	94.8942		58032	4A	4A_IWB58032	289721892	69.41	48.5237		4589	2D	2D_IWB4589	611212092	177.65
78397	5B	5B_IWA4211	551331767	60.83	94.8942		37921	4A	4A_IWB37921	466636736	69.87	48.9814		75394	2D	2D_IWA96	610289339	178.13	85.975
6830	5B	5B_IWB6830	551659264	60.83	95.4317		20983	4A	4A_IWB20983	467297840	71.3	48.9814		48198	2D	2D_IWB48198	611896769	178.13	81.4059
61110	5B	5B_IWB61110	553262771	60.83	95.4317		76665	4A	4A_IWA1941	467669650	71.79	48.9814		63953	2D	2D_IWB63953	612341552	178.13	81.4059
78159	5B	5B_IWA3905	553352621	60.83	95.4317		76664	4A	4A_IWA1940	467669694	71.79	48.9814		22453	2D	2D_IWB22453	612342729	178.13	81.4059
38237	5B	5B_IWB38237	554212807	60.83	95.5154		74979	4A	4A_IWB74979	473688828	72.74	48.9814		39545	2D	2D_IWB39545	612518979	181.21	111.195
45668	5B	5B_IWB45668	554822419	61.41	23.9422		46934	4A	4A_IWB46934	488252138	73.21	48.9814		55445	2D	2D_IWB55445	626807140	194.64
55120	5B	5B_IWB55120	555011224	61.41	95.4317		57309	4A	4A_IWB57309	500352785	74.59	48.9814		43052	2D	2D_IWB43052	626807845	194.64	134.46
72302	5B	5B_IWB72302	556639522	61.41	95.5154		80980	4A	4A_IWA7699	544618713	79.19	48.9814		274	2D	2D_IWB274	626807985	194.64
45849	5B	5B_IWB45849_1	557111340	61.41	96.7032		45853	4A	4A_IWB45853	543741119	80.12	48.9814		28458	2D	2D_IWB28458	628937584	195.35	93.7465
45849	5B	5B_IWB45849_2	557111340	61.41	96.7032		9215	4A	4A_IWB9215	546601723	81.11			36668	2D	2D_IWB36668	649147923	219.55	103.328
78313	5B	5B_IWA4103	558625487	61.41	97.2826		31143	4A	4A_IWB31143	562406066	82.09	50.4542		59478	2D	2D_IWB59478	650327579	223.09
43700	5B	5B_IWB43700	560397156	61.41	96.7032		5380	4A	4A_IWB5380	570478648	83.01	51.9705		35537	2D	2D_IWB35537	647278325	227.26
50957	5B	5B_IWB50957	565898778	62.62	100.643		74969	4A	4A_IWB74969	576565209	84.39	51.367		75848	2D	2D_IWA728	644725413	229.13	99.1944
76534	5B	5B_IWA1774	566679090	62.62	100.643		7495	4A	4A_IWB7495	576568972	84.39	51.367		64798	2D	2D_IWB64798	635600414	239.48	97.1352
29205	5B	5B_IWB29205	566686004	62.62	100.643		33175	4A	4A_IWB33175	576702846	84.85	51.367		24368	2D	2D_IWB24368	635951888	239.48	173.352
34530	5B	5B_IWB34530	566686138	62.62	100.643		2566	4A	4A_IWB2566	584124176	91.17	51.9705		49759	2D	2D_IWB49759	124834762	241.58	161.415
70720	5B	5B_IWB70720	566968344	62.62	100.643		47331	4A	4A_IWB47331	584120906	91.77			37030	3A	3A_IWB37030	32202234	0
39412	5B	5B_IWB39412	567152784	62.62	100.643		65999	4A	4A_IWB65999	590988419	95.28	54.3843		9026	3A	3A_IWB9026	14465155	1.27
81003	5B	5B_IWA7732	577305628	65.57	107.374		80521	4A	4A_IWA7077	590994014	95.28	54.8292		39098	3A	3A_IWB39098	9852917	2.42	4.00484
22029	5B	5B_IWB22029	577308453	65.57	107.374		77169	4A	4A_IWA2606	591700583	95.74	54.8292		26096	3A	3A_IWB26096	1483400	3.63	0
1254	5B	5B_IWB1254	579786131	66.14			79892	4A	4A_IWA6193	591873340	95.74	54.5121		47165	3A	3A_IWB47165	1500298	3.63	11.8367
81134	5B	5B_IWA7910	580103443	66.14	109.527		63874	4A	4A_IWB63874	593337515	95.74	56.3889		23458	3A	3A_IWB23458	8592806	3.63
27379	5B	5B_IWB27379	580686304	66.14	110.197		4910	4A	4A_IWB4910	594218390	96.67	58.3834		17619	3A	3A_IWB17619	2095476	4.84	15.0504
40222	5B	5B_IWB40222	584822374	68.83	116.22		34865	4A	4A_IWB34865	594211668	97.13	58.3834		7659	3A	3A_IWB7659	7432748	4.84	15.0504
43739	5B	5B_IWB43739	587126794	69.41	116.107		80795	4A	4A_IWA7442	594215556	97.13	58.3834		11852	3A	3A_IWB11852	7437153	4.84	20.7359
64098	5B	5B_IWB64098	587127305	69.41	116.107		78250	4A	4A_IWA4023	594217058	97.13	58.3834		21799	3A	3A_IWB21799	32202089	4.84
76276	5B	5B_IWA1460	587344702	70.08	116.107		8240	4A	4A_IWB8240	594663815	97.59	57.2992		56070	3A	3A_IWB56070	143521363	4.84	108.363
26282	5B	5B_IWB26282	589373385	72.18	117.343		8239	4A	4A_IWB8239	594663833	97.59	57.2992		64734	3A	3A_IWB64734	2140904	5.32	15.0504
8532	5B	5B_IWB8532	589581887	72.18	117.343		77062	4A	4A_IWA2460	594664440	97.59	57.2992		4617	3A	3A_IWB4617	143520982	5.8	15.0504
21508	5B	5B_IWB21508	591108051	72.18			6070	4A	4A_IWB6070	596821582	102.7	59.9891		53477	3A	3A_IWB53477	8686192	6.27	0
50201	5B	5B_IWB50201	591486766	72.18	117.848		51795	4A	4A_IWB51795	596821582	102.7	58.3834		28726	3A	3A_IWB28726	13909226	7.21	26.0132
6745	5B	5B_IWB6745	593943053	72.18	117.848		8569	4A	4A_IWB8569	596827483	102.7			40683	3A	3A_IWB40683	4408743	7.68	14.1045
81175	5B	5B_IWA7963	593943302	72.18	117.848		43376	4A	4A_IWB43376	597693719	103.28			65712	3A	3A_IWB65712	8865643	7.68	20.604
79161	5B	5B_IWA5179	594745455	72.18	117.848		27434	4A	4A_IWB27434	597692833	103.87			61740	3A	3A_IWB61740	9171078	7.68	26.0132
35989	5B	5B_IWB35989	594746700	72.18	117.848		27435	4A	4A_IWB27435	597693518	103.87			11728	3A	3A_IWB11728	9466627	7.68	11.8367
8116	5B	5B_IWB8116	67240703	89.63	141.669		43375	4A	4A_IWB43375	597693615	103.87	60.7562		79361	3A	3A_IWA5430	10301163	7.68	15.5244
71624	5B	5B_IWB71624	662030433	90.95	142.605		47730	4A	4A_IWB47730	599890504	104.79	61.8353		12398	3A	3A_IWB12398	10688872	7.68	16.1021
55616	5B	5B_IWB55616	663137019	92.29	143.548		12302	4A	4A_IWB12302	600900582	104.79	61.912		8501	3A	3A_IWB8501	12253770	7.68	23.6304
70546	5B	5B_IWB70546	663798945	92.29	143.548		27809	4A	4A_IWB27809	599345721	105.26	61.912		3472	3A	3A_IWB3472	12380707	7.68
61247	5B	5B_IWB61247	665958373	92.29	144.257		4821	4A	4A_IWB4821	600899010	105.73	61.912		38606	3A	3A_IWB38606	12980689	7.68	26.0132
59439	5B	5B_IWB59439	657381432	92.98	111.286		1319	4A	4A_IWB1319	601279453	108.23	61.912		57673	3A	3A_IWB57673	11381892	8.21
11032	5B	5B_IWB11032	668198283	92.98	144.257		1321	4A	4A_IWB1321	601279668	108.23	61.912		13253	3A	3A_IWB13253	9778127	8.75	15.0504
9382	5B	5B_IWB9382	668825450	92.98	144.125		6722	4A	4A_IWB6722	601314385	108.23	5.98739		41375	3A	3A_IWB41375	12323295	8.75	24.4718
46778	5B	5B_IWB46778	671302031	95.67	146.481		61485	4A	4A_IWB61485	601637814	108.7	5.98739		24498	3A	3A_IWB24498	12976740	8.75	26.0132
8195	5B	5B_IWB8195	672953298	98.96	147.846		8927	4A	4A_IWB8927	601801753	108.7	5.98739		8502	3A	3A_IWB8502	12253803	9.28	22.742
7719	5B	5B_IWB7719	678659619	101.76	150.926		6734	4A	4A_IWB6734	602911180	108.7			80000	3A	3A_IWA6387	12781485	9.83	25.4387
2993	5B	5B_IWB2993	679134238	101.76	151.283		22215	4A	4A_IWB22215	602874442	109.82			41376	3A	3A_IWB41376	12321635	10.51
78725	5B	5B_IWA4635	679347075	101.76	150.926		63340	4A	4A_IWB63340	602874329	111.09			41377	3A	3A_IWB41377	12321674	10.51
11035	5B	5B_IWB11035	679354789	101.76	150.926		40846	4A	4A_IWB40846	605732894	115.15	66.2793		8658	3A	3A_IWB8658	12998811	10.51	21.0749
56872	5B	5B_IWB56872	679804124	101.76			7448	4A	4A_IWB7448	606586747	116.07	207.329		81560	3A	3A_IWA8587	7065079	11.05	26.0132
58551	5B	5B_IWB58551	680336506	101.76	155.397		5313	4A	4A_IWB5313	607179380	117.65	66.2793		50476	3A	3A_IWB50476	8686071	11.52
81128	5B	5B_IWA7903	680358941	102.89	154.11		54608	4A	4A_IWB54608	706165116	118.17	66.9543		13339	3A	3A_IWB13339	11941610	11.99	23.4326
55382	5B	5B_IWB55382	680603510	102.89	159.614		26115	4A	4A_IWB26115	706306428	118.17	66.9543		1704	3A	3A_IWB1704	13496782	11.99	26.0132
77584	5B	5B_IWA3185	680604223	102.89	159.614		54572	4A	4A_IWB54572	610640857	118.63	68.2763		34333	3A	3A_IWB34333	14851251	11.99	26.0132
55381	5B	5B_IWB55381	680605491	102.89	161.323		39495	4A	4A_IWB39495	611201122	118.63	68.2763		57247	3A	3A_IWB57247	17538464	11.99	33.664
75348	5B	5B_IWA22	682170437	105.58	160.403		77003	4A	4A_IWA2383	611580837	120.48	69.5957		34921	3A	3A_IWB34921	515899976	11.99	26.0132
35420	5B	5B_IWB35420	682699266	105.58	161.323		74017	4A	4A_IWB74017	611582870	120.48	70.6492		50684	3A	3A_IWB50684	13500597	12.26	15.0504
56115	5B	5B_IWB56115	683143170	106.23	162.128		71770	4A	4A_IWB71770	611592333	120.48	71.2577		63795	3A	3A_IWB63795	13496977	12.84	21.3331
45135	5B	5B_IWB45135	684612222	106.23	170.51		35298	4A	4A_IWB35298	613582710	121			24276	3A	3A_IWB24276	13555368	12.84	15.0504
1968	5B	5B_IWB1968	685431645	106.23	170.51		59546	4A	4A_IWB59546	613582710	121			11649	3A	3A_IWB11649	24678634	22.03	44.8058
21455	5B	5B_IWB21455	685638351	106.23	168.135		77381	4A	4A_IWA2904	612113696	121.94	69.9639		7237	3A	3A_IWB7237	24748784	22.03	42.649
51126	5B	5B_IWB51126	685642742	106.23	168.135		80386	4A	4A_IWA6906	612113788	121.94	69.9639		3644	3A	3A_IWB3644	24752372	22.03	42.649
4136	5B	5B_IWB4136	686934922	106.23			36641	4A	4A_IWB36641	615175511	123.82	74.9628		54460	3A	3A_IWB54460	24605166	22.6	47.9923
77966	5B	5B_IWA3658	691128878	111.74	173.333		79784	4A	4A_IWA6035	604624806	125.69	75.5023		14876	3A	3A_IWB14876	24752884	22.6	44.8058
39574	5B	5B_IWB39574	548367666	114.06	194.937		78562	4A	4A_IWA4425	615220532	125.69	75.5023		78864	3A	3A_IWA4804	24606257	26.48	44.3129
40759	5B	5B_IWB40759	692634352	114.06	177.614		24962	4A	4A_IWB24962	615437578	125.69	75.8091		43092	3A	3A_IWB43092	33969168	39.95
77732	5B	5B_IWA3358	692636067	114.06	177.096		23723	4A	4A_IWB23723	617047335	130.97	79.3403		76747	3A	3A_IWA2048	34522578	41.29	59.0086
28602	5B	5B_IWB28602	696397126	116.45	184.4		78042	4A	4A_IWA3756	617947427	133.31	80.0512		76748	3A	3A_IWA2049	34524062	41.29	59.0086
64123	5B	5B_IWB64123	697118011	116.45	183.927		54997	4A	4A_IWB54997	617948862	133.31	80.0512		80529	3A	3A_IWA7086	34524435	41.29	59.0086
56420	5B	5B_IWB56420	697851885	116.45	200.307		47072	4A	4A_IWB47072	585671252	136.42	81.0663		47079	3A	3A_IWB47079	34524565	42.6	59.0086
71271	5B	5B_IWB71271	694523375	118.59	188.578		9549	4A	4A_IWB9549	618033525	140.02	83.4238		47869	3A	3A_IWB47869	36921160	46.11	61.0586
46089	5B	5B_IWB46089	693670789	121.05	73.6459		30671	4A	4A_IWB30671	618038132	140.02	84.6946		56304	3A	3A_IWB56304	44629307	53.36
10951	5B	5B_IWB10951	693874441	121.8	188.578		46985	4A	4A_IWB46985	618040079	140.02	84.6946		50720	3A	3A_IWB50720	44630417	53.36	68.656
61615	5B	5B_IWB61615	707131775	130.16	212.43		81344	4A	4A_IWA8209	622222283	140.98	87.3743		50719	3A	3A_IWB50719	44630993	53.36	68.656
22624	5B	5B_IWB22624	711629263	134.29	3.26715		22357	4A	4A_IWB22357	621845164	141.45	87.538		32527	3A	3A_IWB32527	45598509	54.06	68.656
23742	5B	5B_IWB23742	712600972	134.29	217.645		61148	4A	4A_IWB61148	622237760	141.45	85.0245		77799	3A	3A_IWA3448	45603568	54.06	73.2239
80145	5B	5B_IWA6577	712601910	134.29	217.645		46819	4A	4A_IWB46819	622277099	141.45	87.538		78031	3A	3A_IWA3739	46165651	54.06	75.5753
74919	5B	5B_IWB74919	712697171	134.29	217.645		26287	4A	4A_IWB26287	738535293	142.5			32637	3A	3A_IWB32637	44009214	54.77	101.236
6846	5B	5B_IWB6846	712902514	134.29			1375	4A	4A_IWB1375	622285961	143.01	87.3743		7895	3A	3A_IWB7895	56140249	54.77	77.5657
81171	5B	5B_IWA7957	712971286	134.29	217.645		43192	4A	4A_IWB43192	623318121	143.94	87.3743		24102	3A	3A_IWB24102	56219939	54.77	77.5657
40957	5D	5D_IWB40957	241250896	0	69.1316		43191	4A	4A_IWB43191	623318228	143.94	87.3743		63098	3A	3A_IWB63098	56399941	54.77	77.5657
39447	5D	5D_IWB39447	100931514	1.72	69.1316		71854	4A	4A_IWB71854	625249359	145.33	89.3458		21527	3A	3A_IWB21527	56675625	54.77	77.5657
58749	5D	5D_IWB58749	79991487	2.29	67.4921		77280	4A	4A_IWA2761	626063453	148.1	91.1944		73711	3A	3A_IWB73711_1	57013009	54.77	78.0586
43846	5D	5D_IWB43846	119776183	2.91	67.4921		27643	4A	4A_IWB27643	626309601	148.56	91.1944		73711	3A	3A_IWB73711_2	57013009	55.34	78.0586
80850	5D	5D_IWA7517	123499728	2.91	69.965		43656	4A	4A_IWB43656	674753442	148.56	91.1944		79068	3A	3A_IWA5067	63074139	57.14	82.4161
62708	5D	5D_IWB62708	154539793	2.91	67.4921		47707	4A	4A_IWB47707	625862234	149.48	91.1944		80942	3A	3A_IWA7649	68297933	57.14	83.8539
52140	5D	5D_IWB52140	306193976	4.87	64.4779		78058	4A	4A_IWA3774	628329113	149.97	90.5424		61873	3A	3A_IWB61873	71149373	57.14	84.4912
76609	5D	5D_IWA1872	320888416	6.61	64.4779		42243	4A	4A_IWB42243	628329113	149.97	90.5424		71478	3A	3A_IWB71478	71795778	57.14
62829	5D	5D_IWB62829	341565489	11.28	58.9363		12737	4A	4A_IWB12737	629475930	149.97	94.1145		29898	3A	3A_IWB29898	79381552	57.14	84.4912
77786	5D	5D_IWA3429	349866549	14.26	58.9363		58550	4A	4A_IWB58550	629917536	150.43			75642	3A	3A_IWA443	81707124	57.14
35177	5D	5D_IWB35177	398107125	45.87	87.0649		44184	4A	4A_IWB44184	630764552	150.43	97.5997		79136	3A	3A_IWA5151	95021415	57.14	84.7769
34532	5D	5D_IWB34532	448816302	83.55			2658	4A	4A_IWB2658	630845865	150.43	97.5997		76688	3A	3A_IWA1972	101893410	57.14
60635	5D	5D_IWB60635	560503313	149.17	204.583		57472	4A	4A_IWB57472	631574982	150.94			34922	3A	3A_IWB34922	107738831	57.14	85.0658
77362	5D	5D_IWA2877	561797114	149.17	204.583		80024	4A	4A_IWA6418	632858940	150.94	99.1901		35363	3A	3A_IWB35363	187819350	57.85
39574	5D	5D_IWB39574	548367666	163.97	194.937		29438	4A	4A_IWB29438	632858940	150.94	99.1901		40479	3A	3A_IWB40479	202638797	58.52	86.1583
51496	5D	5D_IWB51496	548368505	163.97	194.937		77587	4A	4A_IWA3188	634736484	150.94	94.1145		6920	3A	3A_IWB6920	414814569	59.11	86.1583
17884	5D	5D_IWB17884	548525562	163.97	195.389		49391	4A	4A_IWB49391	634737636	150.94	100.384		20966	3A	3A_IWB20966	423957312	59.67	85.386
7212	5D	5D_IWB7212	548879230	164.52	194.937		4577	4A	4A_IWB4577	634738182	150.94	96.0578		8105	3A	3A_IWB8105	430790353	60.8	86.1583
27155	5D	5D_IWB27155	549770546	165.59	196.082		5663	4A	4A_IWB5663	636678344	151.88	149.233		73154	3A	3A_IWB73154	434615887	60.8	86.1583
41284	5D	5D_IWB41284	549806447	165.59	195.615		62271	4A	4A_IWB62271	636678551	151.88	100.384		53942	3A	3A_IWB53942	436464476	60.8	85.386
18013	5D	5D_IWB18013	550153597	166.27			10595	4A	4A_IWB10595	636688513	151.88	100.384		39674	3A	3A_IWB39674	443816137	60.8	85.386
7302	5D	5D_IWB7302	550443660	166.88	180.054		8853	4A	4A_IWB8853	636971447	151.88	100.384		38470	3A	3A_IWB38470	445872975	60.8	85.386
6934	5D	5D_IWB6934	550578472	166.88	198.711		8782	4A	4A_IWB8782	639041843	153.74	108.722		73812	3A	3A_IWB73812	449511162	60.8	85.386
10732	5D	5D_IWB10732	550925008	166.88	199.848		11678	4A	4A_IWB11678	640249469	154.7	101.233		76765	3A	3A_IWA2069	453934347	60.8	86.1583
17701	5D	5D_IWB17701	546653556	169.72	198.189		32870	4A	4A_IWB32870	640250101	154.7	101.233		67857	3A	3A_IWB67857	456704460	60.8	86.1583
79801	5D	5D_IWA6060	546689435	169.72			8154	4A	4A_IWB8154	641402910	156.12	102.044		39272	3A	3A_IWB39272	456778546	61.4	86.5224
11570	5D	5D_IWB11570	546689952	169.72			8155	4A	4A_IWB8155	641402987	156.12	102.044		59520	3A	3A_IWB59520	495473023	61.94	86.1583
24648	5D	5D_IWB24648	546921468	169.72	198.189		55633	4A	4A_IWB55633	675133559	167.3	108.722		79963	3A	3A_IWA6306	466111373	62.15	85.386
58475	5D	5D_IWB58475	544799945	170.39			31504	4A	4A_IWB31504	675284718	167.3			63730	3A	3A_IWB63730	495073247	63.51	86.6637
46075	5D	5D_IWB46075	545214764	170.39	202.215		75906	4A	4A_IWA811	673718133	167.86	105.871		76298	3A	3A_IWA1487	497655032	63.51	86.6637
56959	5D	5D_IWB56959	545525611	170.39	127.732		31578	4A	4A_IWB31578	668749474	169.45	106.718		47534	3A	3A_IWB47534	504802153	63.51	86.6637
18919	5D	5D_IWB18919	543237654	171.82	187.152		26090	4A	4A_IWB26090	666149004	172.03	105.871		56763	3A	3A_IWB56763	507300519	64.2	88.0168
79437	5D	5D_IWA5532	539222758	173.12	184.064		77998	4A	4A_IWA3698	666149052	172.03	105.871		10578	3A	3A_IWB10578	511754996	64.88	90.5503
77322	5D	5D_IWA2821	540287209	174.43	190.801		18371	4A	4A_IWB18371	660984678	172.51	108.722		67654	3A	3A_IWB67654	512032595	64.88	88.0168
28380	5D	5D_IWB28380	541954659	174.43			61041	4A	4A_IWB61041	660988603	172.51	108.722		1822	3A	3A_IWB1822	539376448	65.73	90.5503
14018	5D	5D_IWB14018	535921864	178.5	182.678		46910	4A	4A_IWB46910	334877385	173.66	67.4733		74967	3A	3A_IWB74967	514494351	66.26	88.0168
7217	5D	5D_IWB7217	531889107	179.87	182.962		31882	4A	4A_IWB31882	652851564	174.74	110.131		78955	3A	3A_IWA4922	516122827	66.26	89.3573
5891	6A	6A_IWB5891	618369	0	2.90085		31881	4A	4A_IWB31881	652851749	174.74	110.131		72687	3A	3A_IWB72687	517075038	66.26	88.0168
5558	6A	6A_IWB5558	814827	0			65599	4A	4A_IWB65599	656779289	174.74	110.131		3210	3A	3A_IWB3210	519209987	66.26	88.0168
11199	6A	6A_IWB11199	942505	0	3.79438		17614	4A	4A_IWB17614	650602136	175.2	110.131		28607	3A	3A_IWB28607	526525029	66.26	89.3573
79352	6A	6A_IWA5417	1495643	0			8697	4A	4A_IWB8697	659014450	176.12	108.722		81071	3A	3A_IWA7826	528596660	66.26	89.3573
11785	6A	6A_IWB11785	2178229	0	6.97783		68839	4A	4A_IWB68839	659014967	176.12	108.722		36517	3A	3A_IWB36517	537420853	66.26	69.6
8077	6A	6A_IWB8077	2972683	0	4.10607		62495	4A	4A_IWB62495	660474570	176.12	108.722		30072	3A	3A_IWB30072	538847511	66.26	89.2255
12517	6A	6A_IWB12517	3773972	0.58	6.4334		61756	4A	4A_IWB61756	660475481	176.12	109.254		56927	3A	3A_IWB56927	541258101	66.26	90.5503
10105	6A	6A_IWB10105	5221726	2	13.4528		73029	4A	4A_IWB73029	648893401	178.08	111.149		72652	3A	3A_IWB72652	543178759	66.26	89.0403
23521	6A	6A_IWB23521	6725061	3.74	13.4528		35118	4A	4A_IWB35118	647131020	179.05	111.274		32556	3A	3A_IWB32556	552708655	66.8	89.4829
11242	6A	6A_IWB11242	7595547	4.52	19.2379		80702	4A	4A_IWA7322	647212769	179.58	111.272		81582	3A	3A_IWA8621	530197876	67.35	90.5503
2886	6A	6A_IWB2886	8002498	4.52	21.1205		51216	4A	4A_IWB51216	662006571	180.69	114.463		14528	3A	3A_IWB14528	557421760	67.88	90.5503
75834	6A	6A_IWA705	8694749	4.52	20.0441		44927	4A	4A_IWB44927	194672014	181.19	114.463		64832	3A	3A_IWB64832	564943946	67.88	90.5503
63873	6A	6A_IWB63873	9322224	4.52			51217	4A	4A_IWB51217	662006679	181.19	114.463		79250	3A	3A_IWA5286	571407300	67.88	90.5503
69896	6A	6A_IWB69896	12097588	8.26	27.1508		41761	4A	4A_IWB41761	688095632	181.19	117.439		30070	3A	3A_IWB30070	538846606	68.48	90.5503
3722	6A	6A_IWB3722	13071544	8.26			41759	4A	4A_IWB41759	688095905	181.19	114.463		64679	3A	3A_IWB64679	576605649	69.44	93.0399
7466	6A	6A_IWB7466	13806456	11.84	28.8464		9263	4A	4A_IWB9263	692272800	181.65	118.718		59547	3A	3A_IWB59547	576912282	69.44	93.0399
13344	6A	6A_IWB13344	16233452	16.23	33.8751		7057	4A	4A_IWB7057	318960186	183.09	121.668		46578	3A	3A_IWB46578	579377803	69.44	93.0399
9848	6A	6A_IWB9848	16387006	16.23	33.8751		57645	4A	4A_IWB57645	694674136	183.09	120.106		30296	3A	3A_IWB30296	586879779	71.47	93.0399
16122	6A	6A_IWB16122	17530673	16.92			27122	4A	4A_IWB27122	308190028	186.89	122.686		76577	3A	3A_IWA1831	593342541	73.95	94.5185
75263	6A	6A_IWB75263	17639192	16.92	35.9697		17184	4A	4A_IWB17184	698888854	186.89	122.686		37155	3A	3A_IWB37155	557409608	75.13	90.3117
1211	6A	6A_IWB1211	17913024	16.92	43.0971		54948	4A	4A_IWB54948	699885236	186.89	127.122		80517	3A	3A_IWA7073	600007728	75.69	95.25
59637	6A	6A_IWB59637	30277843	16.92	33.7548		75721	4A	4A_IWA559	699900707	187.36	127.122		81439	3A	3A_IWA8374	608379938	77.4	101.005
7568	6A	6A_IWB7568	21707016	18.88	41.1106		75720	4A	4A_IWA558	699901225	187.36	122.686		936	3A	3A_IWB936	617534505	82.08	103.309
36506	6A	6A_IWB36506	51399093	56.14	63.6982		39715	4A	4A_IWB39715	699788614	188.33	124.394		10749	3A	3A_IWB10749	620212087	82.08
7827	6A	6A_IWB7827	51409080	56.14			34807	4A	4A_IWB34807	700422179	188.33	122.993		19672	3A	3A_IWB19672	602686417	82.93	98.1791
34778	6A	6A_IWB34778	52019801	57.27			8184	4A	4A_IWB8184	702070444	189.72	125.872		60745	3A	3A_IWB60745	615702212	84.23
80310	6A	6A_IWA6806	52021042	57.27			47004	4A	4A_IWB47004	702698911	190.68	127.122		9778	3A	3A_IWB9778	623038468	84.25	103.83
76722	6A	6A_IWA2017	49193247	57.87	63.6982		11158	4A	4A_IWB11158	702039471	191.63			65532	3A	3A_IWB65532	624445570	85.55	104.945
72627	6A	6A_IWB72627	53508683	57.87	65.9839		66169	4A	4A_IWB66169	702701003	193.2	127.713		35484	3A	3A_IWB35484	636446741	86.09
3978	6A	6A_IWB3978	54178844	57.87	65.9839		50636	4A	4A_IWB50636	131448883	193.79			80566	3A	3A_IWA7132	621326759	87.29	101.005
56139	6A	6A_IWB56139	60022663	61.72	69.2754		45334	4A	4A_IWB45334	550446539	193.79			61883	3A	3A_IWB61883	624535298	89.34	104.728
20150	6A	6A_IWB20150	64314892	62.44	71.9768		47013	4A	4A_IWB47013	669204241	193.79	127.122		73345	3A	3A_IWB73345	624534084	89.87	105.054
40867	6A	6A_IWB40867	67538430	62.44	71.9768		26352	4A	4A_IWB26352	669383630	193.79	136.801		78901	3A	3A_IWA4851	625239797	89.87	105.667
80445	6A	6A_IWA6978	65655547	63.08	71.7274		17166	4A	4A_IWB17166	701762449	193.79	125.624		5751	3A	3A_IWB5751	625533807	89.87	101.005
58233	6A	6A_IWB58233	65553522	63.7	71.7274		61808	4A	4A_IWB61808	705178704	193.79	127.122		5794	3A	3A_IWB5794	627254091	89.87	101.005
10097	6A	6A_IWB10097	71088906	64.34	73.0823		68597	4A	4A_IWB68597	705510379	193.79	136.266		76125	3A	3A_IWA1260	627676955	89.87	101.005
26570	6A	6A_IWB26570	71449249	64.34	71.9768		73329	4A	4A_IWB73329	712863689	193.79	137.91		11155	3A	3A_IWB11155	627825027	89.87	101.005
40185	6A	6A_IWB40185	73575854	65.57	72.8953		7445	4A	4A_IWB7445	712956486	193.79	137.91		58656	3A	3A_IWB58656	628698765	90.32	101.005
78808	6A	6A_IWA4738	75371075	65.57	74.2376		12105	4A	4A_IWB12105	707039370	194.86			27980	3A	3A_IWB27980	639024949	92.14	106.703
65857	6A	6A_IWB65857	97809630	65.57	74.2376		28895	4A	4A_IWB28895	703442182	195.89	135.185		6793	3A	3A_IWB6793	633058149	93.62	105.667
2409	6A	6A_IWB2409	72974817	66.12	71.9768		6688	4A	4A_IWB6688	738383639	196.35	137.044		80457	3A	3A_IWA6996	633849394	93.62	105.667
46525	6A	6A_IWB46525	88772666	66.12	74.2376		10488	4A	4A_IWB10488	713518979	197.26	137.91		30159	3A	3A_IWB30159	633849431	93.62	105.667
79948	6A	6A_IWA6288	525759372	72.37	84.1122		27993	4A	4A_IWB27993	713137176	198.87			80458	3A	3A_IWA6997	633854986	93.62	105.667
11354	6A	6A_IWB11354	531394562	72.37	82.3833		27405	4A	4A_IWB27405	523047722	205.22	137.91		60142	3A	3A_IWB60142	635151811	94.09	105.667
38654	6A	6A_IWB38654	532318211	72.96	82.3833		56868	4A	4A_IWB56868	723523936	205.77			25637	3A	3A_IWB25637	638208731	94.63
60244	6A	6A_IWB60244	533256714	72.96	85.388		15973	4A	4A_IWB15973	716997870	206.36			44443	3A	3A_IWB44443	639086514	95.19	106.316
65994	6A	6A_IWB65994	536437187	72.96	84.6607		2177	4A	4A_IWB2177	718866232	207.52	139.966		79103	3A	3A_IWA5114	644804319	95.55	108.897
7513	6A	6A_IWB7513	557933700	74.71	86.3896		18319	4A	4A_IWB18319	722299850	209.63	25.6011		20567	3A	3A_IWB20567	645094822	95.55	108.897
72803	6A	6A_IWB72803	562931621	74.71	89.0785		61457	4A	4A_IWB61457	719179076	209.63	139.966		41329	3A	3A_IWB41329	645149190	95.55	108.897
79721	6A	6A_IWA5940	563378417	74.71	90.5331		42011	4A	4A_IWB42011	723141601	210.85	44.7377		68593	3A	3A_IWB68593	645408093	95.55	195.099
69933	6A	6A_IWB69933	563558658	74.71	90.5331		27971	4A	4A_IWB27971	726438739	212.02	144.377		79529	3A	3A_IWA5657	645562634	95.55	108.897
72440	6A	6A_IWB72440	563742729	74.71	90.5331		24691	4A	4A_IWB24691	726446463	212.02	144.377		69690	3A	3A_IWB69690	646848743	96.12	108.897
73137	6A	6A_IWB73137	564515617	74.71	91.8838		6689	4A	4A_IWB6689	719164290	212.5	139.966		70905	3A	3A_IWB70905	645995633	97.42	108.897
11206	6A	6A_IWB11206	564717875	74.71	91.8838		31333	4A	4A_IWB31333	719167048	212.5	139.301		70904	3A	3A_IWB70904	645995656	97.42	108.897
8308	6A	6A_IWB8308	564723645	74.71	91.8838		25400	4A	4A_IWB25400	722886222	212.5	139.966		70903	3A	3A_IWB70903	645995725	97.42	108.79
11268	6A	6A_IWB11268	568503337	75.25	91.8838		73237	4A	4A_IWB73237	726299684	212.5	42.0848		70901	3A	3A_IWB70901	645995883	97.42	108.79
49282	6A	6A_IWB49282	570374838	75.25	99.0403		64400	4A	4A_IWB64400	722413520	213.64			14389	3A	3A_IWB14389	646272640	97.42	108.79
80122	6A	6A_IWA6550	570380855	75.25	99.0403		4337	4A	4A_IWB4337	287195049	215.59	144.377		40964	3A	3A_IWB40964	650041456	101.75	110.545
8212	6A	6A_IWB8212	572571915	75.25	93.1305		58087	4A	4A_IWB58087	729820076	216.27	145.187		56626	3A	3A_IWB56626	650041783	101.75	109.946
8760	6A	6A_IWB8760	580280921	82.79	100.121		41125	4A	4A_IWB41125	729705359	216.98	146.453		56625	3A	3A_IWB56625	650041813	101.75	109.946
5710	6A	6A_IWB5710	582253754	82.79	99.0112		74482	4A	4A_IWB74482	726979045	217.55	43.4742		40965	3A	3A_IWB40965	650042002	101.75	110.545
21617	6A	6A_IWB21617	585429518	86.19			26474	4A	4A_IWB26474	729799027	218.08	42.0848		26279	3A	3A_IWB26279	650423696	101.75	110.545
24573	6A	6A_IWB24573	591732069	89.52	110.847		57765	4A	4A_IWB57765	722413435	219.37	139.966		49970	3A	3A_IWB49970	650425865	101.75	110.545
3096	6A	6A_IWB3096	592467720	90.15	112.639		3261	4A	4A_IWB3261	730991269	221.14			52010	3A	3A_IWB52010	650427560	101.75	109.946
65466	6A	6A_IWB65466	592475421	90.15	112.639		23840	4A	4A_IWB23840	731310766	221.14	147.151		27648	3A	3A_IWB27648	651627266	101.75	109.946
64875	6A	6A_IWB64875	594748659	96.85	117.771		23688	4A	4A_IWB23688	732511757	223.08	147.282		27647	3A	3A_IWB27647	651627366	101.75	109.946
61092	6A	6A_IWB61092	594959438	96.85	117.871		36777	4A	4A_IWB36777	732515570	223.08	147.282		79381	3A	3A_IWA5456	653242938	101.75	109.946
77123	6A	6A_IWA2539	596422225	100.13	123.481		42225	4A	4A_IWB42225	732518661	223.08	147.282		78870	3A	3A_IWA4810	653512934	101.75	109.946
77122	6A	6A_IWA2538	596422368	100.13	123.481		15031	4A	4A_IWB15031	732772185	223.59	147.151		32274	3A	3A_IWB32274	654589897	102.48	111.622
11953	6A	6A_IWB11953	600406158	109.51	130.7		12505	4A	4A_IWB12505	733639141	223.59	149.527		26056	3A	3A_IWB26056	657616589	103.12	111.622
79563	6A	6A_IWA5704	602706822	110.06	136.851		60692	4A	4A_IWB60692	741451832	223.59	149.527		75051	3A	3A_IWB75051	657928221	103.12
64256	6A	6A_IWB64256	604877125	114.35	136.701		68322	4A	4A_IWB68322	427378084	224.05	151.327		35924	3A	3A_IWB35924	688388254	103.12	80.129
64255	6A	6A_IWB64255	604877158	114.35	136.701		22080	4A	4A_IWB22080	737340566	224.54	152.986		55588	3A	3A_IWB55588	495023721	104.15
64043	6A	6A_IWB64043	604885112	115.03	136.656		34248	4A	4A_IWB34248	737410740	225.58	42.0848		75777	3A	3A_IWA623	657947440	104.15	111.622
77425	6A	6A_IWA2967	605230098	116.74	138.044		29253	4A	4A_IWB29253	732978394	226.17			43064	3A	3A_IWB43064	657947895	104.15	111.622
24306	6A	6A_IWB24306	605231918	116.74	138.306		28357	4A	4A_IWB28357	737501836	226.86	164.13		35440	3A	3A_IWB35440	658902861	104.74	112.881
71122	6A	6A_IWB71122	605552753	116.74	135.758		71323	4A	4A_IWB71323	737340710	228.85			76627	3A	3A_IWA1892	659158300	104.74	113.176
35245	6A	6A_IWB35245	605564404	116.74	135.758		24532	4A	4A_IWB24532	737335339	229.42	151.311		76613	3A	3A_IWA1878	659160419	104.74	113.176
10077	6A	6A_IWB10077	606439788	116.74			71764	4A	4A_IWB71764	739598120	231.16	154.298		76612	3A	3A_IWA1877	659160711	104.74	113.176
79881	6A	6A_IWA6182	606765822	117.32	138.306		757	4A	4A_IWB757	569952452	232.23	154.298		80593	3A	3A_IWA7169	659161919	104.74	113.176
74304	6A	6A_IWB74304	606964649	117.32	138.044		71768	4A	4A_IWB71768	739600427	232.23	152.986		80208	3A	3A_IWA6672	659393696	104.74	113.176
16528	6A	6A_IWB16528	606979706	117.32	138.044		63410	4A	4A_IWB63410	599222803	233.65	153.879		64060	3A	3A_IWB64060	660235219	104.74
27245	6A	6A_IWB27245	608711535	120.43			57367	4A	4A_IWB57367	712851567	233.65	164.13		35470	3A	3A_IWB35470	658902861	105.27	112.9
78770	6A	6A_IWA4691	608967953	120.43	138.044		9476	4A	4A_IWB9476	733992787	233.65	152.227		42260	3A	3A_IWB42260	661971551	105.27
80114	6A	6A_IWA6536	609003352	120.43	138.044		29950	4A	4A_IWB29950	733999554	233.65	150.713		73699	3A	3A_IWB73699	662933621	106.34	114.554
113	6A	6A_IWB113	610200112	120.43	140.866		19553	4A	4A_IWB19553	733999722	233.65	152.986		23087	3A	3A_IWB23087	663580439	106.34
37760	6A	6A_IWB37760	609379828	121.1	140.866		19596	4A	4A_IWB19596	733999734	233.65	152.986		71564	3A	3A_IWB71564	662948701	107.08	114.554
8248	6A	6A_IWB8248	610348988	121.76	140.866		12593	4A	4A_IWB12593	734001835	233.65	150.713		67124	3A	3A_IWB67124	663293066	107.56	114.554
8719	6A	6A_IWB8719	610406637	121.76	140.866		66306	4A	4A_IWB66306	741473234	233.65	153.879		67125	3A	3A_IWB67125	663297611	107.56	114.554
38204	6A	6A_IWB38204	610654303	121.76			23246	4A	4A_IWB23246	742281501	233.65	16.445		30436	3A	3A_IWB30436	663438606	107.56
32304	6A	6A_IWB32304	611313093	122.33	140.866		68148	4A	4A_IWB68148	744272100	235.12	163.833		4406	3A	3A_IWB4406	663439287	107.56	111.28
65928	6A	6A_IWB65928	611411782	122.33	140.866		21159	4A	4A_IWB21159	737296568	249.15	150.713		48064	3A	3A_IWB48064	663580883	107.56	112.881
45780	6A	6A_IWB45780	611483364	122.33	140.704		48970	4B	4B_IWB48970	4522926	0	25.999		11684	3A	3A_IWB11684	666242544	107.56	113.857
73388	6A	6A_IWB73388	611669545	122.33			47977	4B	4B_IWB47977	52072742	1.38	27.3871		28028	3A	3A_IWB28028	699694301	107.56	114.554
8323	6A	6A_IWB8323	611712963	122.33	140.866		75683	4B	4B_IWA506	52074204	1.38	27.3871		35125	3A	3A_IWB35125	686785022	113.58	124.296
79610	6A	6A_IWA5768	611857605	122.33	140.704		13107	4B	4B_IWB13107	10437508	2.3			8043	3A	3A_IWB8043	688617193	114.23	129.978
73750	6A	6A_IWB73750	613833969	123.09	140.866		4336	4B	4B_IWB4336	12247722	5.52	32.6582		30485	3A	3A_IWB30485	688617382	114.23	130.173
26059	6A	6A_IWB26059	613834220	123.09	140.866		8084	4B	4B_IWB8084	12893649	5.98			40418	3A	3A_IWB40418	688883787	114.84	130.173
55762	6A	6A_IWB55762	615780878	123.09	162.485		28069	4B	4B_IWB28069	619975970	5.98			73101	3A	3A_IWB73101	686783982	115.45	124.296
26186	6A	6A_IWB26186	615466845	123.92	122.92		34259	4B	4B_IWB34259	14122698	7.04	39.9308		73102	3A	3A_IWB73102	686784088	115.45	124.296
77680	6B	6B_IWA3297	3870370	0	0.374793		71830	4B	4B_IWB71830	13411281	8.09	35.0984		11580	3A	3A_IWB11580	686784181	115.93	124.296
76790	6B	6B_IWA2098	6220498	0.68	0.374793		45064	4B	4B_IWB45064	16787936	8.59	38.625		63055	3A	3A_IWB63055	686785423	115.93	124.296
19933	6B	6B_IWB19933	6221440	0.68	0.374793		50288	4B	4B_IWB50288	19742841	13.63	41.6547		8010	3A	3A_IWB8010	686785816	115.93	124.296
76304	6B	6B_IWA1494	8409138	2.02	7.79453		42788	4B	4B_IWB42788	19746069	13.63	41.6547		6678	3A	3A_IWB6678	688884040	116.5	130.173
80234	6B	6B_IWA6704	8410379	2.02	7.79453		77675	4B	4B_IWA3290	20588956	14.1	44.5747		40420	3A	3A_IWB40420	688886994	116.5	130.173
59378	6B	6B_IWB59378	8781213	3.45	9.47817		46249	4B	4B_IWB46249	21553941	17.33	45.7194		75961	3A	3A_IWA926	688673058	116.98	131.338
63101	6B	6B_IWB63101	8781523	3.45	0.374793		24098	4B	4B_IWB24098	23657337	18.3	47.6318		54057	3A	3A_IWB54057	688675388	116.98	131.039
23394	6B	6B_IWB23394	9036237	3.45			59993	4B	4B_IWB59993	25784219	18.82	47.2753		8579	3A	3A_IWB8579	688688720	116.98	131.338
77696	6B	6B_IWA3316	17229772	15.58	20.9445		59992	4B	4B_IWB59992	25784409	18.82	47.2753		76732	3A	3A_IWA2029	688689024	116.98	131.554
78723	6B	6B_IWA4633	17405496	15.58	21.1055		73001	4B	4B_IWB73001	26491532	21.33	50.8465		40419	3A	3A_IWB40419	688887100	117.46	130.173
63695	6B	6B_IWB63695	11589533	17.07	27.1508		56078	4B	4B_IWB56078	32250770	26.54	54.637		47680	3A	3A_IWB47680	692057479	119.52	133.611
40111	6B	6B_IWB40111	12286802	18.65	25.5258		35611	4B	4B_IWB35611	40752468	28.39	57.4885		20736	3A	3A_IWB20736	693460938	120.04	136.176
11022	6B	6B_IWB11022	23308776	18.65	204.583		60126	4B	4B_IWB60126	38280897	29.4	56.1862		20737	3A	3A_IWB20737	693461697	120.04	136.176
62692	6B	6B_IWB62692	21420567	22.87	25.8168		71022	4B	4B_IWB71022	38280619	29.9	55.5453		23450	3A	3A_IWB23450	696241723	120.54	138.069
6216	6B	6B_IWB6216	21420887	22.87	25.8168		54172	4B	4B_IWB54172	140898246	35.01	62.9995		77105	3A	3A_IWA2518	696243396	120.54	138.069
47927	6B	6B_IWB47927	25914950	26.04			27326	4B	4B_IWB27326	167346674	35.01	61.8377		38325	3A	3A_IWB38325	693461948	121.02	136.176
73576	6B	6B_IWB73576	27947163	29.8	33.7548		24800	4B	4B_IWB24800	281735002	37.35	62.5642		3832	3A	3A_IWB3832	695502662	121.57	88.0751
7468	6B	6B_IWB7468	35633379	33.54	36.5101		46968	4B	4B_IWB46968	338426727	37.85			899	3A	3A_IWB899	695512105	121.57	136.176
53462	6B	6B_IWB53462	36053206	33.54	41.3807		71075	4B	4B_IWB71075	428701593	38.43	65.5905		7306	3A	3A_IWB7306	697390323	123.01	138.069
76997	6B	6B_IWA2375	61495531	49.85	46.9633		34414	4B	4B_IWB34414	440328201	40.08	66.3239		7097	3A	3A_IWB7097	697454118	123.01	138.069
12025	6B	6B_IWB12025_2	115699930	52.56	58.1954		77705	4B	4B_IWA3325	443453538	40.08	66.3239		12563	3A	3A_IWB12563	697456576	123.01	130.173
12025	6B	6B_IWB12025_1	115699930	52.56	58.1954		28037	4B	4B_IWB28037	445329187	40.56			7623	3A	3A_IWB7623	699765819	126.37	141.858
79246	6B	6B_IWA5282	117502488	52.56			1339	4B	4B_IWB1339	449124867	40.56	66.3239		80006	3A	3A_IWA6395	699858000	126.37	141.858
76113	6B	6B_IWA1243	117837874	52.56	57.074		17423	4B	4B_IWB17423	449644224	40.56	64.038		80007	3A	3A_IWA6396	699858298	126.37	141.544
78814	6B	6B_IWA4745	118967499	52.56			22352	4B	4B_IWB22352	511158837	43.88			31321	3A	3A_IWB31321	700329173	126.37	141.337
10625	6B	6B_IWB10625	126138864	52.56	57.074		29310	4B	4B_IWB29310	511158957	43.88			50481	3A	3A_IWB50481	700693482	127.93	142.765
51340	6B	6B_IWB51340	130303267	52.56			64397	4B	4B_IWB64397	517623777	44.34	68.4522		39724	3A	3A_IWB39724	700591297	129.09	142.646
79058	6B	6B_IWA5055	131221299	52.56	58.1954		23967	4B	4B_IWB23967	518682880	45.33	66.2245		34330	3A	3A_IWB34330	700737026	129.67
50119	6B	6B_IWB50119	132440114	52.56	58.1954		23968	4B	4B_IWB23968	518683016	45.33	68.4522		29012	3A	3A_IWB29012	710794998	136.24	146.052
70710	6B	6B_IWB70710	138706227	52.56			73007	4B	4B_IWB73007	518684260	45.33	66.2245		44099	3A	3A_IWB44099	710832499	136.24	102.545
77400	6B	6B_IWA2937	143436981	52.56	58.1954		73006	4B	4B_IWB73006	518684289	45.33	71.4614		50625	3A	3A_IWB50625	710947370	136.73	146.052
1248	6B	6B_IWB1248	144001431	52.56			6680	4B	4B_IWB6680	519257712	45.8	72.3182		11287	3A	3A_IWB11287	711065491	137.91	148.027
72771	6B	6B_IWB72771	157475477	53.13	59.9113		44800	4B	4B_IWB44800	520212846	46.75	68.4522		26072	3A	3A_IWB26072	710831518	138.49	145.584
43115	6B	6B_IWB43115	174568619	55.09	64.0838		40589	4B	4B_IWB40589	520214509	46.75	68.4522		26070	3A	3A_IWB26070	710832013	138.49	145.584
38805	6B	6B_IWB38805	178013875	55.09	64.0838		48360	4B	4B_IWB48360	520221801	46.75	68.4522		43795	3A	3A_IWB43795	713216181	141.13	147.939
826	6B	6B_IWB826	179360033	55.09	64.0838		29917	4B	4B_IWB29917	641570041	65.65	83.5527		49197	3A	3A_IWB49197	714300447	144.4	149.487
28178	6B	6B_IWB28178	182583134	55.09	64.0838		75109	4B	4B_IWB75109	643283605	68.59	84.7556		76094	3A	3A_IWA1207	714155869	143.77
5780	6B	6B_IWB5780	190124171	55.09	64.0838		36237	4B	4B_IWB36237	642943499	69.14			12652	3A	3A_IWB12652	714156164	143.77	149.487
6726	6B	6B_IWB6726	191527596	55.09	77.1385		7462	4B	4B_IWB7462	642946159	69.68	85.8763		71198	3A	3A_IWB71198	714298995	143.77	149.487
78180	6B	6B_IWA3933	199078216	55.09	64.0838		81032	4B	4B_IWA7772	642945448	70.22			47740	3A	3A_IWB47740	714303508	144.4	149.487
50756	6B	6B_IWB50756	201791113	55.09	63.2844		20754	4B	4B_IWB20754	643537815	70.76	86.5549		12651	3A	3A_IWB12651	714156215	144.81	149.487
31271	6B	6B_IWB31271	204680417	55.09	64.0838		72696	4B	4B_IWB72696	643650789	71.25	86.9902		76995	3A	3A_IWA2372	714302539	144.81	149.487
47293	6B	6B_IWB47293	207110152	55.09	63.2844		73510	4B	4B_IWB73510	643651474	71.25	87.3295		41929	3A	3A_IWB41929	714425055	145.83	149.487
78138	6B	6B_IWA3878	207928022	55.09	63.2844		78322	4B	4B_IWA4115	643773372	71.25	86.9902		78941	3A	3A_IWA4905	716070437	146.9
51876	6B	6B_IWB51876	211215120	55.09	63.2844		64987	4B	4B_IWB64987	645300903	71.74	86.5549		2461	3A	3A_IWB2461	717728758	155.94	151.829
60265	6B	6B_IWB60265	219096216	55.09	64.0838		34604	4B	4B_IWB34604	645298597	72.74	89.3995		10899	3A	3A_IWB10899	717653817	156.96	151.747
31397	6B	6B_IWB31397	224215557	55.09			55798	4B	4B_IWB55798	558596709	74.3	90.0713		366	3A	3A_IWB366	717903487	156.96	151.747
57022	6B	6B_IWB57022	226369221	55.09	64.0838		24856	4B	4B_IWB24856	646267523	74.3	90.0713		9606	3A	3A_IWB9606	721665960	160.61	157.611
78671	6B	6B_IWA4570	229520087	55.09	64.0838		32964	4B	4B_IWB32964	646308103	74.3	90.0713		43831	3A	3A_IWB43831	721449692	161.65	156.823
28902	6B	6B_IWB28902	232168465	55.09	64.0838		48887	4B	4B_IWB48887	646658306	74.3	90.0713		24224	3A	3A_IWB24224	721452492	161.65	156.823
36358	6B	6B_IWB36358	452188733	55.09	67.2402		38092	4B	4B_IWB38092	646658931	74.3	90.0713		76202	3A	3A_IWA1367	722207862	162.12	158.356
46081	6B	6B_IWB46081	456769523	55.09	66.3618		76600	4B	4B_IWA1861	648314518	75.69	90.7053		6092	3A	3A_IWB6092	722207862	162.12	158.356
33714	6B	6B_IWB33714	459056538	55.09	66.3618		72179	4B	4B_IWB72179	648314518	75.69	90.7053		76201	3A	3A_IWA1366	722207912	162.12	158.356
33826	6B	6B_IWB33826	460087895	55.62	66.3618		77962	4B	4B_IWA3654	649473314	76.65	91.192		81060	3A	3A_IWA7812	722214948	162.12	158.356
11021	6B	6B_IWB11021	175719158	56.16	64.0838		32544	4B	4B_IWB32544	649473985	76.65	90.7053		32649	3A	3A_IWB32649	724743199	164.13
22885	6B	6B_IWB22885	188189690	56.16	64.0838		25966	4B	4B_IWB25966	649474873	76.65	90.7053		13994	3A	3A_IWB13994	724201149	166.14	166.192
7575	6B	6B_IWB7575	199718583	56.16	64.0838		33076	4B	4B_IWB33076	649603840	77.57	92.1242		6953	3A	3A_IWB6953	724319928	166.14	166.192
23092	6B	6B_IWB23092	201223023	56.16	64.0838		41718	4B	4B_IWB41718	649830071	78.49	98.6531		10817	3A	3A_IWB10817	726997325	167.45	167.526
76783	6B	6B_IWA2090	221813724	56.16	64.0838		42230	4B	4B_IWB42230	650037049	78.49			61868	3A	3A_IWB61868	727070435	167.45	167.526
81039	6B	6B_IWA7783	229279743	56.16	64.0838		81336	4B	4B_IWA8197	650688384	78.49	95.6371		55044	3A	3A_IWB55044	729576250	169.14	169.89
8575	6B	6B_IWB8575	455449027	56.16	66.3618		76734	4B	4B_IWA2031	650891994	79	98.6531		29417	3A	3A_IWB29417	733492990	172.83
79298	6B	6B_IWA5345	469787916	56.77	66.3969		58130	4B	4B_IWB58130	650891994	79	98.6531		56227	3A	3A_IWB56227	733571264	176.78	177.242
76867	6B	6B_IWA2194	475315161	57.36			35044	4B	4B_IWB35044	650893119	79	98.6531		478	3A	3A_IWB478	733965007	176.78
76308	6B	6B_IWA1499	471167204	58	66.3969		7266	4B	4B_IWB7266	651991480	79.46	97.7346		61269	3A	3A_IWB61269	728322627	177.26	173.585
53703	6B	6B_IWB53703	474177903	58.63	66.3969		42232	4B	4B_IWB42232	650037463	79.98			7347	3A	3A_IWB7347	730279092	177.26
77674	6B	6B_IWA3289	521035796	61.11	67.2402		54964	4B	4B_IWB54964	649835719	80.6	95.5617		7071	3A	3A_IWB7071	730849250	177.26	173.152
41729	6B	6B_IWB41729	37786718	63.62	97.2642		48353	4B	4B_IWB48353	653011491	81.76	97.7346		80539	3A	3A_IWA7099	731005499	177.26	173.152
81117	6B	6B_IWA7886	574029271	64.34	71.7641		68974	4B	4B_IWB68974	653410931	81.76			64908	3A	3A_IWB64908	731085765	177.26	174.341
29642	6B	6B_IWB29642	37786827	65.08	71.7641		283	4B	4B_IWB283	660428821	95.84	109.236		3508	3A	3A_IWB3508	731222184	177.26	173.585
71759	6B	6B_IWB71759	567601346	65.08	71.7641		42997	4B	4B_IWB42997	660411105	96.96	109.236		12017	3A	3A_IWB12017	732042533	177.26	173.152
81168	6B	6B_IWA7954	571734683	65.08	71.7641		3567	4B	4B_IWB3567	660589159	101.74	109.511		79100	3A	3A_IWA5111	732058287	177.26	173.152
23748	6B	6B_IWB23748	574662771	65.08	71.7641		6021	4B	4B_IWB6021	660589226	101.74	109.511		56532	3A	3A_IWB56532	732472525	177.26
71734	6B	6B_IWB71734	582340984	67.08	71.972		8859	4B	4B_IWB8859	660719506	102.67	110.84		10331	3A	3A_IWB10331	732494121	177.26	177.242
72356	6B	6B_IWB72356	584582036	67.08			7958	4B	4B_IWB7958	663106686	110.17	113.671		35582	3A	3A_IWB35582	732668328	177.26	177.242
79152	6B	6B_IWA5170	595289030	67.08	72.2882		53167	4B	4B_IWB53167	662766383	110.79			34554	3A	3A_IWB34554	732779682	177.26
80366	6B	6B_IWA6879	612442483	67.72	62.5334		54404	4B	4B_IWB54404	664157623	110.79			29489	3A	3A_IWB29489	569287215	177.75	173.152
78982	6B	6B_IWA4959	613297099	67.72	71.9017		12585	4B	4B_IWB12585	665568306	111.33	114.871		35035	3A	3A_IWB35035	732667346	177.75	177.242
64629	6B	6B_IWB64629	616325597	67.72	71.9017		34655	4B	4B_IWB34655	665568384	111.33	114.871		59641	3A	3A_IWB59641	733995625	178.27
73052	6B	6B_IWB73052	618137739	67.72	72.0833		51435	4B	4B_IWB51435	665568389	111.33	114.871		61557	3A	3A_IWB61557	733997225	178.27	143.007
75807	6B	6B_IWA670	633536293	68.32	73.2428		22209	4B	4B_IWB22209	664938711	111.84			79101	3A	3A_IWA5112	733998313	178.27
77907	6B	6B_IWA3585	639990950	68.32	91.8838		80879	4B	4B_IWA7555	664963541	111.84			78433	3A	3A_IWA4258	734129910	178.76
4417	6B	6B_IWB4417	639993391	68.32	73.4185		77356	4B	4B_IWA2869	666050126	113.26	114.871		79873	3A	3A_IWA6173	734130859	178.76
76449	6B	6B_IWA1679	642348316	68.32	73.925		27444	4B	4B_IWB27444	667613297	113.73	148.304		37804	3A	3A_IWB37804	734131189	178.76
60027	6B	6B_IWB60027	645353503	68.32	75.7492		33017	4B	4B_IWB33017	667617089	115.37			78434	3A	3A_IWA4259	734129894	179.26
7171	6B	6B_IWB7171	646707165	68.96	75.7492		44151	4B	4B_IWB44151	667683907	117.22			14956	3A	3A_IWB14956	735323794	179.26
47763	6B	6B_IWB47763	657090859	71.86	76.2001		39069	4B	4B_IWB39069	672937034	120.4	170.428		1419	3A	3A_IWB1419	737014708	181.17	61.0586
2781	6B	6B_IWB2781	668245614	78.82	82.0153		39067	4B	4B_IWB39067	672937131	120.4	170.428		79169	3A	3A_IWA5190	737677104	182.57
72198	6B	6B_IWB72198	674103610	81.31	82.5628		22427	4D	4D_IWB22427	6149405	0	5.60696		2753	3A	3A_IWB2753	739146383	184.47	181.123
10697	6B	6B_IWB10697	676152286	84.09	90.5503		12380	4D	4D_IWB12380	3429990	0.46	18.3989		11435	3A	3A_IWB11435	739147183	184.47	181.123
69684	6B	6B_IWB69684	676492639	84.09	86.504		19937	4D	4D_IWB19937	3695090	4.15	21.3122		35872	3A	3A_IWB35872	739159057	184.47	180.325
74080	6B	6B_IWB74080	678175525	84.09	85.9623		19938	4D	4D_IWB19938	3695094	4.15	21.8035		67817	3A	3A_IWB67817	739166671	184.47	180.325
9089	6B	6B_IWB9089	679242788	84.71	88.3633		41441	4D	4D_IWB41441	3611211	4.69	21.3122		67819	3A	3A_IWB67819	739166741	184.47	180.325
80505	6B	6B_IWA7056	679243318	84.71	87.9095		49180	4D	4D_IWB49180	6024164	9.57	25.6186		72092	3A	3A_IWB72092	739276806	184.47	180.325
9964	6B	6B_IWB9964	679622118	84.71	87.1423		79140	4D	4D_IWA5156	26481498	49.52	70.5898		10770	3A	3A_IWB10770	739392416	184.47	177.242
63554	6B	6B_IWB63554	694404622	105.08	100.131		27394	4D	4D_IWB27394	38354095	55.63	86.3239		70196	3A	3A_IWB70196	739397110	184.47	177.242
38887	6B	6B_IWB38887	696150409	107.2	104.968		23921	4D	4D_IWB23921	38354608	55.63	72.6707		28780	3A	3A_IWB28780	739395927	185.01	177.242
51603	6B	6B_IWB51603	696151765	107.2	104.585		65933	4D	4D_IWB65933	41724554	57.12	60.3914		32739	3A	3A_IWB32739	739566237	185.01	177.242
20944	6B	6B_IWB20944	696152425	107.2	63.7995		79324	4D	4D_IWA5381	62469566	59.56	80.6765		57034	3A	3A_IWB57034	739567182	185.01	177.242
48050	6B	6B_IWB48050	699202202	111.5	106.128		46581	4D	4D_IWB46581	64545887	60.96	59.9424		57035	3A	3A_IWB57035	739567216	185.01	177.242
10245	6B	6B_IWB10245	699203558	111.5	106.128		21081	4D	4D_IWB21081	65075329	60.96	48.9814		50704	3A	3A_IWB50704	739734944	186.18	177.242
75756	6B	6B_IWA600	701388864	111.5			39856	4D	4D_IWB39856	70986712	61.51			41384	3A	3A_IWB41384	742248468	186.66	104.132
63470	6B	6B_IWB63470	705160766	115.26			79944	4D	4D_IWA6277	94593361	63.73	105.07		59960	3A	3A_IWB59960	742614191	187.15	187.018
34751	6B	6B_IWB34751	705562996	116.38	113.103		30317	4D	4D_IWB30317	108902934	64.23	83.8442		81224	3A	3A_IWA8038	742765890	187.15	187.018
33739	6B	6B_IWB33739	707026837	117.55	111.331		17497	4D	4D_IWB17497	305486826	65.15	105.07		58893	3A	3A_IWB58893	742792708	187.15
74862	6B	6B_IWB74862	708027319	117.55	111.94		3295	4D	4D_IWB3295	302680725	65.67	105.07		20442	3A	3A_IWB20442	742876557	187.15
44253	6B	6B_IWB44253	708660622	118.22	112.76		51904	4D	4D_IWB51904	110955795	66.19	80.9019		78194	3A	3A_IWA3950	743192470	187.15
43133	6B	6B_IWB43133	708939957	118.22	113.275		61905	4D	4D_IWB61905	185796315	66.19			78195	3A	3A_IWA3951	743192503	187.15
72471	6B	6B_IWB72471	709532733	118.22	113.671		59507	4D	4D_IWB59507	263948709	66.67	83.8442		77357	3A	3A_IWA2870	743757924	187.15	177.242
78422	6B	6B_IWA4245	710102722	118.22	114.373		78267	4D	4D_IWA4044	308593162	67.64			76274	3A	3A_IWA1457	744380241	187.15	184.793
78423	6B	6B_IWA4246	710103661	118.22	116.236		58263	4D	4D_IWB58263	322855548	68.1	82.7921		48326	3A	3A_IWB48326	744390758	187.15	26.595
58199	6B	6B_IWB58199	712243698	118.82	116.236		57638	4D	4D_IWB57638	348798339	69.65	83.8442		77577	3A	3A_IWA3177	744434431	187.15	185.405
33838	6B	6B_IWB33838	712347083	118.82	116.236		55185	4D	4D_IWB55185	379240346	74.85	86.2892		60381	3A	3A_IWB60381	744664912	187.15	188.378
59473	6B	6B_IWB59473	717916560	120.87	118.991		65217	4D	4D_IWB65217	405767662	78.34			78548	3A	3A_IWA4407	746175159	187.15	188.378
73072	6B	6B_IWB73072	718376201	120.87	121.849		24711	4D	4D_IWB24711	423945955	78.85			66009	3A	3A_IWB66009	746352481	187.15	188.378
42128	6B	6B_IWB42128	718638983	120.87	122.25		24712	4D	4D_IWB24712	423945876	78.85			3770	3A	3A_IWB3770	746633485	187.15	188.378
42129	6B	6B_IWB42129	718639464	120.87	121.849		15515	4D	4D_IWB15515	434836282	79.85	90.9829		78193	3A	3A_IWA3949	743190600	187.75	187.018
3292	6B	6B_IWB3292	718920760	120.87	122.92		56006	4D	4D_IWB56006	438790220	82.55			73818	3A	3A_IWB73818	742364486	188.74
73821	6B	6B_IWB73821	718921356	120.87			18990	4D	4D_IWB18990	455746524	87.61	94.2199		69399	3A	3A_IWB69399	749333391	192.58	188.378
25142	6D	6D_IWB25142	4633874	0	0.374793		8475	4D	4D_IWB8475	456087458	87.61	94.2199		72446	3A	3A_IWB72446	749404693	192.58	188.378
28838	6D	6D_IWB28838	3119456	0.55	18.9963		7437	4D	4D_IWB7437	204707354	88.16			3584	3A	3A_IWB3584	749406389	192.58	188.378
75988	6D	6D_IWA984	3445317	0.55	22.925		19353	4D	4D_IWB19353	455339222	89.25	92.7517		7492	3A	3A_IWB7492	229360800	193.09
59282	6D	6D_IWB59282	4635464	0.55	22.925		33071	4D	4D_IWB33071	466130829	91.59	91.7517		63934	3A	3A_IWB63934	749278597	193.09	193.778
36391	6D	6D_IWB36391	6342756	1.66	18.1987		7164	4D	4D_IWB7164	479674790	95.88	105.07		63935	3A	3A_IWB63935	749278654	193.09	187.018
52065	6D	6D_IWB52065	6342855	1.66	23.8411		77010	4D	4D_IWA2395	497647531	116	118.127		72216	3A	3A_IWB72216	749278654	193.09	193.778
6072	6D	6D_IWB6072	6499143	1.66	16.9563		45037	4D	4D_IWB45037	497647531	116	118.127		64431	3B	3B_IWB64431	1617415	0	5.85834
18561	6D	6D_IWB18561	8342047	5.21	26.047		49126	4D	4D_IWB49126	499107694	120.26	114.289		72134	3B	3B_IWB72134	3240214	1.25	51.0723
45581	6D	6D_IWB45581	470042836	70.83	120.607		19222	4D	4D_IWB19222	499108143	122.14	114.289		72136	3B	3B_IWB72136	3241511	1.25	134.834
22803	6D	6D_IWB22803	468879198	72.07	162.909		72706	4D	4D_IWB72706	500716654	124.31	89.5538		23357	3B	3B_IWB23357	1253733	3.56	4.56078
34507	6D	6D_IWB34507	464345143	74.2	113.671		80153	4D	4D_IWA6591	509481054	140.85	153.688		42119	3B	3B_IWB42119	8336780	6.54	14.1045
40695	6D	6D_IWB40695	464949321	74.2	160.498		3187	4D	4D_IWB3187	108596791	146.03			14318	3B	3B_IWB14318	5952274	7.01	11.8367
46689	6D	6D_IWB46689	464949526	74.2	140.866		50540	5A	5A_IWB50540	10488	0	8.12291		77528	3B	3B_IWA3103	6680196	7.01	13.792
65984	6D	6D_IWB65984	465050345	74.2	160.498		70789	5A	5A_IWB70789	13137	0	8.12291		43766	3B	3B_IWB43766	6681124	7.01	9.7239
29056	6D	6D_IWB29056	461316610	75.42	150.557		71839	5A	5A_IWB71839	19589	0			4343	3B	3B_IWB4343	6754488	7.01	14.1045
76649	6D	6D_IWA1925	461357908	75.42			7984	5A	5A_IWB7984	21006	0			80598	3B	3B_IWA7174	7064123	7.01	21.3331
26484	6D	6D_IWB26484	461396510	75.42	134.788		28167	5A	5A_IWB28167	21102	0			62613	3B	3B_IWB62613	7130287	7.01	4.56078
73309	6D	6D_IWB73309	461686226	75.42	108.86		4290	5A	5A_IWB4290	644225	0	8.12291		80635	3B	3B_IWA7230	7187583	7.01	21.3331
13875	6D	6D_IWB13875	461687142	75.42			71134	5A	5A_IWB71134	665866	0	13.5235		78860	3B	3B_IWA4800	7188609	7.01	20.1354
35210	6D	6D_IWB35210	460734153	76.05			25755	5A	5A_IWB25755	671298	0	6.0797		3026	3B	3B_IWB3026	7604686	7.01	20.1354
8038	6D	6D_IWB8038	456456585	77.37			71841	5A	5A_IWB71841	1190940	0			12639	3B	3B_IWB12639	8811576	7.01	14.1045
81095	6D	6D_IWA7858	457529974	77.37			65889	5A	5A_IWB65889	1224625	0	8.65818		46019	3B	3B_IWB46019	8811888	7.01	14.1045
77424	6D	6D_IWA2965	458365319	77.37	121.753		78576	5A	5A_IWA4445	1225706	0	8.65818		6054	3B	3B_IWB6054	9092703	7.01	14.1045
27423	6D	6D_IWB27423	458506976	77.37	133.608		291	5A	5A_IWB291	1585142	0	6.0797		4653	3B	3B_IWB4653	9780220	7.01	25.4186
12800	6D	6D_IWB12800	458758863	77.37	133.608		33471	5A	5A_IWB33471	1613103	0	46.6923		29059	3B	3B_IWB29059	13898656	7.01	20.1354
29043	6D	6D_IWB29043	453013276	82.8	117.583		24515	5A	5A_IWB24515	2286635	0	8.79		57993	3B	3B_IWB57993	11087235	11.05	11.4641
77312	6D	6D_IWA2808	157321507	164.82	82.1426		34400	5A	5A_IWB34400	2288185	0			50547	3B	3B_IWB50547	8808107	13.2	14.1045
44389	6D	6D_IWB44389	275666534	164.82	83.4415		5795	5A	5A_IWB5795	2414818	1.5			32683	3B	3B_IWB32683	10955409	16.25	26.9239
75450	6D	6D_IWA167	105538136	165.98	82.1836		12074	5A	5A_IWB12074	2646301	1.5	16.6233		73453	3B	3B_IWB73453	10956668	16.25	26.9239
24502	6D	6D_IWB24502	62499819	175.17	77.5302		23807	5A	5A_IWB23807	2648868	1.5			1836	3B	3B_IWB1836	3989873	18.71	11.8742
54444	6D	6D_IWB54444	58695054	177.72	58.1954		1784	5A	5A_IWB1784	5071909	1.5	16.6233		8289	3B	3B_IWB8289	6178640	18.71	11.8367
65463	6D	6D_IWB65463	54015103	182.4	72.8404		78482	5A	5A_IWA4325	9657712	19.87	26.5058		42186	3B	3B_IWB42186	6666372	18.71	11.8367
38728	7A	7A_IWB38728	1720407	0	35.3147		3451	5A	5A_IWB3451	12977337	23.12			28314	3B	3B_IWB28314	7189460	20.52
7636	7A	7A_IWB7636	1743063	0	35.3147		46840	5A	5A_IWB46840	41418174	43.72	41.743		56978	3B	3B_IWB56978	13966476	21.21	7.13458
25937	7A	7A_IWB25937	3849798	0	150.713		41303	5A	5A_IWB41303	41426386	44.84	41.8768		62455	3B	3B_IWB62455	8806882	21.93	14.1045
63645	7A	7A_IWB63645	3907802	0	33.2442		81308	5A	5A_IWA8154	41427519	44.84	42.0306		8773	3B	3B_IWB8773	17596080	22.56	31.9421
78662	7A	7A_IWA4558	2717893	0.72	33.4451		80730	5A	5A_IWA7357	18680090	47.15			8163	3B	3B_IWB8163	18026098	22.56	33.7273
5838	7A	7A_IWB5838	6495549	2.46	150.713		80729	5A	5A_IWA7356	62977717	47.15			80940	3B	3B_IWA7647	17770999	26.04	31.5345
79864	7A	7A_IWA6160	6846747	4.77	33.4451		65704	5A	5A_IWB65704	73834014	47.15	26.5058		72604	3B	3B_IWB72604	18822241	26.77	5.78583
7092	7A	7A_IWB7092	6883565	4.77	26.2016		27896	5A	5A_IWB27896	74749066	48.11			68098	3B	3B_IWB68098	19869756	26.77	34.1999
79290	7A	7A_IWA5336	7587728	6.14	42.0848		33923	5A	5A_IWB33923	65355544	49.3	15.5428		427	3B	3B_IWB427	21002980	27.68	34.6075
67908	7A	7A_IWB67908	10908257	8.52	144.377		74359	5A	5A_IWB74359	97229367	49.99			58617	3B	3B_IWB58617	22075377	27.68	35.7676
58414	7A	7A_IWB58414	12177366	8.52	41.6387		64497	5A	5A_IWB64497	253605939	50.58			11621	3B	3B_IWB11621	23600417	32.37
55483	7A	7A_IWB55483	13798025	11.12	47.0057		51084	5A	5A_IWB51084	104233283	51.1			71404	3B	3B_IWB71404	23782130	32.37	37.2879
28886	7A	7A_IWB28886	15039538	11.81	52.3591		81231	5A	5A_IWA8048	94088950	51.58	26.5058		34284	3B	3B_IWB34284	25962532	34.67	63.0718
6832	7A	7A_IWB6832	15689339	11.81	144.377		63162	5A	5A_IWB63162	107893052	52.08			63385	3B	3B_IWB63385	26490546	34.67	1.03015
73493	7A	7A_IWB73493	16298502	12.57	45.2451		70840	5A	5A_IWB70840	107255439	53.21	15.6087		39127	3B	3B_IWB39127	26528765	38.68	38.7931
61383	7A	7A_IWB61383	16301642	12.57	139.966		68415	5A	5A_IWB68415	353602560	59.91			7592	3B	3B_IWB7592	29776852	44.87
38593	7A	7A_IWB38593	17441837	13.87	50.7551		64856	5A	5A_IWB64856	353606205	59.91			32646	3B	3B_IWB32646	32458897	46.19
80470	7A	7A_IWA7013	18877138	14.54			70206	5A	5A_IWB70206	366634536	60.96			11529	3B	3B_IWB11529	40245575	48.1	52.9901
76500	7A	7A_IWA1735	18880704	14.54	50.9833		23789	5A	5A_IWB23789	383464466	62.93			37006	3B	3B_IWB37006	48888853	55.95
3927	7A	7A_IWB3927	21262948	15.09	127.122		59420	5A	5A_IWB59420	450164108	74.79	49.7321		77783	3B	3B_IWA3426	52731299	57.12	57.9708
26974	7A	7A_IWB26974	23328874	15.09	49.1069		10938	5A	5A_IWB10938	450463803	74.79	49.7321		23630	3B	3B_IWB23630	66954023	62.73	61.6389
61248	7A	7A_IWB61248	23328958	15.09	55.5568		5642	5A	5A_IWB5642	462164377	82.29	53.465		78891	3B	3B_IWA4838	67413031	62.73	61.6389
19538	7A	7A_IWB19538	24468115	15.75	55.6556		46665	5A	5A_IWB46665	469065742	84.44			79281	3B	3B_IWA5325	68878346	62.73	61.8939
4817	7A	7A_IWB4817	25111982	15.75	56.1698		37619	5A	5A_IWB37619	466985880	86.78			10863	3B	3B_IWB10863	53567376	63.54	57.9708
1483	7A	7A_IWB1483	26789790	17.42	127.122		13024	5A	5A_IWB13024	468872585	86.78	53.465		73082	3B	3B_IWB73082	53804337	64.51	59.7786
12369	7A	7A_IWB12369	29829532	21	59.9056		49612	5A	5A_IWB49612	469900076	86.78	53.465		12433	3B	3B_IWB12433	75959441	64.72
22879	7A	7A_IWB22879	29534861	21.67	59.9056		125	5A	5A_IWB125	467382822	87.33	53.465		21771	3B	3B_IWB21771	78597256	65.3	62.569
12610	7A	7A_IWB12610	30377834	21.67	59.6775		22565	5A	5A_IWB22565	461490607	87.82	53.465		75861	3B	3B_IWA747	55456851	65.88	61.6389
6018	7A	7A_IWB6018	30061945	22.91			126	5A	5A_IWB126	467381940	87.82	53.465		14564	3B	3B_IWB14564	55456851	65.88	61.6389
68606	7A	7A_IWB68606	30140478	23.57	122.686		33227	5A	5A_IWB33227	458969969	88.33	52.7999		49982	3B	3B_IWB49982	55736390	65.88	61.6389
11004	7A	7A_IWB11004	31875912	24.32	61.8842		9533	5A	5A_IWB9533	474482949	88.84	53.465		71478	3B	3B_IWB71478	71795778	65.89
65343	7A	7A_IWB65343	33365022	25.03	63.2123		78268	5A	5A_IWA4048	474542080	88.84	53.465		50286	3B	3B_IWB50286	103237761	65.89	62.569
40828	7A	7A_IWB40828	35599987	33.44	65.2829		74982	5A	5A_IWB74982	475296150	89.78	53.465		42891	3B	3B_IWB42891	106284555	65.89	62.569
40827	7A	7A_IWB40827	35600127	33.44	65.2829		42774	5A	5A_IWB42774	476602412	89.78	53.465		62742	3B	3B_IWB62742	106964490	65.89	62.569
8513	7A	7A_IWB8513	35602463	33.44	65.4055		17870	5A	5A_IWB17870	477585547	93.86	55.6001		42840	3B	3B_IWB42840	107967085	65.89	62.569
9427	7A	7A_IWB9427	37095133	37.2	68.1945		468	5A	5A_IWB468	478018620	95.02	55.6001		80277	3B	3B_IWA6761	113905090	65.89	62.569
[truncated: 3,645 more rows]
